# Supplementary material for: LncRNA expression profile and ceRNA analysis in tomato during flowering
Source: PubMed Central journal article supplement (PMC6336255; doi:10.1371/journal.pone.0210650), 2019-01-17

**A**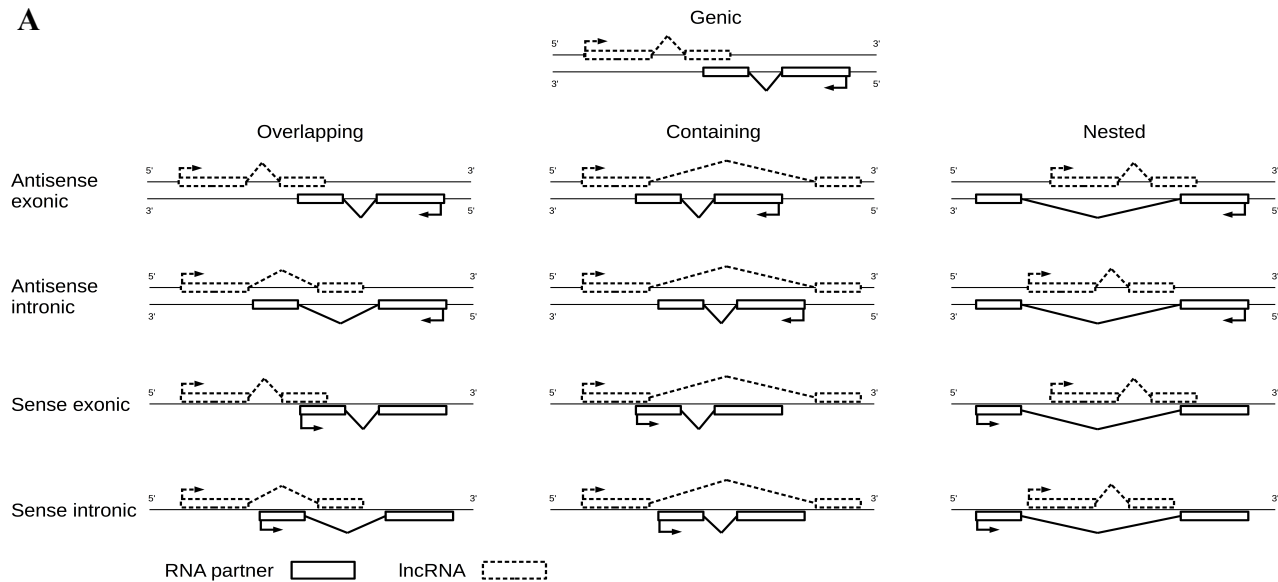**B**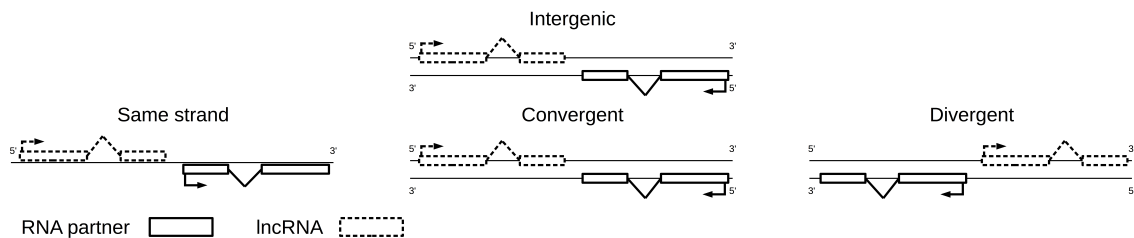

Supplement: pone.0210650.s001.pdf [file pone.0210650.s001.pdf]
