# Supplementary material for: LncRNA expression profile and ceRNA analysis in tomato during flowering
Source: PubMed Central journal article supplement (PMC6336255; doi:10.1371/journal.pone.0210650), 2019-01-17

A

## DEGs Number of The Most Enriched GO Term in L-vs-R

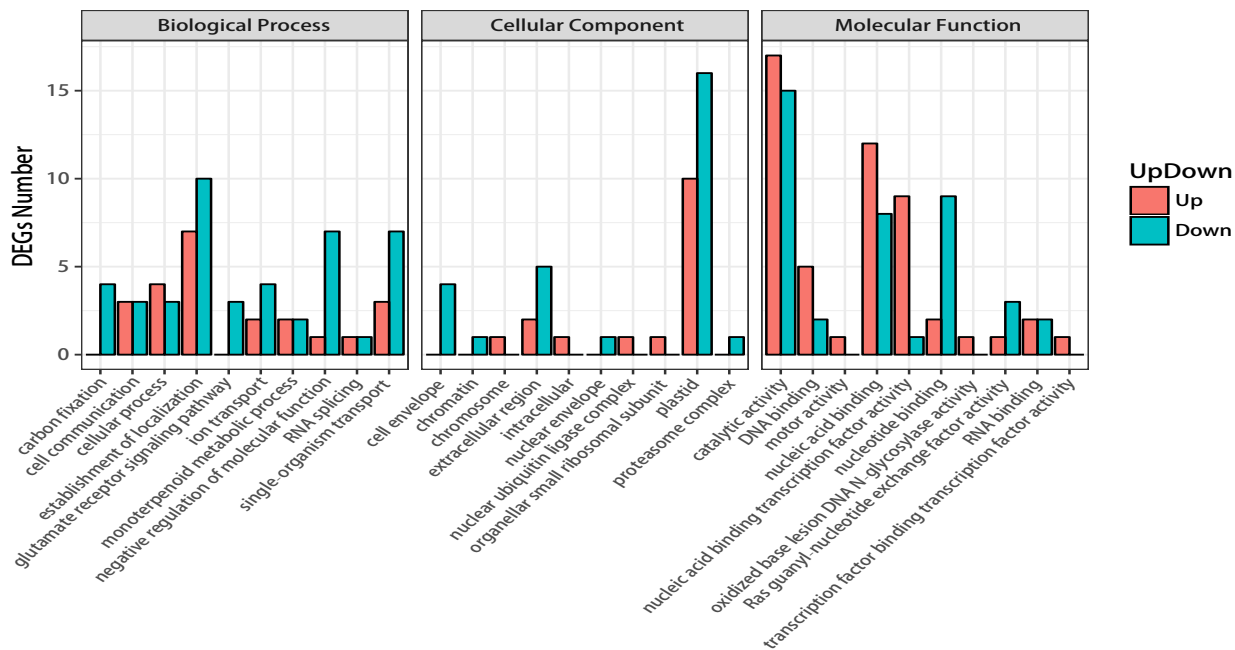

B

## Pathway Enrichment for L-vs-R

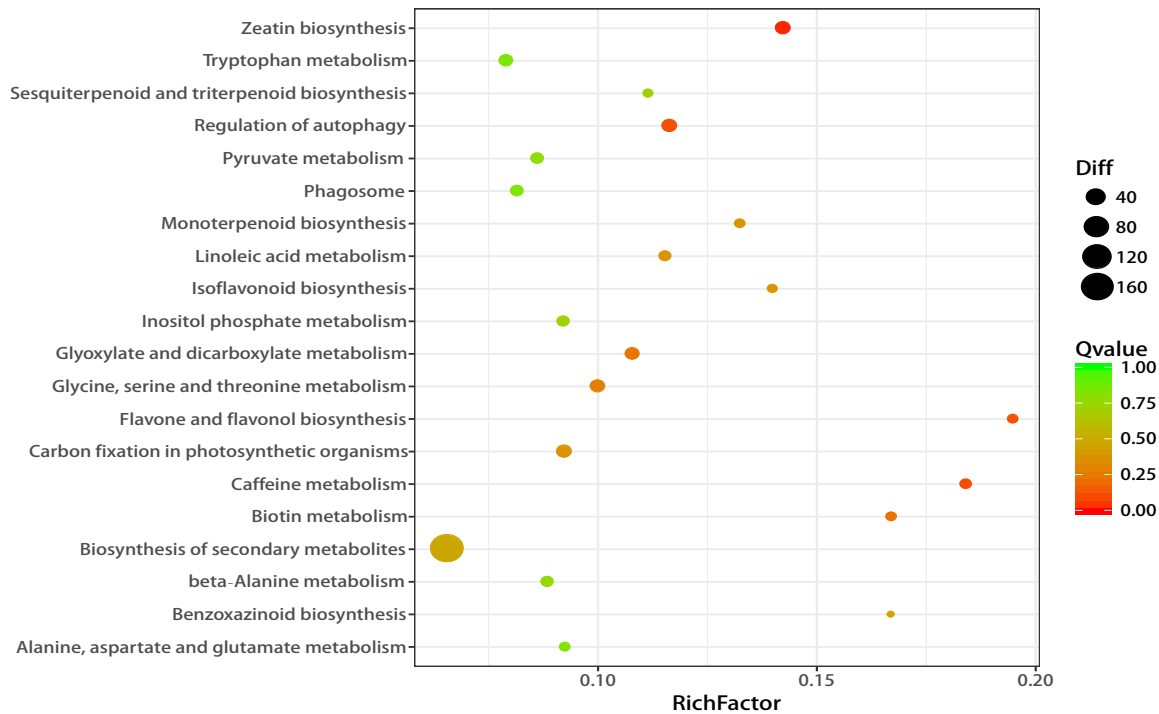

Supplement: pone.0210650.s002.pdf [file pone.0210650.s002.pdf]
