# Supplementary material for: LncRNA expression profile and ceRNA analysis in tomato during flowering
Source: PLoS One. 2019 Jan 17;14(1):e0210650. doi: 10.1371/journal.pone.0210650 (PMC6336255; doi:10.1371/journal.pone.0210650)
Supplement: S1 Table — (XLSX) [file pone.0210650.s003.xlsx]

## Sheet:  S1 Table
S1 Table: qRT-PCR primers of lncRNA
GeneID	Upstream primer	Downstream primer
Xloc_048112	5' TTCAAAATCATCACCTCCAGAAACCAGC 3'	5' TATCCAGCATCAGCACCGCCACTAC 3'
Xloc_069054	5' ATCATCATCTCTTCATCCTCAAACA 3'	5' TGGCGGTCGTGCTCCTATT 3'
Xloc_018782	5' GCCCATCATTGGAATAGCAAAAGAGC 3'	5' CAGCTAGGAGCAGGAGGGAAGAAGC 3'
Xloc_03583	5' TCACAAACCTACACCAACTCTAAACA 3'	5' GGACTTCCGTACTGAAAGAAATGAG 3'
Xloc_069355	5' TGATGAGTTGATCGGTGTTCTG 3'	5' TGTGCTGATCTGAAGAGGTCTCC 3'
Xloc_022749	5' CTGAAAGATTAGTTGGATGGAGGAGGTGA 3'	5' GTTGCCCTCTGTTCCGAAAATGACTC 3'
Xloc_064367	5' ATGTAGTCCTGGATTGAAGGAGAC 3'	5' GAACTTGTGACGATATGCCTCTC 3'
Xloc_58708	5' TCTATCTCTTGTTTGTTCAACCCCACTG 3'	5' ATGGAACAGATTGGTGAAAATGCCCTTA 3'
