# Supplementary material for: LncRNA expression profile and ceRNA analysis in tomato during flowering
Source: PLoS One. 2019 Jan 17;14(1):e0210650. doi: 10.1371/journal.pone.0210650 (PMC6336255; doi:10.1371/journal.pone.0210650)
Supplement: S2 Table — (XLSX) [file pone.0210650.s004.xlsx]

## Sheet: S2 Table
S2 Table: RNA-seq data for nine samples
Sample	Total reads	Clean Reads	Unique mapped reads
F1	81824486	0.9999	0.9037
F2	81760358	0.9999	0.8673
F3	80496996	0.9998	0.9237
L1	80618686	0.9998	0.7741
L2	81111640	0.9998	0.7384
L3	84395574	0.9999	0.7272
R1	80571720	0.9999	0.8953
R2	80841312	0.9998	0.8781
R3	80087212	0.9999	0.7404
