# Supplementary material for: LncRNA expression profile and ceRNA analysis in tomato during flowering
Source: PLoS One. 2019 Jan 17;14(1):e0210650. doi: 10.1371/journal.pone.0210650 (PMC6336255; doi:10.1371/journal.pone.0210650)
Supplement: S3 Table — (XLSX) [file pone.0210650.s005.xlsx]

## Sheet: S2 Table
S2 Table：Newly predicted LncRNA
GenBank accession number	TranscriptID	GeneID	Chromosome	Strand	Exon_number	Exon_Start	Exon_Sizes
MH894771	TCONS_00000089	XLOC_000043	NC_015438.2	+	2	439047441266	2087276
MH894772	TCONS_00000451	XLOC_000279	NC_015438.2	+	2	65459856547169	2422469
MH894773	TCONS_00000508	XLOC_000331	NC_015438.2	+	2	1377015113774360	104511
MH894774	TCONS_00000574	XLOC_000371	NC_015438.2	+	2	2432065024322700	8051309
MH894775	TCONS_00001646	XLOC_001079	NC_015438.2	+	2	8578380885784770	885196
MH894776	TCONS_00002598	XLOC_001557	NC_015438.2	+	3	9.321e+23	1341372940
MH894777	TCONS_00002611	XLOC_001568	NC_015438.2	+	2	9338727993387780	155149
MH894778	TCONS_00003140	XLOC_001858	NC_015438.2	+	3	9.75316e+23	45116291583
MH894779	TCONS_00003795	XLOC_002407	NC_015438.2	-	3	5.3634e+23	687167367
MH894780	TCONS_00003838	XLOC_002450	NC_015438.2	-	2	6050920660518820	984328
MH894781	TCONS_00003839	XLOC_002450	NC_015438.2	-	2	6050945760518820	1338328
MH894782	TCONS_00003840	XLOC_002450	NC_015438.2	-	2	6050992660511060	2648475
MH894783	TCONS_00004494	XLOC_002908	NC_015438.2	-	2	8311399383115380	909361
MH894784	TCONS_00005606	XLOC_003572	NC_015438.2	-	2	9393144693948700	1077100
MH894785	TCONS_00005768	XLOC_003696	NC_015438.2	-	2	9584445395844670	155149
MH894786	TCONS_00007728	XLOC_000537	NC_015438.2	+	1	63503430	1212
MH894787	TCONS_00008570	XLOC_002458	NC_015438.2	-	2	6092230960923110	4733201
MH894788	TCONS_00008611	XLOC_002583	NC_015438.2	-	2	7281774272821360	2925618
MH894789	TCONS_00008869	XLOC_003153	NC_015438.2	-	2	8745080987451060	149149
MH894790	TCONS_00009985	XLOC_000248	NC_015438.2	+	3	5.18348e+20	51239196
MH894791	TCONS_00010035	XLOC_000371	NC_015438.2	+	2	2432065124322700	10291441
MH894792	TCONS_00010126	XLOC_000532	NC_015438.2	+	3	6.30429e+23	233107662
MH894793	TCONS_00010400	XLOC_001079	NC_015438.2	+	2	8578303985783940	270585
MH894794	TCONS_00010915	XLOC_002058	NC_015438.2	-	2	24487162449357	1791960
MH894795	TCONS_00011068	XLOC_002494	NC_015438.2	-	2	6554032265544180	915208
MH894796	TCONS_00011125	XLOC_002665	NC_015438.2	-	1	76910706	1788
MH894797	TCONS_00011405	XLOC_003285	NC_015438.2	-	2	8965913689659460	131129
MH894798	TCONS_00011527	XLOC_003524	NC_015438.2	-	2	9328077193282790	621106
MH894799	TCONS_00011580	XLOC_003677	NC_015438.2	-	2	9557365095574850	5852703
MH894800	TCONS_00012596	XLOC_000232	NC_015438.2	+	2	44024214402695	200164
MH894801	TCONS_00012688	XLOC_000453	NC_015438.2	+	2	4452771844535060	56567
MH894802	TCONS_00013085	XLOC_001329	NC_015438.2	+	2	8937869089379310	520130
MH894803	TCONS_00013535	XLOC_002363	NC_015438.2	-	2	4247316342551690	206,27
MH894804	TCONS_00013570	XLOC_002495	NC_015438.2	-	2	6555939765560260	102290
MH894805	TCONS_00014128	XLOC_003868	NC_015438.2	-	2	9832751698328830	11741024
MH894806	TCONS_00015908	XLOC_002199	NC_015438.2	-	2	70153807015735	161569
MH894807	TCONS_00015918	XLOC_002231	NC_015438.2	-	2	1162715111634500	2241206
MH894808	TCONS_00015944	XLOC_002309	NC_015438.2	-	2	2490888824915640	516185
MH894809	TCONS_00015983	XLOC_002486	NC_015438.2	-	1	64530257	1229
MH894810	TCONS_00016233	XLOC_003142	NC_015438.2	-	2	8726752087267700	148149
MH894811	TCONS_00016406	XLOC_003677	NC_015438.2	-	2	9557451095575220	4702462
MH894812	TCONS_00018400	XLOC_002301	NC_015438.2	-	1	23459490	280
MH894813	TCONS_00018422	XLOC_002440	NC_015438.2	-	2	5913844859145600	54150
MH894814	TCONS_00018675	XLOC_003331	NC_015438.2	-	1	90303913	1020
MH894815	TCONS_00020047	XLOC_001557	NC_015438.2	+	3	9.321e+23	1661374006
MH894816	TCONS_00021928	XLOC_000335	NC_015438.2	+	3	1.40539e+23	112,53,213
MH894817	TCONS_00021963	XLOC_000431	NC_015438.2	+	3	4.25636e+23	3061117198
MH894818	TCONS_00021975	XLOC_000453	NC_015438.2	+	1	44534936	704
MH894819	TCONS_00022114	XLOC_000863	NC_015438.2	+	1	81147805	1215
MH894820	TCONS_00022595	XLOC_002361	NC_015438.2	-	3	4.12523e+23	597,191,43
MH894821	TCONS_00022596	XLOC_002363	NC_015438.2	-	3	4.24582e+23	10,198,47
MH894822	TCONS_00025541	XLOC_009351	NC_015439.2	+	2	74024777410292	856316
MH894823	TCONS_00025730	XLOC_009492	NC_015439.2	+	3	2.71997e+23	261118751
MH894824	TCONS_00025775	XLOC_009519	NC_015439.2	+	2	2925614229257810	684148
MH894825	TCONS_00026078	XLOC_009699	NC_015439.2	+	2	3694472036958270	1045702
MH894826	TCONS_00026140	XLOC_009738	NC_015439.2	+	1	37888988	1584
MH894827	TCONS_00026230	XLOC_009791	NC_015439.2	+	2	3873328538733500	142,76
MH894828	TCONS_00027188	XLOC_010326	NC_015439.2	+	2	4732038047365080	137100
MH894829	TCONS_00027974	XLOC_010730	NC_015439.2	+	2	5380318353808220	148125
MH894830	TCONS_00028192	XLOC_010866	NC_015439.2	-	2	78011847821925	27666
MH894831	TCONS_00028379	XLOC_011001	NC_015439.2	-	3	2.77707e+23	588163333
MH894832	TCONS_00028407	XLOC_011029	NC_015439.2	-	2	3048378030484120	149146
MH894833	TCONS_00028501	XLOC_011090	NC_015439.2	-	3	3.41197e+23	235,70,91
MH894834	TCONS_00029188	XLOC_011551	NC_015439.2	-	2	4254796242548550	554286
MH894835	TCONS_00029574	XLOC_011775	NC_015439.2	-	2	4626038746261400	149149
MH894836	TCONS_00029896	XLOC_011972	NC_015439.2	-	3	4.91294e+23	149,165,16
MH894837	TCONS_00029899	XLOC_011969	NC_015439.2	-	2	4913083349133240	281149
MH894838	TCONS_00029900	XLOC_011969	NC_015439.2	-	2	4913083349133190	227203
MH894839	TCONS_00031531	XLOC_009560	NC_015439.2	+	1	33538574	374
MH894840	TCONS_00031568	XLOC_009636	NC_015439.2	+	2	3553926735539500	1011058
MH894841	TCONS_00032177	XLOC_010671	NC_015439.2	+	2	5289861052902140	1595837
MH894842	TCONS_00032763	XLOC_012047	NC_015439.2	-	1	50255901	877
MH894843	TCONS_00032785	XLOC_012097	NC_015439.2	-	2	5085772850858440	143132
MH894844	TCONS_00033482	XLOC_009346	NC_015439.2	+	2	67320456738418	57104685
MH894845	TCONS_00033673	XLOC_009700	NC_015439.2	+	2	3694786636948360	300139
MH894846	TCONS_00034014	XLOC_010375	NC_015439.2	+	2	4834286348344210	144849
MH894847	TCONS_00034184	XLOC_010630	NC_015439.2	+	2	5209636452099810	188147
MH894848	TCONS_00034311	XLOC_010834	NC_015439.2	-	2	16540581661712	48242
MH894849	TCONS_00034332	XLOC_010914	NC_015439.2	-	1	20666012	216
MH894850	TCONS_00034629	XLOC_011667	NC_015439.2	-	2	4445049144454210	3263274
MH894851	TCONS_00034918	XLOC_012198	NC_015439.2	-	2	5258904052594040	149149
MH894852	TCONS_00035670	XLOC_009350	NC_015439.2	+	2	72257027236339	1722486
MH894853	TCONS_00035671	XLOC_009351	NC_015439.2	+	2	74025907410292	5783337
MH894854	TCONS_00036213	XLOC_010478	NC_015439.2	+	2	4991463349915430	6994325
MH894855	TCONS_00036545	XLOC_011059	NC_015439.2	-	2	3331348333313700	103633
MH894856	TCONS_00036892	XLOC_011969	NC_015439.2	-	2	4913083349133110	149281
MH894857	TCONS_00037951	XLOC_009968	NC_015439.2	+	3	4.18556e+23	120423146
MH894858	TCONS_00038129	XLOC_010407	NC_015439.2	+	2	4880481848804950	451471
MH894859	TCONS_00039636	XLOC_009468	NC_015439.2	+	2	2639160526399140	671,36
MH894860	TCONS_00043107	XLOC_010355	NC_015439.2	+	2	4787631047882260	114149
MH894861	TCONS_00043234	XLOC_010671	NC_015439.2	+	2	5289867152900050	3452934
MH894862	TCONS_00045665	XLOC_015835	NC_015440.2	+	2	509650516896	141512
MH894863	TCONS_00046185	XLOC_016142	NC_015440.2	+	2	82942648298413	285173
MH894864	TCONS_00046906	XLOC_016576	NC_015440.2	+	2	5701940357020850	178235
MH894865	TCONS_00047925	XLOC_017140	NC_015440.2	+	2	6827270968273090	3014789
MH894866	TCONS_00048417	XLOC_017444	NC_015440.2	-	2	23991012400888	1697198
MH894867	TCONS_00048733	XLOC_017644	NC_015440.2	-	2	79289957935420	2889155
MH894868	TCONS_00049157	XLOC_017977	NC_015440.2	-	3	5.35934e+23	920,77,102
MH894869	TCONS_00049268	XLOC_018053	NC_015440.2	-	2	5596827855989560	13011307
MH894870	TCONS_00049330	XLOC_018108	NC_015440.2	-	2	5908768859089230	9112127
MH894871	TCONS_00049377	XLOC_018140	NC_015440.2	-	3	5.9543e+23	784309917
MH894872	TCONS_00049446	XLOC_018172	NC_015440.2	-	2	6031899060321990	2802209
MH894873	TCONS_00049764	XLOC_018395	NC_015440.2	-	2	6430375164304380	149,91
MH894874	TCONS_00049873	XLOC_018455	NC_015440.2	-	4	6.52223e+31	149,60,67,3873
MH894875	TCONS_00051485	XLOC_015814	NC_015440.2	+	2	185321186245	145,59
MH894876	TCONS_00051546	XLOC_015938	NC_015440.2	+	3	2.37853e+20	148,78,149
MH894877	TCONS_00051750	XLOC_016330	NC_015440.2	+	3	3.52396e+23	524,93,570
MH894878	TCONS_00051751	XLOC_016330	NC_015440.2	+	3	3.52396e+23	234,93,498
MH894879	TCONS_00052301	XLOC_017488	NC_015440.2	-	2	34311573431412	123111
MH894880	TCONS_00052650	XLOC_018492	NC_015440.2	-	2	6573878065739250	3862892
MH894881	TCONS_00053473	XLOC_016178	NC_015440.2	+	2	1143376511436910	559149
MH894882	TCONS_00054275	XLOC_017701	NC_015440.2	-	2	1280128612803820	1983,81
MH894883	TCONS_00054344	XLOC_017896	NC_015440.2	-	2	5151431951522930	3794392
MH894884	TCONS_00054479	XLOC_018227	NC_015440.2	-	2	6142319661425310	1202146
MH894885	TCONS_00054738	XLOC_018782	NC_015440.2	-	2	7019943270199670	149237
MH894886	TCONS_00055687	XLOC_016424	NC_015440.2	+	2	5220921052212290	188381
MH894887	TCONS_00056447	XLOC_018255	NC_015440.2	-	2	6203845062040620	562,97
MH894888	TCONS_00057370	XLOC_016005	NC_015440.2	+	2	35826223586321	220512
MH894889	TCONS_00057550	XLOC_016408	NC_015440.2	+	2	5191958451920580	148,70
MH894890	TCONS_00058299	XLOC_018382	NC_015440.2	-	2	6409689664097080	149149
MH894891	TCONS_00058335	XLOC_018498	NC_015440.2	-	1	65870581	3574
MH894892	TCONS_00065367	XLOC_022695	NC_015441.2	+	2	35957183595887	70818
MH894893	TCONS_00065666	XLOC_022903	NC_015441.2	+	2	1625565916259300	686504
MH894894	TCONS_00065728	XLOC_022938	NC_015441.2	+	2	2433023724332640	18664734
MH894895	TCONS_00065747	XLOC_022961	NC_015441.2	+	2	3129763431299360	151280
MH894896	TCONS_00066282	XLOC_023292	NC_015441.2	+	1	58299142	829
MH894897	TCONS_00066354	XLOC_023332	NC_015441.2	+	2	5917524959179260	2661457
MH894898	TCONS_00067531	XLOC_024115	NC_015441.2	-	2	75243627566000	88115
MH894899	TCONS_00067605	XLOC_024174	NC_015441.2	-	3	1.88644e+23	214,34,899
MH894900	TCONS_00067652	XLOC_024204	NC_015441.2	-	2	2524135925243180	923509
MH894901	TCONS_00067726	XLOC_024253	NC_015441.2	-	3	3.99354e+23	2283136201
MH894902	TCONS_00068163	XLOC_024558	NC_015441.2	-	2	5945780559460320	840590
MH894903	TCONS_00070012	XLOC_023239	NC_015441.2	+	2	5543782455442520	303341
MH894904	TCONS_00070356	XLOC_024075	NC_015441.2	-	1	6108893	2929
MH894905	TCONS_00070383	XLOC_024125	NC_015441.2	-	2	93609199361221	210855
MH894906	TCONS_00070399	XLOC_024157	NC_015441.2	-	1	17075945	3153
MH894907	TCONS_00070532	XLOC_024451	NC_015441.2	-	2	5514828255149520	10021318
MH894908	TCONS_00071351	XLOC_022695	NC_015441.2	+	2	35957673596057	169648
MH894909	TCONS_00071366	XLOC_022750	NC_015441.2	+	2	46056424608776	228149
MH894910	TCONS_00071667	XLOC_023423	NC_015441.2	+	2	6084622060850320	965867
MH894911	TCONS_00071701	XLOC_023482	NC_015441.2	+	1	62173735	1449
MH894912	TCONS_00072188	XLOC_024652	NC_015441.2	-	2	6125632461256650	139149
MH894913	TCONS_00073000	XLOC_022749	NC_015441.2	+	2	45981524605870	45211
MH894914	TCONS_00073379	XLOC_023673	NC_015441.2	+	3	6.53318e+23	3047111983
MH894915	TCONS_00075099	XLOC_024174	NC_015441.2	-	2	1886446218872080	132740
MH894916	TCONS_00075187	XLOC_024329	NC_015441.2	-	1	50481838	217
MH894917	TCONS_00075194	XLOC_024362	NC_015441.2	-	2	5207770852118850	235,12
MH894918	TCONS_00078885	XLOC_022997	NC_015441.2	+	2	3840881038441310	764388
MH894919	TCONS_00081458	XLOC_028760	NC_015442.2	+	2	57996035799951	134149
MH894920	TCONS_00081807	XLOC_028960	NC_015442.2	+	2	2070649920708590	351990
MH894921	TCONS_00081873	XLOC_028993	NC_015442.2	+	2	2747418627480880	112274
MH894922	TCONS_00082115	XLOC_029190	NC_015442.2	+	3	5.64291e+23	140139799
MH894923	TCONS_00082160	XLOC_029232	NC_015442.2	+	2	5901817859023940	182408
MH894924	TCONS_00082237	XLOC_029279	NC_015442.2	+	1	60676120	1371
MH894925	TCONS_00082906	XLOC_029744	NC_015442.2	-	3	2.5607e+20	2448,56,100
MH894926	TCONS_00083210	XLOC_029943	NC_015442.2	-	2	64406836440852	148,55
MH894927	TCONS_00083400	XLOC_030095	NC_015442.2	-	2	2012797520140540	1872720
MH894928	TCONS_00085471	XLOC_028993	NC_015442.2	+	2	2747418627480870	112281
MH894929	TCONS_00085906	XLOC_029982	NC_015442.2	-	2	79490707956777	1305,99
MH894930	TCONS_00085942	XLOC_030090	NC_015442.2	-	2	1933033319335380	1753266
MH894931	TCONS_00086932	XLOC_028779	NC_015442.2	+	2	60497176053354	3517642
MH894932	TCONS_00087339	XLOC_029744	NC_015442.2	-	2	25604862564727	3899252
MH894933	TCONS_00088798	XLOC_029742	NC_015442.2	-	1	2542033	1208
MH894934	TCONS_00088943	XLOC_030158	NC_015442.2	-	2	2748081027481430	268,30
MH894935	TCONS_00089860	XLOC_028878	NC_015442.2	+	2	1056798010569660	5741045
MH894936	TCONS_00089923	XLOC_028993	NC_015442.2	+	2	2747422127480870	52255
MH894937	TCONS_00090053	XLOC_029222	NC_015442.2	+	2	5864711858649190	274209
MH894938	TCONS_00090406	XLOC_030331	NC_015442.2	-	3	5.69887e+23	799,82,588
MH894939	TCONS_00091453	XLOC_028993	NC_015442.2	+	2	2747423227480870	35255
MH894940	TCONS_00091532	XLOC_029232	NC_015442.2	+	3	5.90182e+23	154,95,113
MH894941	TCONS_00092612	XLOC_028993	NC_015442.2	+	1	27480848	428
MH894942	TCONS_00092645	XLOC_029071	NC_015442.2	+	2	3837979538426190	583,10
MH894943	TCONS_00093941	XLOC_028994	NC_015442.2	+	2	2749584927505740	141230
MH894944	TCONS_00095039	XLOC_028831	NC_015442.2	+	2	79490707956602	1130123
MH894945	TCONS_00095318	XLOC_030029	NC_015442.2	-	1	11257662	227
MH894946	TCONS_00095946	XLOC_034504	NC_015443.2	+	2	684934689547	272,21
MH894947	TCONS_00096341	XLOC_034778	NC_015443.2	+	2	2784350327850520	642900
MH894948	TCONS_00097799	XLOC_035706	NC_015443.2	+	4	4.88199e+31	128,65,106,493
MH894949	TCONS_00097805	XLOC_035709	NC_015443.2	+	2	4887173148892340	81133
MH894950	TCONS_00098187	XLOC_035935	NC_015443.2	-	2	33324563420835	149119
MH894951	TCONS_00098487	XLOC_036170	NC_015443.2	-	2	3347323933473740	4091223
MH894952	TCONS_00099087	XLOC_036609	NC_015443.2	-	2	4263520942635490	145146
MH894953	TCONS_00099566	XLOC_036937	NC_015443.2	-	2	4802011948023250	3052830
MH894954	TCONS_00100763	XLOC_034775	NC_015443.2	+	2	2713948227139720	194149
MH894955	TCONS_00101064	XLOC_035406	NC_015443.2	+	3	4.44891e+23	100,14,164
MH894956	TCONS_00101171	XLOC_035706	NC_015443.2	+	3	4.882e+23	225106375
MH894957	TCONS_00101227	XLOC_035811	NC_015443.2	-	2	876404877747	938,67
MH894958	TCONS_00102189	XLOC_034504	NC_015443.2	+	2	683691685206	234,21
MH894959	TCONS_00102272	XLOC_034686	NC_015443.2	+	2	1635346616361180	197409
MH894960	TCONS_00102603	XLOC_035406	NC_015443.2	+	2	4448911144489470	100149
MH894961	TCONS_00102684	XLOC_035583	NC_015443.2	+	2	4701924147019700	149149
MH894962	TCONS_00102749	XLOC_035706	NC_015443.2	+	3	4.882e+23	63744375
MH894963	TCONS_00102788	XLOC_035796	NC_015443.2	-	2	696461697937	1331306
MH894964	TCONS_00103090	XLOC_036588	NC_015443.2	-	2	4237749842379700	854662
MH894965	TCONS_00103133	XLOC_036693	NC_015443.2	-	2	4419084644207040	257,10
MH894966	TCONS_00104459	XLOC_035905	NC_015443.2	-	3	2.53223e+20	36,99,78
MH894967	TCONS_00104520	XLOC_036102	NC_015443.2	-	2	2797454728002100	264,13
MH894968	TCONS_00109222	XLOC_034562	NC_015443.2	+	2	18725921877212	986345
MH894969	TCONS_00109492	XLOC_035382	NC_015443.2	+	1	44190759	433
MH894970	TCONS_00109733	XLOC_036192	NC_015443.2	-	1	34509191	415
MH894971	TCONS_00109816	XLOC_036455	NC_015443.2	-	1	40165004	2566
MH894972	TCONS_00111785	XLOC_040344	NC_015444.2	+	2	58380045838687	5613230
MH894973	TCONS_00111786	XLOC_040344	NC_015444.2	+	2	58380045840780	3301137
MH894974	TCONS_00111842	XLOC_040380	NC_015444.2	+	2	82387408336356	118101
MH894975	TCONS_00112172	XLOC_040609	NC_015444.2	+	2	5398502753994780	70174
MH894976	TCONS_00112958	XLOC_041098	NC_015444.2	+	2	6554797865552060	336775
MH894977	TCONS_00113693	XLOC_041581	NC_015444.2	-	2	89984329001564	505,11
MH894978	TCONS_00113853	XLOC_041737	NC_015444.2	-	2	4081458040816180	370390
MH894979	TCONS_00114006	XLOC_041867	NC_015444.2	-	2	5587761955879410	484643
MH894980	TCONS_00114197	XLOC_041987	NC_015444.2	-	2	5974692959751620	4586122
MH894981	TCONS_00115886	XLOC_040431	NC_015444.2	+	1	15626174	239
MH894982	TCONS_00116465	XLOC_041768	NC_015444.2	-	2	4821843748229530	1746166
MH894983	TCONS_00116594	XLOC_042183	NC_015444.2	-	2	6354014563544040	735132
MH894984	TCONS_00117143	XLOC_040105	NC_015444.2	+	2	223448223613	117148
MH894985	TCONS_00117318	XLOC_040548	NC_015444.2	+	2	4777983447786510	668502
MH894986	TCONS_00117625	XLOC_041223	NC_015444.2	+	2	6723260267238660	223132
MH894987	TCONS_00117748	XLOC_041516	NC_015444.2	-	3	4.58596e+20	5661433453
MH894988	TCONS_00117757	XLOC_041521	NC_015444.2	-	1	4969118	883
MH894989	TCONS_00117874	XLOC_041837	NC_015444.2	-	2	5518522155185440	149149
MH894990	TCONS_00117920	XLOC_041962	NC_015444.2	-	1	59134190	262
MH894991	TCONS_00119005	XLOC_041034	NC_015444.2	+	2	6434233564346260	3573519
MH894992	TCONS_00119034	XLOC_041097	NC_015444.2	+	3	6.55268e+23	4123752083
MH894993	TCONS_00119197	XLOC_041593	NC_015444.2	-	2	98072259826488	11681710
MH894994	TCONS_00119230	XLOC_041703	NC_015444.2	-	2	3022147230221690	119149
MH894995	TCONS_00119267	XLOC_041825	NC_015444.2	-	2	5417463854177300	12111424
MH894996	TCONS_00120422	XLOC_040996	NC_015444.2	+	2	6379562063795900	132149
MH894997	TCONS_00120868	XLOC_042284	NC_015444.2	-	2	6533633265338100	149246
MH894998	TCONS_00121803	XLOC_040807	NC_015444.2	+	1	59991636	538
MH894999	TCONS_00121916	XLOC_041124	NC_015444.2	+	2	6584583365845930	41216
MH895000	TCONS_00122117	XLOC_041886	NC_015444.2	-	2	5674672656749690	2699136
MH895001	TCONS_00122139	XLOC_041962	NC_015444.2	-	2	5913419359134550	229,16
MH895002	TCONS_00123058	XLOC_041280	NC_015444.2	-	2	11343781	100134
MH895003	TCONS_00123133	XLOC_041581	NC_015444.2	-	1	8998436	523
MH895004	TCONS_00124157	XLOC_040389	NC_015444.2	+	2	89400178941107	129,95
MH895005	TCONS_00124170	XLOC_040424	NC_015444.2	+	3	1.53048e+23	59,44,181
MH895006	TCONS_00124550	XLOC_041634	NC_015444.2	-	1	15577724	235
MH895007	TCONS_00124648	XLOC_041918	NC_015444.2	-	1	57959394	525
MH895008	TCONS_00124696	XLOC_042134	NC_015444.2	-	1	62940172	3587
MH895009	TCONS_00126331	XLOC_045971	NC_015445.2	+	2	885214888032	150479
MH895010	TCONS_00126552	XLOC_046108	NC_015445.2	+	1	3329441	2203
MH895011	TCONS_00126652	XLOC_046197	NC_015445.2	+	2	1215482512164890	283518
MH895012	TCONS_00126948	XLOC_046436	NC_015445.2	+	2	5335260253366870	221198
MH895013	TCONS_00126958	XLOC_046447	NC_015445.2	+	2	5407803954078230	146104
MH895014	TCONS_00128258	XLOC_047267	NC_015445.2	-	2	34374923451199	13635144
MH895015	TCONS_00128343	XLOC_047330	NC_015445.2	-	2	77904667830133	1171705
MH895016	TCONS_00128394	XLOC_047365	NC_015445.2	-	2	1587935515882770	5011613
MH895017	TCONS_00129378	XLOC_048057	NC_015445.2	-	2	6355748163561010	1303114
MH895018	TCONS_00130559	XLOC_046033	NC_015445.2	+	2	18577211857981	150149
MH895019	TCONS_00131488	XLOC_048180	NC_015445.2	-	2	6547004865474190	984376
MH895020	TCONS_00132232	XLOC_046447	NC_015445.2	+	2	5407803954078180	100150
MH895021	TCONS_00132593	XLOC_047282	NC_015445.2	-	2	41549554155140	146146
MH895022	TCONS_00133743	XLOC_046316	NC_015445.2	+	2	4244664742449180	167470
MH895023	TCONS_00134139	XLOC_047376	NC_015445.2	-	1	17948186	251
MH895024	TCONS_00134141	XLOC_047384	NC_015445.2	-	2	2026671820269320	263,75
MH895025	TCONS_00135682	XLOC_047630	NC_015445.2	-	2	5419014554191970	537317
MH895026	TCONS_00136666	XLOC_046225	NC_015445.2	+	1	22239856	3213
MH895027	TCONS_00137150	XLOC_047789	NC_015445.2	-	2	5862869058631390	2457135
MH895028	TCONS_00137766	XLOC_046232	NC_015445.2	+	2	2401916624021040	890128
MH895029	TCONS_00138376	XLOC_048112	NC_015445.2	-	2	6442475764424970	149114
MH895030	TCONS_00139540	XLOC_047551	NC_015445.2	-	1	50728398	1239
MH895031	TCONS_00139564	XLOC_047630	NC_015445.2	-	1	54190120	2131
MH895032	TCONS_00141334	XLOC_051815	NC_015446.2	+	2	201860204887	1351217
MH895033	TCONS_00141895	XLOC_052212	NC_015446.2	+	2	1423803014247560	2876822
MH895034	TCONS_00141910	XLOC_052215	NC_015446.2	+	2	1489976014905320	1605465
MH895035	TCONS_00142012	XLOC_052279	NC_015446.2	+	2	3156464831569120	220666
MH895036	TCONS_00142225	XLOC_052457	NC_015446.2	+	3	6.09249e+23	138120132
MH895037	TCONS_00142760	XLOC_052825	NC_015446.2	+	2	7036171370366400	277,13
MH895038	TCONS_00143002	XLOC_052989	NC_015446.2	-	2	201917205467	87149
MH895039	TCONS_00143297	XLOC_053171	NC_015446.2	-	1	3487146	228
MH895040	TCONS_00143308	XLOC_053179	NC_015446.2	-	2	36289003629004	84147
MH895041	TCONS_00143505	XLOC_053342	NC_015446.2	-	2	92168289217130	163454
MH895042	TCONS_00143617	XLOC_053443	NC_015446.2	-	2	3069472930696970	362560
MH895043	TCONS_00143649	XLOC_053465	NC_015446.2	-	2	3370063033701710	374132
MH895044	TCONS_00143667	XLOC_053493	NC_015446.2	-	3	4.20467e+23	2002000415
MH895045	TCONS_00145772	XLOC_052251	NC_015446.2	+	2	2666510926665340	147394
MH895046	TCONS_00145848	XLOC_052457	NC_015446.2	+	2	6092815060928320	146138
MH895047	TCONS_00146262	XLOC_053460	NC_015446.2	-	2	3219934732209030	20171733
MH895048	TCONS_00146279	XLOC_053512	NC_015446.2	-	1	46066357	682
MH895049	TCONS_00146386	XLOC_053760	NC_015446.2	-	2	6554058065541970	1069293
MH895050	TCONS_00147104	XLOC_051901	NC_015446.2	+	2	14208671421050	127647
MH895051	TCONS_00147478	XLOC_052875	NC_015446.2	+	3	7.11404e+23	13172292600
MH895052	TCONS_00147689	XLOC_053342	NC_015446.2	-	2	92168399222195	388170
MH895053	TCONS_00147729	XLOC_053493	NC_015446.2	-	2	4204673542048830	1722857
MH895054	TCONS_00147952	XLOC_054039	NC_015446.2	-	1	70695680	391
MH895055	TCONS_00147953	XLOC_054040	NC_015446.2	-	1	70696598	335
MH895056	TCONS_00148918	XLOC_052835	NC_015446.2	+	3	7.04639e+23	29130106
MH895057	TCONS_00149010	XLOC_053048	NC_015446.2	-	3	1.22695e+20	6393746824
MH895058	TCONS_00149136	XLOC_053342	NC_015446.2	-	3	9.21684e+20	168101107
MH895059	TCONS_00149193	XLOC_053571	NC_015446.2	-	1	54049918	302
MH895060	TCONS_00150035	XLOC_052057	NC_015446.2	+	2	42511814257037	5496849
MH895061	TCONS_00150096	XLOC_052271	NC_015446.2	+	2	3050279030503200	3351410
MH895062	TCONS_00150106	XLOC_052287	NC_015446.2	+	3	3.37017e+23	411060525
MH895063	TCONS_00150147	XLOC_052370	NC_015446.2	+	3	5.30555e+23	388294408
MH895064	TCONS_00150251	XLOC_052663	NC_015446.2	+	3	6.72789e+23	119,41,783
MH895065	TCONS_00150486	XLOC_053349	NC_015446.2	-	2	1077751510788090	1068151
MH895066	TCONS_00150664	XLOC_053801	NC_015446.2	-	1	66562932	3171
MH895067	TCONS_00150719	XLOC_054018	NC_015446.2	-	2	7036171370362360	254,20
MH895068	TCONS_00150720	XLOC_054018	NC_015446.2	-	3	7.03617e+23	153,22,273
MH895069	TCONS_00151813	XLOC_053148	NC_015446.2	-	2	30530113059695	6587,99
MH895070	TCONS_00151876	XLOC_053438	NC_015446.2	-	2	2962679229626950	1351742
MH895071	TCONS_00151885	XLOC_053470	NC_015446.2	-	2	3529365335302210	10235
MH895072	TCONS_00152036	XLOC_054079	NC_015446.2	-	2	7149584871501740	120149
MH895073	TCONS_00152045	XLOC_054113	NC_015446.2	-	1	72240889	2745
MH895074	TCONS_00152676	XLOC_052401	NC_015446.2	+	2	5568304255807220	65199
MH895075	TCONS_00153851	XLOC_052057	NC_015446.2	+	3	4.25118e+20	4016906510
MH895076	TCONS_00153852	XLOC_052057	NC_015446.2	+	3	4.25118e+20	5054026510
MH895077	TCONS_00153853	XLOC_052057	NC_015446.2	+	3	4.25118e+20	40161133510
MH895078	TCONS_00154063	XLOC_052825	NC_015446.2	+	2	7036171270364070	264,66
MH895079	TCONS_00154096	XLOC_052966	NC_015446.2	+	5	7.23041e+39	18,17,17,95,149
MH895080	TCONS_00154214	XLOC_053376	NC_015446.2	-	1	14860816	302
MH895081	TCONS_00154228	XLOC_053455	NC_015446.2	-	2	3190376731916610	79151
MH895082	TCONS_00154319	XLOC_053735	NC_015446.2	-	2	6484194064843920	1698186
MH895083	TCONS_00154393	XLOC_054018	NC_015446.2	-	2	7036171270363980	190141
MH895084	TCONS_00155146	XLOC_052577	NC_015446.2	+	2	6536414165381120	29360
MH895085	TCONS_00155203	XLOC_052835	NC_015446.2	+	3	7.04641e+23	120,138,10
MH895086	TCONS_00155993	XLOC_057769	NC_015447.2	+	2	14268581427043	77133
MH895087	TCONS_00156005	XLOC_057777	NC_015447.2	+	2	16240271624207	147149
MH895088	TCONS_00156023	XLOC_057788	NC_015447.2	+	2	18149021817360	1608450
MH895089	TCONS_00156266	XLOC_057998	NC_015447.2	+	2	1310588013107370	484974
MH895090	TCONS_00156279	XLOC_058004	NC_015447.2	+	3	1.37179e+23	2251313929
MH895091	TCONS_00156291	XLOC_058010	NC_015447.2	+	1	14980885	942
MH895092	TCONS_00156437	XLOC_058097	NC_015447.2	+	2	3319974933204260	923437
MH895093	TCONS_00156520	XLOC_058162	NC_015447.2	+	1	41766636	2432
MH895094	TCONS_00156634	XLOC_058240	NC_015447.2	+	2	5119369551203000	135446
MH895095	TCONS_00156649	XLOC_058248	NC_015447.2	+	1	51432071	951
MH895096	TCONS_00156658	XLOC_058261	NC_015447.2	+	2	5208207752082520	322628
MH895097	TCONS_00156811	XLOC_058364	NC_015447.2	+	2	5879986958800410	106122
MH895098	TCONS_00156836	XLOC_058390	NC_015447.2	+	3	5.95139e+23	344,116,91
MH895099	TCONS_00156947	XLOC_058470	NC_015447.2	+	2	6089576860902590	1043325
MH895100	TCONS_00157028	XLOC_058526	NC_015447.2	+	2	6176565161765870	74149
MH895101	TCONS_00157563	XLOC_058892	NC_015447.2	-	2	15031441506758	1293118
MH895102	TCONS_00157715	XLOC_058991	NC_015447.2	-	2	32108253212420	149100
MH895103	TCONS_00157843	XLOC_059097	NC_015447.2	-	2	1052086110526090	1931559
MH895104	TCONS_00157853	XLOC_059102	NC_015447.2	-	3	1.09436e+23	623150141
MH895105	TCONS_00157876	XLOC_059130	NC_015447.2	-	2	1841676518426370	442270
MH895106	TCONS_00157906	XLOC_059154	NC_015447.2	-	2	2163308321637320	800295
MH895107	TCONS_00158026	XLOC_059253	NC_015447.2	-	2	4194457241952880	528846
MH895108	TCONS_00158168	XLOC_059360	NC_015447.2	-	2	5334661253347990	6193447
MH895109	TCONS_00158243	XLOC_059434	NC_015447.2	-	2	5716287157163160	2233753
MH895110	TCONS_00158279	XLOC_059468	NC_015447.2	-	4	5.84076e+31	3726,2725,87,174
MH895111	TCONS_00158483	XLOC_059632	NC_015447.2	-	2	6128237061283360	149187
MH895112	TCONS_00158720	XLOC_059770	NC_015447.2	-	2	6342946063433940	44001782
MH895113	TCONS_00160200	XLOC_058074	NC_015447.2	+	2	2780746227810090	3481694
MH895114	TCONS_00160246	XLOC_058169	NC_015447.2	+	3	4.28297e+23	620141292
MH895115	TCONS_00160464	XLOC_058708	NC_015447.2	+	2	6439667964396910	82137
MH895116	TCONS_00160575	XLOC_058964	NC_015447.2	-	2	27754392778475	29281102
MH895117	TCONS_00160735	XLOC_059468	NC_015447.2	-	5	5.84076e+39	2424,1220,35,87,158
MH895118	TCONS_00160794	XLOC_059638	NC_015447.2	-	2	6137377061377060	2941350
MH895119	TCONS_00161717	XLOC_058312	NC_015447.2	+	2	5689727056898500	11601940
MH895120	TCONS_00161794	XLOC_058441	NC_015447.2	+	2	6043909060441770	2170309
MH895121	TCONS_00161836	XLOC_058536	NC_015447.2	+	1	61937743	230
MH895122	TCONS_00161865	XLOC_058634	NC_015447.2	+	2	6332465663324920	132141
MH895123	TCONS_00161934	XLOC_058800	NC_015447.2	-	2	276396280154	3424383
MH895124	TCONS_00161964	XLOC_058885	NC_015447.2	-	2	14411791441384	114111
MH895125	TCONS_00161982	XLOC_058941	NC_015447.2	-	2	22581582268619	1773,57
MH895126	TCONS_00162139	XLOC_059360	NC_015447.2	-	2	5334666753347990	5773483
MH895127	TCONS_00162174	XLOC_059491	NC_015447.2	-	1	59016504	791
MH895128	TCONS_00162207	XLOC_059590	NC_015447.2	-	2	6069805060702160	820232
MH895129	TCONS_00162208	XLOC_059590	NC_015447.2	-	2	6070176160702160	237248
MH895130	TCONS_00163206	XLOC_058362	NC_015447.2	+	1	58760029	644
MH895131	TCONS_00163423	XLOC_059046	NC_015447.2	-	2	54762875483982	1722929
MH895132	TCONS_00163532	XLOC_059468	NC_015447.2	-	3	5.84226e+23	5122,87,180
MH895133	TCONS_00163535	XLOC_059468	NC_015447.2	-	2	5842266558427670	25551344
MH895134	TCONS_00163555	XLOC_059590	NC_015447.2	-	2	6070176160702160	149248
MH895135	TCONS_00163613	XLOC_059793	NC_015447.2	-	2	6373864863739670	714,96
MH895136	TCONS_00164405	XLOC_057849	NC_015447.2	+	2	26308052632702	1684434
MH895137	TCONS_00164554	XLOC_058166	NC_015447.2	+	2	4242043742428970	66750
MH895138	TCONS_00164560	XLOC_058178	NC_015447.2	+	2	4388656543917290	309,11
MH895139	TCONS_00164655	XLOC_058364	NC_015447.2	+	2	5879986958800410	108122
MH895140	TCONS_00164726	XLOC_058661	NC_015447.2	+	1	63775631	1582
MH895141	TCONS_00164872	XLOC_059046	NC_015447.2	-	2	54771275483644	5441238
MH895142	TCONS_00164927	XLOC_059229	NC_015447.2	-	2	3881341838826500	452175
MH895143	TCONS_00165057	XLOC_059632	NC_015447.2	-	3	6.12814e+23	11148136
MH895144	TCONS_00166029	XLOC_057914	NC_015447.2	+	2	41485474156018	121851
MH895145	TCONS_00166141	XLOC_058227	NC_015447.2	+	1	49791806	1054
MH895146	TCONS_00166155	XLOC_058252	NC_015447.2	+	2	5152356451523950	137149
MH895147	TCONS_00166156	XLOC_058253	NC_015447.2	+	2	5152380751524210	149149
MH895148	TCONS_00166232	XLOC_058588	NC_015447.2	+	1	62636392	724
MH895149	TCONS_00166370	XLOC_059046	NC_015447.2	-	2	54764265483782	24821165
MH895150	TCONS_00167049	XLOC_057877	NC_015447.2	+	2	31429273143181	149149
MH895151	TCONS_00167109	XLOC_058010	NC_015447.2	+	2	1498115714982430	780,66
MH895152	TCONS_00167465	XLOC_059051	NC_015447.2	-	2	55962625597180	149,60
MH895153	TCONS_00167549	XLOC_059315	NC_015447.2	-	3	4.97957e+23	150156149
MH895154	TCONS_00167621	XLOC_059503	NC_015447.2	-	1	59434497	310
MH895155	TCONS_00168553	XLOC_057934	NC_015447.2	+	2	54779095484647	884215
MH895156	TCONS_00168585	XLOC_058052	NC_015447.2	+	2	2477996924793150	1649807
MH895157	TCONS_00168725	XLOC_058457	NC_015447.2	+	3	6.06998e+23	26079351286
MH895158	TCONS_00168753	XLOC_058577	NC_015447.2	+	1	62478412	485
MH895159	TCONS_00168799	XLOC_058786	NC_015447.2	-	2	9373093906	149149
MH895160	TCONS_00168979	XLOC_059468	NC_015447.2	-	5	5.84076e+39	2425,1220,2725,87,196
MH895161	TCONS_00168993	XLOC_059552	NC_015447.2	-	3	6.02375e+23	8561531200
MH895162	TCONS_00170009	XLOC_059046	NC_015447.2	-	2	54766345483782	11751129
MH895163	TCONS_00170045	XLOC_059364	NC_015447.2	-	1	53525913	271
MH895164	TCONS_00170647	XLOC_063832	NC_015448.2	+	2	996773999489	84882
MH895165	TCONS_00170803	XLOC_063941	NC_015448.2	+	2	26506272654477	3732988
MH895166	TCONS_00170918	XLOC_064014	NC_015448.2	+	1	3811722	427
MH895167	TCONS_00171209	XLOC_064210	NC_015448.2	+	2	86930318695378	977234
MH895168	TCONS_00171275	XLOC_064252	NC_015448.2	+	2	1195778011957990	1243247
MH895169	TCONS_00171320	XLOC_064290	NC_015448.2	+	2	1705403717090880	790,11
MH895170	TCONS_00171407	XLOC_064364	NC_015448.2	+	1	30599972	608
MH895171	TCONS_00171414	XLOC_064372	NC_015448.2	+	2	3142570931427160	5027950
MH895172	TCONS_00171495	XLOC_064405	NC_015448.2	+	3	3.34566e+23	1521541294
MH895173	TCONS_00171532	XLOC_064431	NC_015448.2	+	2	3669302336693290	185506
MH895174	TCONS_00171573	XLOC_064462	NC_015448.2	+	2	4284338942844380	319327
MH895175	TCONS_00171597	XLOC_064487	NC_015448.2	+	3	4.82495e+23	225,70,279
MH895176	TCONS_00171647	XLOC_064523	NC_015448.2	+	2	5026926450271350	250,65
MH895177	TCONS_00171895	XLOC_064675	NC_015448.2	+	2	5365893953660930	19061385
MH895178	TCONS_00171976	XLOC_064728	NC_015448.2	+	2	5465961554661130	119,93
MH895179	TCONS_00171994	XLOC_064740	NC_015448.2	+	2	5488849654889270	703435
MH895180	TCONS_00172038	XLOC_064759	NC_015448.2	+	2	5520664655208500	2671605
MH895181	TCONS_00172246	XLOC_064870	NC_015448.2	-	2	780032780280	118126
MH895182	TCONS_00172721	XLOC_065186	NC_015448.2	-	2	73458907404184	707422
MH895183	TCONS_00172805	XLOC_065249	NC_015448.2	-	2	1026234110264350	1203279
MH895184	TCONS_00172831	XLOC_065272	NC_015448.2	-	2	1291401012916280	149149
MH895185	TCONS_00172834	XLOC_065275	NC_015448.2	-	2	1313579613136750	2911983
MH895186	TCONS_00173017	XLOC_065416	NC_015448.2	-	1	33038722	262
MH895187	TCONS_00173113	XLOC_065485	NC_015448.2	-	3	4.47766e+23	228,72,179
MH895188	TCONS_00173144	XLOC_065521	NC_015448.2	-	2	4900231249080930	247142
MH895189	TCONS_00173285	XLOC_065627	NC_015448.2	-	2	5245602852460280	3345187
MH895190	TCONS_00174883	XLOC_064730	NC_015448.2	+	3	5.47033e+23	4161313795
MH895191	TCONS_00174885	XLOC_064730	NC_015448.2	+	3	5.47032e+23	5511314191
MH895192	TCONS_00175249	XLOC_065611	NC_015448.2	-	2	5179771051798820	255455
MH895193	TCONS_00175803	XLOC_063885	NC_015448.2	+	2	17629691763579	93236
MH895194	TCONS_00175958	XLOC_064279	NC_015448.2	+	1	14383695	419
MH895195	TCONS_00176328	XLOC_065134	NC_015448.2	-	2	51783165178489	128212
MH895196	TCONS_00176329	XLOC_065134	NC_015448.2	-	2	51783405178513	89236
MH895197	TCONS_00176394	XLOC_065310	NC_015448.2	-	1	18683954	204
MH895198	TCONS_00176576	XLOC_065820	NC_015448.2	-	2	5539926655399570	148109
MH895199	TCONS_00176577	XLOC_065832	NC_015448.2	-	2	5548189455482950	9211370
MH895200	TCONS_00177243	XLOC_064299	NC_015448.2	+	2	1864486018652290	151176
MH895201	TCONS_00177253	XLOC_064325	NC_015448.2	+	2	2110545321112790	58112913
MH895202	TCONS_00177254	XLOC_064326	NC_015448.2	+	2	2124365221251110	160392
MH895203	TCONS_00177333	XLOC_064530	NC_015448.2	+	2	5041528350416000	644,52
MH895204	TCONS_00177388	XLOC_064661	NC_015448.2	+	3	5.33889e+23	257183918
MH895205	TCONS_00177392	XLOC_064675	NC_015448.2	+	3	5.36589e+23	10916941444
MH895206	TCONS_00177483	XLOC_064886	NC_015448.2	-	1	1017686	914
MH895207	TCONS_00177556	XLOC_065134	NC_015448.2	-	2	51783145178444	100149
MH895208	TCONS_00177611	XLOC_065312	NC_015448.2	-	2	1869384318738090	104138
MH895209	TCONS_00178458	XLOC_064367	NC_015448.2	+	2	3103849731039760	91124
MH895210	TCONS_00178506	XLOC_064487	NC_015448.2	+	2	4824953348250300	2151450
MH895211	TCONS_00178757	XLOC_065179	NC_015448.2	-	1	6779987	648
MH895212	TCONS_00178808	XLOC_065309	NC_015448.2	-	2	1859827318737770	122,93
MH895213	TCONS_00178829	XLOC_065366	NC_015448.2	-	2	3065877430659790	940175
MH895214	TCONS_00178869	XLOC_065485	NC_015448.2	-	2	4477999344787840	345190
MH895215	TCONS_00178899	XLOC_065605	NC_015448.2	-	2	5171666851718900	149418
MH895216	TCONS_00178915	XLOC_065690	NC_015448.2	-	3	5.34641e+23	773414171651
MH895217	TCONS_00178924	XLOC_065722	NC_015448.2	-	2	5407301854076570	1837516
MH895218	TCONS_00179634	XLOC_064113	NC_015448.2	+	3	5.44416e+20	149120149
MH895219	TCONS_00179995	XLOC_065293	NC_015448.2	-	2	1611403316116040	526568
MH895220	TCONS_00180871	XLOC_064872	NC_015448.2	-	2	789188789285	69149
MH895221	TCONS_00180940	XLOC_065186	NC_015448.2	-	2	73458297403834	418711
MH895222	TCONS_00180941	XLOC_065186	NC_015448.2	-	2	73728867403730	177815
MH895223	TCONS_00181764	XLOC_064113	NC_015448.2	+	3	5.44416e+20	149222149
MH895224	TCONS_00181822	XLOC_064328	NC_015448.2	+	3	2.14285e+23	190133375
MH895225	TCONS_00181837	XLOC_064364	NC_015448.2	+	1	30598815	419
MH895226	TCONS_00183655	XLOC_068899	NC_015449.2	+	2	21989012199113	119130
MH895227	TCONS_00183695	XLOC_068928	NC_015449.2	+	1	2608013	387
MH895228	TCONS_00183823	XLOC_069009	NC_015449.2	+	2	38710643871332	157294
MH895229	TCONS_00183918	XLOC_069071	NC_015449.2	+	2	50634135063711	223195
MH895230	TCONS_00183919	XLOC_069071	NC_015449.2	+	2	50634135063636	148270
MH895231	TCONS_00184083	XLOC_069174	NC_015449.2	+	2	1115953411159900	149,94
MH895232	TCONS_00184528	XLOC_069469	NC_015449.2	+	2	4992845549935390	516249
MH895233	TCONS_00184866	XLOC_069722	NC_015449.2	+	2	6514552265149320	3708688
MH895234	TCONS_00185247	XLOC_070005	NC_015449.2	-	2	14134621413665	149149
MH895235	TCONS_00185262	XLOC_070014	NC_015449.2	-	2	15653381567357	8991412
MH895236	TCONS_00185403	XLOC_070123	NC_015449.2	-	2	33654483365663	149,52
MH895237	TCONS_00185797	XLOC_070401	NC_015449.2	-	2	3534583135348000	879507
MH895238	TCONS_00185810	XLOC_070407	NC_015449.2	-	1	36511254	236
MH895239	TCONS_00185867	XLOC_070448	NC_015449.2	-	1	37583503	3239
MH895240	TCONS_00186088	XLOC_070604	NC_015449.2	-	2	5357541853583540	801144
MH895241	TCONS_00187693	XLOC_068944	NC_015449.2	+	3	2.92302e+20	164,30,236
MH895242	TCONS_00187844	XLOC_069211	NC_015449.2	+	2	2196713321967230	471308
MH895243	TCONS_00187866	XLOC_069241	NC_015449.2	+	2	2976896329772690	4092862
MH895244	TCONS_00187916	XLOC_069350	NC_015449.2	+	2	3861089938614650	3265502
MH895245	TCONS_00187917	XLOC_069355	NC_015449.2	+	2	3871741338717670	106112
MH895246	TCONS_00188034	XLOC_069648	NC_015449.2	+	1	63804291	745
MH895247	TCONS_00189117	XLOC_069071	NC_015449.2	+	2	50634135063711	148195
MH895248	TCONS_00189327	XLOC_069583	NC_015449.2	+	2	6267773662678110	219370
MH895249	TCONS_00189377	XLOC_069719	NC_015449.2	+	2	6509854465098740	149149
MH895250	TCONS_00189548	XLOC_070117	NC_015449.2	-	3	3.26911e+20	11053459356
MH895251	TCONS_00189597	XLOC_070264	NC_015449.2	-	2	63008946307805	11871113
MH895252	TCONS_00189641	XLOC_070347	NC_015449.2	-	2	2196035821969810	8482254
MH895253	TCONS_00189662	XLOC_070401	NC_015449.2	-	2	3534566835348000	988516
MH895254	TCONS_00189819	XLOC_070705	NC_015449.2	-	1	62988284	1522
MH895255	TCONS_00189872	XLOC_070803	NC_015449.2	-	2	6481460164814820	134157
MH895256	TCONS_00190474	XLOC_068862	NC_015449.2	+	2	16486371652219	3426926
MH895257	TCONS_00190637	XLOC_069359	NC_015449.2	+	3	3.87616e+23	1512331053
MH895258	TCONS_00190886	XLOC_070117	NC_015449.2	-	2	32691063270611	11054943
MH895259	TCONS_00190889	XLOC_070122	NC_015449.2	-	2	33642643364558	185102
MH895260	TCONS_00191721	XLOC_069054	NC_015449.2	+	2	46949374695144	148169
MH895261	TCONS_00191834	XLOC_069225	NC_015449.2	+	2	2560516825605410	131358
MH895262	TCONS_00191944	XLOC_069496	NC_015449.2	+	2	5279020352795170	143617
MH895263	TCONS_00191949	XLOC_069513	NC_015449.2	+	2	5605908756060720	4851991
MH895264	TCONS_00192023	XLOC_069726	NC_015449.2	+	2	6517555665178810	1701447
MH895265	TCONS_00192157	XLOC_070169	NC_015449.2	-	2	42022044202408	129133
MH895266	TCONS_00192285	XLOC_070555	NC_015449.2	-	2	4752601947526580	438270
MH895267	TCONS_00192318	XLOC_070610	NC_015449.2	-	2	5498052054980720	149149
MH895268	TCONS_00192370	XLOC_070710	NC_015449.2	-	2	6306142263061630	117,91
MH895269	TCONS_00193207	XLOC_069084	NC_015449.2	+	2	53730865382171	240145
MH895270	TCONS_00193492	XLOC_070097	NC_015449.2	-	2	29863932986962	266145
MH895271	TCONS_00194415	XLOC_069504	NC_015449.2	+	2	5440573454413450	27201
MH895272	TCONS_00194566	XLOC_070047	NC_015449.2	-	1	2119042	304
MH895273	TCONS_00194667	XLOC_070459	NC_015449.2	-	1	38018147	1053
MH895274	TCONS_00194695	XLOC_070555	NC_015449.2	-	2	4752602447526900	433101
MH895275	TCONS_00194702	XLOC_070578	NC_015449.2	-	2	5011228250114210	891150
MH895276	TCONS_00195565	XLOC_068927	NC_015449.2	+	2	25932652594485	320,19
MH895277	TCONS_00195931	XLOC_070073	NC_015449.2	-	1	2593265	460
MH895278	TCONS_00196021	XLOC_070393	NC_015449.2	-	1	33213926	367
MH895279	TCONS_00196910	XLOC_069648	NC_015449.2	+	1	63804623	634
MH895280	TCONS_00196993	XLOC_070043	NC_015449.2	-	2	20691042071735	2316,70
MH895281	TCONS_00197082	XLOC_070571	NC_015449.2	-	1	49601579	2475
MH895282	TCONS_00197536	XLOC_074317	NW_004194383.1	-	2	14012551405969	15742201
MH895283	TCONS_00197863	XLOC_074437	NW_004194385.1	+	2	105284107917	10981284
MH895284	TCONS_00197951	XLOC_074505	NW_004194387.1	-	2	3833752412	918509
MH895285	TCONS_00198473	XLOC_074731	NW_004194497.1	-	3	105320412193	648,65,60
MH895286	TCONS_00198474	XLOC_074731	NW_004194497.1	-	3	105320412193	664,65,60
MH895287	TCONS_00199160	XLOC_075115	NW_004195123.1	+	2	0,405	345150
MH895288	TCONS_00199317	XLOC_075206	NW_004195343.1	-	1	2625	894
MH895289	TCONS_00199360	XLOC_075235	NW_004195451.1	-	2	112441	1245916
MH895290	TCONS_00199361	XLOC_075235	NW_004195451.1	-	3	1111762441	1072,80,916
MH895291	TCONS_00199363	XLOC_075235	NW_004195451.1	-	2	212441	1232916
MH895292	TCONS_00200358	XLOC_075813	NW_004196988.1	-	3	0,591,978	1012601152
MH895293	TCONS_00200488	XLOC_075878	NW_004197163.1	-	1	0	2032
