# Supplementary material for: LncRNA expression profile and ceRNA analysis in tomato during flowering
Source: PLoS One. 2019 Jan 17;14(1):e0210650. doi: 10.1371/journal.pone.0210650 (PMC6336255; doi:10.1371/journal.pone.0210650)
Supplement: S4 Table — (XLSX) [file pone.0210650.s006.xlsx]

## Sheet: S3 Table
S3 Table: LncRNA of three tomato tissues
GeneID	chrID	chr	start	end
100037490	NC_015439.2	chr2	48522378	48523877
100037492	NC_015439.2	chr2	46717511	46722250
100037495	NC_015447.2	chr10	59992663	59995222
100037497	NC_015448.2	chr11	5329510	5332671
100037498	NC_015438.2	chr1	90259396	90261870
100037499	NC_015441.2	chr4	55725004	55728998
100037501	NC_015443.2	chr6	25637844	25640030
100037502	NC_015440.2	chr3	2625688	2627852
100037503	NC_015440.2	chr3	70264620	70266732
100037505	NC_015444.2	chr7	64471420	64472954
100037508	NC_015439.2	chr2	46887919	46888850
100037510	NC_015441.2	chr4	4446320	4450061
100037511	NC_015438.2	chr1	3075573	3082480
100037512	NC_015443.2	chr6	45430840	45437822
100037513	NC_015449.2	chr12	4949899	4951921
100037515	NC_015441.2	chr4	65476831	65477558
100037726	NC_015440.2	chr3	62993147	62997436
100037728	NC_015446.2	chr9	14933553	14935391
100037729	NC_015439.2	chr2	50205762	50206335
100037730	NC_015441.2	chr4	65980732	65983935
100037733	NC_015448.2	chr11	55908576	55918689
100037737	NC_015447.2	chr10	63512756	63518435
100125891	NC_015445.2	chr8	985067	986475
100125904	NC_015443.2	chr6	42404076	42406370
100125909	NC_015439.2	chr2	30572190	30574300
100125910	NC_015441.2	chr4	35308851	35348302
100134875	NC_015447.2	chr10	1896975	1901467
100134877	NC_015439.2	chr2	54751393	54758274
100134879	NC_015441.2	chr4	65414803	65419484
100134880	NC_015442.2	chr5	4654137	4657788
100134882	NC_015441.2	chr4	24314447	24329070
100134883	NC_015441.2	chr4	62849884	62850952
100134884	NC_015439.2	chr2	34277890	34286209
100134886	NC_015438.2	chr1	98135955	98137577
100134891	NC_015438.2	chr1	78464704	78480153
100134893	NC_015446.2	chr9	70062836	70066146
100134894	NC_015446.2	chr9	4868859	4870138
100134896	NC_015445.2	chr8	61108877	61113487
100134900	NC_015448.2	chr11	1510019	1515652
100134901	NC_015438.2	chr1	2631313	2637198
100134908	NC_015439.2	chr2	49878618	49881889
100134910	NC_015444.2	chr7	64940121	64953564
100134911	NC_015449.2	chr12	2502554	2504617
100134914	NC_015448.2	chr11	10015313	10019763
100134915	NC_015443.2	chr6	1182180	1186850
100136876	NC_015439.2	chr2	46645083	46652620
100136877	NC_015444.2	chr7	66374692	66380060
100136886	NC_015439.2	chr2	40307974	40309992
100147715	NC_015441.2	chr4	57824378	57840346
100147716	NC_015447.2	chr10	60815447	60818962
100147717	NC_015443.2	chr6	27139289	27140031
100147720	NC_015438.2	chr1	4382452	4384278
100147721	NC_015444.2	chr7	59739982	59744227
100147722	NC_015448.2	chr11	4848575	4855301
100147723	NC_015438.2	chr1	13023	15024
100147724	NC_015446.2	chr9	16980860	17004235
100147727	NC_015439.2	chr2	37862304	37865934
100191110	NC_015438.2	chr1	97848479	97852144
100191111	NC_015438.2	chr1	94426996	94427828
100191114	NC_015438.2	chr1	308917	312404
100191116	NC_015439.2	chr2	51625279	51631156
100191117	NC_015444.2	chr7	56340016	56358942
100191118	NC_015448.2	chr11	55165767	55172189
100191121	NC_015439.2	chr2	50467863	50470774
100191124	NC_015441.2	chr4	976029	982020
100191127	NC_015438.2	chr1	81355126	81361948
100191128	NC_015444.2	chr7	261497	264495
100191131	NC_015444.2	chr7	55363770	55371925
100191137	NC_015444.2	chr7	1494819	1496768
100271890	NC_015438.2	chr1	96723813	96725066
100301908	NC_015438.2	chr1	81873593	81875176
100301919	NC_015443.2	chr6	35177651	35180836
100301922	NC_015443.2	chr6	35169713	35176673
100301923	NC_015447.2	chr10	59643633	59647106
100301926	NC_015443.2	chr6	38187608	38189002
100301927	NC_015440.2	chr3	70102217	70104850
100301929	NC_015440.2	chr3	63841772	63849291
100301932	NC_015443.2	chr6	48366986	48371487
100301933	NC_015441.2	chr4	63344809	63346489
100301934	NC_015444.2	chr7	65485198	65487435
100301935	NC_015446.2	chr9	71041869	71051868
100301938	NC_015445.2	chr8	52632537	52636929
100301943	NC_015439.2	chr2	49520439	49523425
100301944	NC_015443.2	chr6	42433910	42435803
100301945	NC_015439.2	chr2	31048354	31059156
100301981	NC_015440.2	chr3	7742130	7753359
100316872	NC_015438.2	chr1	75351848	75356311
100316874	NC_015446.2	chr9	68686044	68690870
100316877	NC_015445.2	chr8	8734209	8736394
100316879	NC_015440.2	chr3	5075669	5083484
100316881	NC_015439.2	chr2	40526980	40537084
100316882	NC_015439.2	chr2	44758149	44775323
100316888	NC_015449.2	chr12	37101297	37103266
100316889	NC_015438.2	chr1	85221261	85227433
100316890	NW_004196219.1	-	106	2614
100316893	NC_015449.2	chr12	65429711	65430727
100316894	NC_015440.2	chr3	69911894	69917464
100316899	NC_015438.2	chr1	97018562	97026172
100316900	NC_015441.2	chr4	60859853	60862964
100316901	NC_015438.2	chr1	96288572	96292974
100316902	NC_015438.2	chr1	88238620	88241834
100462655	NC_015443.2	chr6	42988450	42995483
100462656	NC_015444.2	chr7	10347429	10394314
100505458	NC_015446.2	chr9	426163	428916
100527967	NC_015441.2	chr4	1373773	1377486
100527969	NC_015438.2	chr1	77668429	77671124
100527972	NC_015439.2	chr2	50018028	50021928
100527977	NC_015448.2	chr11	6495006	6511550
100529103	NC_015438.2	chr1	80803163	80805838
100529127	NC_015443.2	chr6	2615844	2621332
100620057	NC_015439.2	chr2	36073687	36077338
100736246	NC_015441.2	chr4	54627568	54629809
100736247	NC_015438.2	chr1	92303284	92305724
100736432	NC_015438.2	chr1	97523385	97524104
100736433	NC_015443.2	chr6	47192542	47195507
100736437	NC_015443.2	chr6	3329082	3332785
100736438	NC_015447.2	chr10	946965	949859
100736439	NC_015449.2	chr12	3377662	3380422
100736441	NC_015445.2	chr8	57237877	57240640
100736444	NC_015438.2	chr1	86839756	86841943
100736445	NC_015445.2	chr8	65361027	65365872
100736446	NC_015438.2	chr1	2238894	2244010
100736451	NC_015446.2	chr9	70382394	70385139
100736458	NC_015440.2	chr3	65802496	65804217
100736459	NC_015439.2	chr2	38217788	38218829
100736463	NC_015442.2	chr5	58904216	58910912
100736464	NC_015441.2	chr4	53086075	53092189
100736468	NC_015444.2	chr7	66721191	66724170
100736469	NC_015445.2	chr8	62532537	62536297
100736470	NC_015438.2	chr1	77084424	77090171
100736471	NC_015445.2	chr8	62130005	62139114
100736473	NC_015448.2	chr11	7173680	7178200
100736475	NC_015444.2	chr7	64225706	64231892
100736480	NC_015440.2	chr3	210196	213248
100736482	NC_015439.2	chr2	47121620	47123923
100736484	NC_015439.2	chr2	45104247	45107821
100736485	NC_015439.2	chr2	45109457	45113437
100736493	NC_015446.2	chr9	66057781	66059537
100736499	NC_015440.2	chr3	61708461	61711828
100736502	NC_015449.2	chr12	3579058	3588005
100736503	NC_015444.2	chr7	202539	203356
100736505	NC_015446.2	chr9	7154932	7157365
100736507	NC_015439.2	chr2	54436729	54440060
100736509	NC_015438.2	chr1	91734025	91739993
100736513	NC_015448.2	chr11	55862314	55866225
100736514	NC_015444.2	chr7	59437432	59448017
100736519	NC_015448.2	chr11	11820626	11822301
100736522	NC_015446.2	chr9	1504907	1505932
100736523	NC_015440.2	chr3	1316452	1317604
100736524	NC_015445.2	chr8	13134735	13141913
100736525	NC_015440.2	chr3	66701948	66703491
100736526	NC_015440.2	chr3	52078814	52083875
100736527	NC_015447.2	chr10	57108236	57109941
100736528	NC_015444.2	chr7	57317852	57319566
100736530	NC_015441.2	chr4	59543892	59550188
100736531	NC_015438.2	chr1	93290392	93298356
100736534	NC_015439.2	chr2	54077653	54080791
100736535	NC_015443.2	chr6	46865224	46868860
100736536	NC_015445.2	chr8	64531004	64534286
100736539	NC_015449.2	chr12	43038726	43046004
100736540	NC_015446.2	chr9	6007824	6012097
100736543	NC_015439.2	chr2	36687126	36688980
100736546	NC_015444.2	chr7	66975172	66979906
100736547	NC_015445.2	chr8	63484934	63486344
100736548	NC_015441.2	chr4	1389681	1397087
100736549	NC_015443.2	chr6	40647012	40648414
100750249	NC_015446.2	chr9	61552659	61556880
100750250	NC_015449.2	chr12	62572029	62573116
100750255	NC_015442.2	chr5	65422498	65428172
100750256	NC_015442.2	chr5	63481554	63483728
100820700	NC_015438.2	chr1	91007985	91010279
100820702	NC_015449.2	chr12	1067722	1072118
100820705	NC_015444.2	chr7	66870690	66872167
100820706	NC_015445.2	chr8	53237480	53246838
100820708	NC_015445.2	chr8	61672618	61679355
100874535	NC_015441.2	chr4	7229984	7232390
100874536	NC_015447.2	chr10	61345671	61348159
100874538	NC_015447.2	chr10	62930028	62933540
100874539	NC_015447.2	chr10	63805000	63808660
100874540	NC_015443.2	chr6	46591724	46596134
100874541	NC_015442.2	chr5	3565992	3566979
100874542	NC_015441.2	chr4	942578	943556
100874543	NC_015446.2	chr9	62400993	62401965
100874544	NC_015448.2	chr11	52741824	52748950
101055499	NC_015442.2	chr5	29281354	29283532
101055500	NC_015449.2	chr12	3266704	3268733
101055501	NC_015443.2	chr6	48251822	48253082
101055502	NC_015447.2	chr10	64620994	64622997
101055503	NC_015442.2	chr5	62532413	62535956
101055512	NC_015448.2	chr11	51656977	51659632
101055515	NC_015445.2	chr8	60730745	60733403
101055516	NC_015441.2	chr4	9603247	9603892
101055518	NC_015439.2	chr2	40119468	40127445
101055519	NC_015449.2	chr12	66881967	66886414
101055520	NC_015443.2	chr6	47223827	47226009
101055521	NC_015439.2	chr2	49629308	49636130
101055523	NC_015441.2	chr4	54066671	54067793
101055524	NC_015439.2	chr2	49771914	49774735
101055525	NC_015441.2	chr4	65116410	65121190
101055527	NC_015440.2	chr3	63540073	63545355
101055529	NC_015447.2	chr10	683607	690484
101055531	NC_015447.2	chr10	29054515	29063076
101055534	NC_015449.2	chr12	351056	351746
101055535	NC_015446.2	chr9	66096554	66109943
101055537	NC_015445.2	chr8	64242618	64247392
101055541	NC_015446.2	chr9	68933411	68934657
101055545	NC_015446.2	chr9	61808261	61812953
101055546	NC_015446.2	chr9	70314480	70317804
101055552	NC_015440.2	chr3	69297831	69299963
101055554	NC_015444.2	chr7	11423139	11424357
101055555	NC_015444.2	chr7	2730926	2732468
101055557	NC_015447.2	chr10	46278746	46280393
101055558	NC_015448.2	chr11	32035624	32044273
101055559	NC_015438.2	chr1	78640987	78646629
101055560	NC_015441.2	chr4	59816714	59821072
101055562	NC_015441.2	chr4	2017133	2019624
101055563	NC_015445.2	chr8	60245026	60245810
101055564	NC_015443.2	chr6	44642799	44644844
101055565	NC_015438.2	chr1	72784618	72786981
101055566	NC_015440.2	chr3	68858567	68859995
101055572	NC_015443.2	chr6	45177272	45180011
101055574	NC_015444.2	chr7	9969956	9981377
101055576	NC_015439.2	chr2	54201481	54214263
101055581	NC_015444.2	chr7	58597832	58602041
101055582	NC_015448.2	chr11	5480834	5484323
101055585	NC_015438.2	chr1	94788029	94789115
101055587	NC_015444.2	chr7	62062340	62066756
101055588	NC_015438.2	chr1	93688740	93690099
101055590	NC_015441.2	chr4	47476	48714
101055592	NC_015443.2	chr6	36013117	36013897
101055596	NC_015441.2	chr4	3894988	3900174
101055598	NC_015445.2	chr8	49996444	50000399
101055599	NC_015449.2	chr12	3791708	3796183
101055601	NC_015439.2	chr2	54462551	54463127
101055602	NC_015449.2	chr12	211259	214361
101055603	NC_015443.2	chr6	47244516	47247754
101055605	NC_015441.2	chr4	65828093	65830191
101055607	NC_015448.2	chr11	55581422	55583832
101243629	NC_015438.2	chr1	600732	603061
101243631	NC_015446.2	chr9	1419080	1422216
101243640	NC_015446.2	chr9	71842609	71843251
101243641	NC_015447.2	chr10	2239360	2246407
101243642	NC_015447.2	chr10	1383395	1387209
101243644	NC_015447.2	chr10	1248859	1253642
101243647	NC_015438.2	chr1	96796618	96802358
101243648	NC_015438.2	chr1	97869129	97870014
101243649	NC_015438.2	chr1	86814798	86817474
101243654	NC_015439.2	chr2	4485992	4526726
101243656	NC_015447.2	chr10	65098039	65101753
101243659	NC_015439.2	chr2	49675040	49675876
101243667	NC_015439.2	chr2	46586686	46587544
101243669	NC_015448.2	chr11	55441951	55450262
101243671	NC_015439.2	chr2	35499138	35500974
101243675	NC_015440.2	chr3	3455467	3456541
101243676	NC_015440.2	chr3	3117896	3119739
101243677	NC_015449.2	chr12	10627991	10629078
101243681	NC_015440.2	chr3	34361742	34387068
101243683	NC_015440.2	chr3	52516445	52523944
101243687	NC_015440.2	chr3	70457244	70463719
101243689	NC_015449.2	chr12	65399209	65401375
101243692	NC_015440.2	chr3	65450427	65452330
101243699	NC_015441.2	chr4	52628750	52630005
101243701	NC_015441.2	chr4	55694390	55696694
101243702	NC_015441.2	chr4	61945801	61949510
101243703	NC_015441.2	chr4	63131045	63131933
101243707	NC_015442.2	chr5	1038891	1043745
101243711	NC_015442.2	chr5	61050871	61052119
101243713	NC_015443.2	chr6	2299773	2308004
101243715	NC_015443.2	chr6	24665818	24667204
101243719	NC_015443.2	chr6	40437442	40442317
101243720	NC_015443.2	chr6	37758162	37760185
101243721	NC_015443.2	chr6	42242452	42245752
101243725	NC_015444.2	chr7	40979576	40982082
101243727	NC_015444.2	chr7	59628584	59634391
101243729	NC_015444.2	chr7	61518452	61521626
101243730	NC_015444.2	chr7	66008118	66010211
101243742	NC_015438.2	chr1	87605735	87608852
101243743	NC_015438.2	chr1	88543822	88547489
101243755	NC_015447.2	chr10	62725195	62731400
101243757	NC_015439.2	chr2	53291462	53295753
101243758	NC_015448.2	chr11	2570055	2575444
101243761	NC_015448.2	chr11	53417659	53419957
101243762	NC_015439.2	chr2	38977918	38982426
101243766	NC_015449.2	chr12	4262244	4263478
101243773	NC_015440.2	chr3	50352677	50355551
101243777	NC_015449.2	chr12	64981900	64985366
101243783	NC_015442.2	chr5	15688	18619
101243784	NC_015442.2	chr5	42051863	42053073
101243787	NC_015442.2	chr5	62433497	62437554
101243791	NC_015443.2	chr6	3858233	3880982
101243795	NC_015443.2	chr6	45420219	45422451
101243796	NC_015443.2	chr6	39120798	39121964
101243800	NC_015444.2	chr7	112241	113536
101243804	NC_015445.2	chr8	3184810	3192200
101243805	NC_015445.2	chr8	56406521	56408641
101243808	NC_015445.2	chr8	63762925	63766808
101243811	NC_015438.2	chr1	2391523	2395347
101243817	NC_015446.2	chr9	1452682	1453969
101243822	NC_015446.2	chr9	53050989	53054540
101243823	NC_015446.2	chr9	64095484	64100003
101243824	NC_015438.2	chr1	79763407	79767179
101243827	NC_015438.2	chr1	85567755	85569733
101243828	NC_015446.2	chr9	70871613	70873168
101243829	NC_015438.2	chr1	90379212	90380633
101243830	NC_015438.2	chr1	91216979	91218910
101243832	NC_015438.2	chr1	94083478	94085003
101243839	NC_015447.2	chr10	60965523	60968958
101243840	NC_015447.2	chr10	63632857	63637256
101243842	NC_015439.2	chr2	52320480	52328588
101243843	NC_015439.2	chr2	50545266	50549468
101243846	NC_015448.2	chr11	3533343	3537505
101243851	NC_015439.2	chr2	44185910	44187486
101243853	NC_015439.2	chr2	42360744	42362207
101243856	NC_015439.2	chr2	40363747	40367979
101243857	NC_015439.2	chr2	38266764	38270669
101243859	NC_015448.2	chr11	50807929	50815404
101243860	NC_015439.2	chr2	53721341	53722874
101243862	NC_015439.2	chr2	43392551	43401880
101243864	NC_015449.2	chr12	333857	336579
101243868	NC_015440.2	chr3	55471535	55474900
101243870	NC_015440.2	chr3	59444576	59445756
101243872	NC_015440.2	chr3	67530866	67537801
101243873	NC_015440.2	chr3	66316108	66319521
101243876	NC_015440.2	chr3	63486008	63489869
101243878	NC_015440.2	chr3	62684669	62685362
101243886	NC_015441.2	chr4	58468667	58470442
101243887	NC_015441.2	chr4	64089186	64090912
101243892	NC_015442.2	chr5	6442409	6446344
101243894	NC_015442.2	chr5	63346262	63351211
101243898	NC_015443.2	chr6	44391971	44394424
101243901	NC_015443.2	chr6	48350619	48356464
101243902	NC_015444.2	chr7	518583	524813
101243904	NC_015444.2	chr7	61314024	61315787
101243905	NC_015444.2	chr7	55581085	55583696
101243908	NC_015444.2	chr7	66772956	66773696
101243913	NC_015445.2	chr8	27533868	27545075
101243917	NC_015445.2	chr8	62850602	62859248
101243919	NC_015445.2	chr8	63262015	63264332
101243922	NC_015446.2	chr9	1435467	1438700
101243923	NC_015438.2	chr1	460007	461962
101243924	NC_015438.2	chr1	42524142	42524466
101243925	NC_015446.2	chr9	5596057	5599500
101243927	NC_015438.2	chr1	78557225	78591430
101243930	NC_015438.2	chr1	83267004	83270885
101243932	NC_015446.2	chr9	69415569	69416302
101243933	NC_015446.2	chr9	71839509	71842492
101243934	NC_015447.2	chr10	1221939	1230550
101243935	NC_015438.2	chr1	95661298	95663959
101243938	NC_015438.2	chr1	97871021	97880054
101243939	NC_015438.2	chr1	86821149	86824413
101243940	NC_015438.2	chr1	96293061	96296455
101243944	NC_015447.2	chr10	64715163	64728270
101243947	NC_015448.2	chr11	547383	548913
101243948	NC_015439.2	chr2	49667480	49669964
101243951	NC_015448.2	chr11	4606440	4614284
101243953	NC_015439.2	chr2	39385028	39385885
101243958	NC_015448.2	chr11	55452892	55457324
101243960	NC_015439.2	chr2	35488733	35489747
101243963	NC_015440.2	chr3	3430045	3432107
101243970	NC_015440.2	chr3	59121200	59121860
101243972	NC_015449.2	chr12	66419457	66423364
101243974	NC_015440.2	chr3	67047893	67055431
101243979	NC_015441.2	chr4	2554632	2556189
101243983	NC_015441.2	chr4	52609696	52618381
101243985	NC_015441.2	chr4	55752911	55755837
101243986	NC_015441.2	chr4	59576174	59577899
101243989	NC_015441.2	chr4	64664535	64666521
101243990	NC_015441.2	chr4	66341271	66342219
101243992	NC_015442.2	chr5	1044037	1047885
101243994	NC_015442.2	chr5	5589999	5596315
101243998	NC_015442.2	chr5	60985546	60990085
101244001	NC_015443.2	chr6	17088119	17093582
101244003	NC_015443.2	chr6	47472252	47474501
101244004	NC_015443.2	chr6	44679948	44681775
101244005	NC_015443.2	chr6	42058358	42059798
101244006	NC_015443.2	chr6	39553444	39556651
101244007	NC_015443.2	chr6	37742190	37752201
101244008	NC_015443.2	chr6	42237811	42239358
101244010	NC_015444.2	chr7	4263201	4264471
101244012	NC_015444.2	chr7	40981921	40987084
101244013	NC_015444.2	chr7	64300761	64302388
101244015	NC_015444.2	chr7	46934168	46936065
101244018	NC_015445.2	chr8	292570	304693
101244022	NC_015445.2	chr8	60837331	60843929
101244023	NC_015438.2	chr1	3833315	3837915
101244031	NC_015446.2	chr9	66989586	66994167
101244033	NC_015438.2	chr1	85937245	85937935
101244034	NC_015438.2	chr1	87609192	87629160
101244036	NC_015438.2	chr1	88555813	88563271
101244037	NC_015438.2	chr1	89449523	89456846
101244038	NC_015447.2	chr10	3196485	3199611
101244045	NC_015447.2	chr10	59230624	59232405
101244047	NC_015447.2	chr10	61939131	61941457
101244053	NC_015448.2	chr11	53420133	53425367
101244057	NC_015449.2	chr12	3285535	3293107
101244060	NC_015440.2	chr3	4976252	4978483
101244061	NC_015449.2	chr12	5884842	5886280
101244066	NC_015449.2	chr12	64199139	64204316
101244067	NC_015440.2	chr3	69567859	69571719
101244075	NC_015441.2	chr4	60519545	60524189
101244079	NC_015442.2	chr5	65715140	65718267
101244080	NC_015442.2	chr5	64258860	64261862
101244083	NC_015443.2	chr6	1304930	1310376
101244084	NC_015443.2	chr6	4379678	4382171
101244086	NC_015443.2	chr6	46299184	46300794
101244087	NC_015443.2	chr6	42872860	42878987
101244088	NC_015443.2	chr6	39113232	39114708
101244092	NC_015444.2	chr7	9831880	9833011
101244094	NC_015444.2	chr7	63320700	63324991
101244098	NC_015445.2	chr8	3238334	3241739
101244100	NC_015445.2	chr8	56413997	56415867
101244101	NC_015445.2	chr8	57935522	57938081
101244107	NC_015438.2	chr1	2385930	2389984
101244113	NC_015446.2	chr9	26652673	26667762
101244117	NC_015446.2	chr9	64100593	64109214
101244118	NC_015438.2	chr1	79768666	79777158
101244120	NC_015438.2	chr1	84590070	84592924
101244129	NC_015438.2	chr1	94863334	94866279
101244131	NC_015438.2	chr1	96928900	96929844
101244132	NC_015447.2	chr10	57175829	57185943
101244136	NC_015447.2	chr10	63642040	63644134
101244138	NC_015447.2	chr10	64434408	64436955
101244139	NC_015439.2	chr2	52313413	52314580
101244140	NC_015448.2	chr11	1515944	1520416
101244141	NC_015439.2	chr2	47880725	47882438
101244142	NC_015448.2	chr11	3562772	3564220
101244144	NC_015448.2	chr11	5640305	5643334
101244145	NC_015439.2	chr2	45211603	45213096
101244147	NC_015439.2	chr2	44180956	44183867
101244148	NC_015439.2	chr2	43113076	43119792
101244150	NC_015439.2	chr2	41682624	41687177
101244154	NC_015448.2	chr11	50796980	50808256
101244155	NC_015448.2	chr11	52507813	52512843
101244159	NC_015449.2	chr12	346137	347712
101244162	NC_015440.2	chr3	8095930	8098822
101244164	NC_015449.2	chr12	38733428	38735805
101244166	NC_015449.2	chr12	40334164	40337390
101244167	NC_015440.2	chr3	55485417	55486115
101244168	NC_015440.2	chr3	66318621	66320836
101244170	NC_015440.2	chr3	64392437	64395831
101244176	NC_015441.2	chr4	6034139	6040048
101244177	NC_015441.2	chr4	4642326	4650187
101244178	NC_015441.2	chr4	3399920	3405930
101244180	NC_015441.2	chr4	55145912	55147857
101244183	NC_015442.2	chr5	3085261	3088161
101244189	NC_015442.2	chr5	63318708	63323965
101244191	NC_015443.2	chr6	3023402	3024756
101244193	NC_015443.2	chr6	36132052	36141035
101244202	NC_015444.2	chr7	61317092	61319217
101244203	NC_015444.2	chr7	55538919	55539743
101244205	NC_015444.2	chr7	67483324	67491740
101244206	NC_015444.2	chr7	66763246	66771731
101244207	NC_015444.2	chr7	65190851	65194314
101244210	NC_015445.2	chr8	3192125	3196159
101244214	NC_015445.2	chr8	62850583	62851657
101244217	NC_015445.2	chr8	63256273	63257700
101244220	NC_015446.2	chr9	1429138	1431659
101244228	NC_015438.2	chr1	82016275	82018751
101244229	NC_015438.2	chr1	83275692	83277621
101244233	NC_015438.2	chr1	95673666	95675235
101244234	NC_015447.2	chr10	8468368	8470359
101244235	NC_015438.2	chr1	96453826	96458161
101244237	NC_015438.2	chr1	86828444	86830230
101244243	NC_015447.2	chr10	63245994	63249203
101244245	NC_015448.2	chr11	572053	573142
101244246	NC_015439.2	chr2	49665280	49666766
101244247	NC_015439.2	chr2	46832509	46836159
101244251	NC_015439.2	chr2	39380307	39383103
101244253	NC_015439.2	chr2	37407230	37408058
101244259	NC_015440.2	chr3	3036354	3040737
101244260	NC_015449.2	chr12	11158130	11160578
101244265	NC_015440.2	chr3	60989207	60990039
101244269	NC_015440.2	chr3	67061303	67065659
101244272	NC_015440.2	chr3	67679715	67682177
101244275	NC_015441.2	chr4	4155734	4157908
101244280	NC_015441.2	chr4	61969436	61973008
101244283	NC_015441.2	chr4	66347361	66348937
101244285	NC_015442.2	chr5	1055774	1059173
101244290	NC_015442.2	chr5	60882685	60884807
101244298	NC_015443.2	chr6	48943268	48949663
101244302	NC_015444.2	chr7	47335857	47336660
101244304	NC_015444.2	chr7	65989332	65994362
101244308	NC_015445.2	chr8	64709478	64716093
101244311	NC_015446.2	chr9	2408846	2419198
101244313	NC_015446.2	chr9	602167	604786
101244316	NC_015446.2	chr9	53574525	53576257
101244318	NC_015446.2	chr9	69006326	69011892
101244319	NC_015438.2	chr1	86400166	86401130
101244321	NC_015446.2	chr9	71323799	71330398
101244322	NC_015438.2	chr1	88524250	88530193
101244324	NC_015447.2	chr10	3186655	3187424
101244325	NC_015438.2	chr1	94270439	94278876
101244331	NC_015447.2	chr10	59239913	59243783
101244333	NC_015439.2	chr2	54023134	54026835
101244335	NC_015439.2	chr2	48691188	48692286
101244341	NC_015448.2	chr11	53426430	53429522
101244343	NC_015440.2	chr3	1576124	1584235
101244346	NC_015449.2	chr12	4263522	4264146
101244357	NC_015440.2	chr3	69568049	69574583
101244359	NC_015449.2	chr12	64946252	64951169
101244360	NC_015440.2	chr3	67430185	67433848
101244364	NC_015441.2	chr4	55296581	55301859
101244366	NC_015441.2	chr4	60806336	60809219
101244367	NC_015441.2	chr4	64099820	64102704
101244370	NC_015442.2	chr5	81293	84224
101244375	NC_015442.2	chr5	62428372	62433105
101244382	NC_015443.2	chr6	45401402	45406726
101244385	NC_015443.2	chr6	39108763	39111116
101244387	NC_015443.2	chr6	49660600	49669690
101244394	NC_015444.2	chr7	66116051	66120231
101244398	NC_015445.2	chr8	56422159	56424449
101244399	NC_015445.2	chr8	57941860	57944503
101244400	NC_015445.2	chr8	54248112	54249733
101244401	NC_015445.2	chr8	65539322	65545085
101244402	NC_015445.2	chr8	63696072	63702829
101244407	NC_015446.2	chr9	7176228	7178383
101244408	NC_015446.2	chr9	3644316	3666858
101244412	NC_015446.2	chr9	64112019	64115879
101244413	NC_015438.2	chr1	79788411	79790635
101244415	NC_015446.2	chr9	67900432	67905556
101244416	NC_015438.2	chr1	84594786	84597127
101244417	NC_015438.2	chr1	85583121	85585081
101244419	NC_015438.2	chr1	90394858	90401100
101244422	NC_015438.2	chr1	92217828	92226401
101244424	NC_015438.2	chr1	93037259	93040367
101244425	NC_015438.2	chr1	94882525	94887094
101244426	NC_015438.2	chr1	96669033	96670080
101244432	NC_015447.2	chr10	61026871	61032136
101244434	NC_015447.2	chr10	65212002	65218587
101244435	NC_015439.2	chr2	52302327	52305612
101244445	NC_015439.2	chr2	43122000	43126610
101244447	NC_015439.2	chr2	40326002	40330018
101244457	NC_015440.2	chr3	546776	550739
101244459	NC_015449.2	chr12	11179380	11181845
101244460	NC_015440.2	chr3	5016608	5022784
101244464	NC_015440.2	chr3	52498479	52500266
101244466	NC_015440.2	chr3	55510827	55515587
101244469	NC_015440.2	chr3	68833622	68839996
101244470	NC_015440.2	chr3	66298128	66304125
101244471	NC_015440.2	chr3	65765632	65767033
101244472	NC_015440.2	chr3	64390228	64391765
101244473	NC_015440.2	chr3	63472513	63473874
101244475	NC_015440.2	chr3	62657940	62660606
101244476	NC_015440.2	chr3	61680747	61684565
101244479	NC_015441.2	chr4	4638677	4641761
101244482	NC_015441.2	chr4	58488204	58495638
101244485	NC_015442.2	chr5	6972905	6980154
101244489	NC_015442.2	chr5	63917203	63918610
101244493	NC_015443.2	chr6	44661969	44666036
101244496	NC_015443.2	chr6	48330837	48332956
101244502	NC_015444.2	chr7	61321724	61324264
101244503	NC_015444.2	chr7	55528477	55529419
101244506	NC_015444.2	chr7	66743644	66747975
101244511	NC_015445.2	chr8	54466830	54478492
101244515	NC_015445.2	chr8	60201110	60204060
101244523	NC_015438.2	chr1	78591605	78594233
101244528	NC_015446.2	chr9	69453044	69454868
101244531	NC_015438.2	chr1	95687242	95692413
101244533	NC_015438.2	chr1	97027160	97032716
101244534	NC_015438.2	chr1	97890362	97894681
101244537	NC_015439.2	chr2	14934618	14938389
101244540	NC_015447.2	chr10	63257305	63261409
101244544	NC_015439.2	chr2	46827393	46829183
101244545	NC_015439.2	chr2	45890568	45896517
101244547	NC_015439.2	chr2	39342527	39347182
101244548	NC_015439.2	chr2	38262147	38266717
101244550	NC_015439.2	chr2	37395854	37402894
101244551	NC_015439.2	chr2	46572377	46573422
101244557	NC_015449.2	chr12	12037650	12038643
101244561	NC_015440.2	chr3	59613028	59627301
101244566	NC_015440.2	chr3	67072051	67073683
101244569	NC_015440.2	chr3	67654039	67657200
101244570	NC_015441.2	chr4	2511290	2515180
101244571	NC_015441.2	chr4	1518454	1522928
101244573	NC_015441.2	chr4	52560083	52571860
101244576	NC_015441.2	chr4	61998577	62003039
101244577	NC_015441.2	chr4	63161503	63163027
101244582	NC_015442.2	chr5	2229669	2231640
101244584	NC_015442.2	chr5	3371962	3373317
101244587	NC_015442.2	chr5	60869945	60882092
101244589	NC_015443.2	chr6	2380190	2390845
101244592	NC_015443.2	chr6	47441565	47445913
101244595	NC_015443.2	chr6	48935149	48940225
101244598	NC_015444.2	chr7	59543370	59546110
101244600	NC_015444.2	chr7	61425258	61426476
101244601	NC_015444.2	chr7	65994566	65997313
101244604	NC_015445.2	chr8	50156222	50159142
101244605	NC_015445.2	chr8	64706806	64709063
101244614	NC_015446.2	chr9	70308169	70313092
101244615	NC_015438.2	chr1	87644184	87651068
101244616	NC_015446.2	chr9	71358196	71362704
101244617	NC_015438.2	chr1	88570852	88573263
101244619	NC_015447.2	chr10	3177964	3185451
101244621	NC_015447.2	chr10	721982	725154
101244624	NC_015438.2	chr1	83220761	83221525
101244628	NC_015447.2	chr10	59295573	59299670
101244630	NC_015447.2	chr10	61954390	61958394
101244632	NC_015439.2	chr2	53258506	53262423
101244634	NC_015439.2	chr2	50485064	50487804
101244635	NC_015448.2	chr11	1276862	1277585
101244636	NC_015439.2	chr2	42302474	42305895
101244638	NC_015439.2	chr2	50222164	50225772
101244639	NC_015448.2	chr11	53430166	53432988
101244640	NC_015440.2	chr3	1613173	1619488
101244642	NC_015449.2	chr12	5274513	5277104
101244650	NC_015440.2	chr3	70453194	70454622
101244651	NC_015440.2	chr3	69563374	69564342
101244653	NC_015449.2	chr12	64953420	64960422
101244654	NC_015440.2	chr3	68130684	68136476
101244656	NC_015441.2	chr4	3397030	3398805
101244658	NC_015441.2	chr4	55280466	55296125
101244659	NC_015441.2	chr4	60811376	60812795
101244660	NC_015441.2	chr4	64102907	64104802
101244661	NC_015441.2	chr4	65725737	65728484
101244662	NC_015441.2	chr4	60743780	60745241
101244663	NC_015442.2	chr5	74975	78676
101244664	NC_015442.2	chr5	4244685	4252176
101244665	NC_015442.2	chr5	10696788	10698682
101244671	NC_015443.2	chr6	35606955	35612105
101244674	NC_015443.2	chr6	42837582	42839856
101244676	NC_015443.2	chr6	44939096	44940969
101244677	NC_015443.2	chr6	49675111	49676806
101244678	NC_015443.2	chr6	48041365	48042298
101244682	NC_015444.2	chr7	63306457	63308787
101244686	NC_015444.2	chr7	66104788	66112061
101244691	NC_015445.2	chr8	56453038	56455291
101244692	NC_015445.2	chr8	57968481	57969966
101244696	NC_015445.2	chr8	58592783	58600033
101244697	NC_015438.2	chr1	2375084	2377792
101244699	NC_015438.2	chr1	1602724	1608126
101244700	NC_015446.2	chr9	19185738	19189409
101244708	NC_015446.2	chr9	65557802	65561924
101244709	NC_015446.2	chr9	67906189	67907020
101244710	NC_015438.2	chr1	84610973	84615405
101244714	NC_015438.2	chr1	91251883	91252599
101244720	NC_015438.2	chr1	96656382	96657473
101244725	NC_015447.2	chr10	60900204	60902153
101244727	NC_015447.2	chr10	63653085	63664645
101244729	NC_015448.2	chr11	1538652	1544846
101244740	NC_015448.2	chr11	52536884	52542517
101244747	NC_015440.2	chr3	3411958	3414130
101244748	NC_015440.2	chr3	5032205	5035177
101244749	NC_015449.2	chr12	2768265	2769951
101244750	NC_015440.2	chr3	8196716	8208025
101244751	NC_015449.2	chr12	38715122	38716989
101244752	NC_015440.2	chr3	52495469	52498404
101244755	NC_015440.2	chr3	68822219	68825895
101244758	NC_015440.2	chr3	65887442	65889372
101244759	NC_015440.2	chr3	63464052	63469171
101244761	NC_015440.2	chr3	61677468	61680520
101244764	NC_015441.2	chr4	4632272	4636275
101244765	NC_015441.2	chr4	219343	222961
101244766	NC_015441.2	chr4	55093228	55097997
101244769	NC_015441.2	chr4	59605460	59610064
101244770	NC_015442.2	chr5	3102689	3104655
101244773	NC_015442.2	chr5	63308141	63309086
101244776	NC_015443.2	chr6	37442339	37446125
101244777	NC_015443.2	chr6	39644090	39647184
101244783	NC_015444.2	chr7	2762479	2767325
101244786	NC_015444.2	chr7	62349250	62350111
101244788	NC_015444.2	chr7	67457159	67461067
101244796	NC_015445.2	chr8	61909012	61912345
101244797	NC_015445.2	chr8	60494292	60496657
101244801	NC_015438.2	chr1	427685	430371
101244802	NC_015446.2	chr9	591900	597024
101244804	NC_015438.2	chr1	77576630	77581990
101244805	NC_015438.2	chr1	78611492	78617187
101244808	NC_015438.2	chr1	82039103	82044566
101244809	NC_015438.2	chr1	83305025	83306665
101244810	NC_015446.2	chr9	69462530	69463982
101244811	NC_015446.2	chr9	71794487	71804999
101244813	NC_015438.2	chr1	95679637	95680776
101244817	NC_015447.2	chr10	42751105	42753214
101244820	NC_015439.2	chr2	4334672	4353575
101244825	NC_015439.2	chr2	49648683	49657491
101244826	NC_015448.2	chr11	2610659	2611483
101244827	NC_015439.2	chr2	46823749	46825695
101244831	NC_015439.2	chr2	39357641	39360826
101244837	NC_015439.2	chr2	35292269	35293714
101244840	NC_015440.2	chr3	46347207	46356554
101244843	NC_015449.2	chr12	11252330	11254483
101244853	NC_015449.2	chr12	65297821	65300586
101244854	NC_015440.2	chr3	67074453	67079150
101244859	NC_015441.2	chr4	1515418	1518069
101244863	NC_015441.2	chr4	55819762	55821460
101244864	NC_015441.2	chr4	61990402	61993247
101244865	NC_015441.2	chr4	63182486	63183829
101244870	NC_015442.2	chr5	2238325	2239298
101244871	NC_015442.2	chr5	5634312	5638592
101244879	NC_015443.2	chr6	47438715	47441468
101244881	NC_015443.2	chr6	42027453	42029281
101244883	NC_015443.2	chr6	42176095	42188610
101244884	NC_015443.2	chr6	48927266	48928929
101244886	NC_015444.2	chr7	64287580	64289332
101244892	NC_015445.2	chr8	49619382	49622517
101244893	NC_015445.2	chr8	64695816	64697662
101244894	NC_015445.2	chr8	60811265	60812107
101244902	NC_015446.2	chr9	69023255	69025734
101244906	NC_015438.2	chr1	88575307	88580563
101244908	NC_015447.2	chr10	3158035	3161833
101244911	NC_015438.2	chr1	83284779	83291731
101244918	NC_015447.2	chr10	64894502	64896848
101244919	NC_015439.2	chr2	53249648	53251306
101244923	NC_015439.2	chr2	43120009	43121908
101244924	NC_015439.2	chr2	42285387	42293960
101244925	NC_015439.2	chr2	34275257	34277766
101244926	NC_015439.2	chr2	50211142	50220739
101244930	NC_015440.2	chr3	1619599	1626604
101244935	NC_015440.2	chr3	55542711	55547505
101244938	NC_015449.2	chr12	64232163	64234795
101244939	NC_015440.2	chr3	70450720	70452952
101244940	NC_015440.2	chr3	69552049	69557097
101244941	NC_015449.2	chr12	65647685	65651480
101244943	NC_015440.2	chr3	67616756	67621200
101244945	NC_015440.2	chr3	62636951	62644756
101244946	NC_015441.2	chr4	3390239	3396931
101244948	NC_015441.2	chr4	55261543	55267372
101244954	NC_015442.2	chr5	10702010	10704692
101244957	NC_015442.2	chr5	65712259	65713605
101244958	NC_015442.2	chr5	58047400	58049381
101244962	NC_015443.2	chr6	45367697	45370532
101244972	NC_015444.2	chr7	65175103	65182067
101244974	NC_015445.2	chr8	1184454	1185702
101244976	NC_015445.2	chr8	26846209	26848107
101244977	NC_015445.2	chr8	56460667	56476799
101244981	NC_015445.2	chr8	58582293	58582960
101244982	NC_015438.2	chr1	2369278	2373496
101244985	NC_015438.2	chr1	472482	477313
101244988	NC_015446.2	chr9	1257201	1262518
101244989	NC_015438.2	chr1	76155601	76156158
101244994	NC_015438.2	chr1	84616792	84621836
101244998	NC_015438.2	chr1	91265067	91266432
101245002	NC_015438.2	chr1	93401211	93404700
101245005	NC_015438.2	chr1	97198614	97201475
101245007	NC_015438.2	chr1	90049157	90052438
101245012	NC_015447.2	chr10	63664877	63667377
101245014	NC_015448.2	chr11	1546134	1548840
101245018	NC_015448.2	chr11	8769758	8774062
101245022	NC_015439.2	chr2	40316497	40319592
101245023	NC_015448.2	chr11	50927115	50936376
101245024	NC_015439.2	chr2	53239421	53243110
101245025	NC_015448.2	chr11	52547030	52562986
101245026	NC_015448.2	chr11	54685992	54691123
101245027	NC_015439.2	chr2	43323725	43328541
101245032	NC_015440.2	chr3	3407867	3409477
101245033	NC_015440.2	chr3	5102285	5104225
101245034	NC_015449.2	chr12	2776576	2779468
101245035	NC_015440.2	chr3	8226120	8228861
101245037	NC_015440.2	chr3	52492668	52493893
101245039	NC_015449.2	chr12	40123920	40129972
101245042	NW_004194417.1	-	17121	19996
101245044	NC_015440.2	chr3	64382332	64387544
101245045	NC_015440.2	chr3	63443166	63444618
101245048	NC_015440.2	chr3	64515770	64521500
101245049	NC_015441.2	chr4	5924506	5926992
101245050	NC_015441.2	chr4	4624976	4631127
101245051	NC_015441.2	chr4	192444	195957
101245052	NC_015441.2	chr4	55064580	55067238
101245058	NC_015442.2	chr5	6680428	6685592
101245065	NC_015443.2	chr6	24377246	24379077
101245071	NC_015443.2	chr6	48302521	48312377
101245073	NC_015444.2	chr7	2774741	2776876
101245074	NC_015444.2	chr7	62346078	62347013
101245078	NC_015444.2	chr7	66732468	66739314
101245084	NC_015445.2	chr8	61912269	61914263
101245085	NC_015438.2	chr1	3821359	3822745
101245086	NC_015445.2	chr8	63054192	63057509
101245093	NC_015438.2	chr1	78617566	78618782
101245102	NC_015438.2	chr1	96994473	97000909
101245105	NC_015438.2	chr1	86884413	86886840
101245108	NC_015439.2	chr2	14985256	15006495
101245109	NC_015447.2	chr10	59330222	59331329
101245111	NC_015439.2	chr2	54690653	54691603
101245113	NC_015447.2	chr10	63332205	63335729
101245114	NC_015439.2	chr2	51333337	51336963
101245115	NC_015448.2	chr11	591044	592949
101245119	NC_015439.2	chr2	45877802	45879330
101245121	NC_015439.2	chr2	39340101	39341449
101245123	NC_015439.2	chr2	38246757	38248657
101245130	NC_015449.2	chr12	1348502	1353657
101245131	NC_015440.2	chr3	465176	468272
101245134	NC_015449.2	chr12	4379694	4380293
101245139	NC_015449.2	chr12	43907661	43910321
101245142	NC_015440.2	chr3	59152366	59163063
101245143	NC_015449.2	chr12	66930240	66933442
101245145	NC_015449.2	chr12	65264898	65267357
101245147	NW_004196536.1	-	970	2423
101245148	NC_015440.2	chr3	67551848	67555102
101245153	NC_015441.2	chr4	47690851	47692687
101245156	NC_015441.2	chr4	61993797	61998130
101245157	NC_015441.2	chr4	63184658	63186197
101245158	NC_015441.2	chr4	64106162	64108120
101245159	NC_015441.2	chr4	64676098	64677580
101245163	NC_015442.2	chr5	2237404	2239418
101245166	NC_015442.2	chr5	64982746	64985494
101245171	NC_015443.2	chr6	4786592	4792847
101245174	NC_015443.2	chr6	41989091	41995665
101245178	NC_015443.2	chr6	48923602	48926620
101245180	NC_015444.2	chr7	5103974	5107240
101245182	NC_015444.2	chr7	59535169	59543047
101245191	NC_015445.2	chr8	60793658	60794710
101245193	NC_015446.2	chr9	18643615	18655281
101245198	NC_015438.2	chr1	65537670	65540314
101245200	NC_015446.2	chr9	66956081	66959241
101245202	NC_015446.2	chr9	69021297	69023160
101245204	NC_015446.2	chr9	70325295	70327704
101245205	NC_015438.2	chr1	87657398	87659670
101245206	NC_015438.2	chr1	89536278	89537533
101245207	NC_015447.2	chr10	3151055	3152392
101245208	NC_015447.2	chr10	337720	339401
101245209	NC_015447.2	chr10	4472974	4473310
101245210	NC_015438.2	chr1	94892860	94895715
101245212	NC_015438.2	chr1	93890819	93894976
101245213	NC_015447.2	chr10	60313107	60316922
101245215	NC_015439.2	chr2	54006091	54008699
101245217	NC_015439.2	chr2	53225485	53232684
101245223	NC_015439.2	chr2	43106296	43107389
101245224	NC_015439.2	chr2	35834837	35840781
101245229	NC_015440.2	chr3	1631530	1637720
101245230	NC_015440.2	chr3	5029345	5032021
101245233	NC_015440.2	chr3	55548233	55549537
101245238	NC_015440.2	chr3	70434536	70441683
101245239	NC_015440.2	chr3	69557255	69562465
101245240	NC_015449.2	chr12	65633009	65635669
101245242	NC_015440.2	chr3	67643861	67649066
101245244	NC_015440.2	chr3	62645372	62647232
101245251	NC_015441.2	chr4	60822249	60824220
101245252	NC_015442.2	chr5	107802	110824
101245253	NC_015442.2	chr5	4278108	4279325
101245264	NC_015443.2	chr6	40977081	40979480
101245265	NC_015443.2	chr6	44901958	44905513
101245266	NC_015443.2	chr6	47995253	48004526
101245272	NC_015445.2	chr8	3285883	3287385
101245274	NC_015445.2	chr8	56476989	56481687
101245275	NC_015445.2	chr8	58005983	58006574
101245276	NC_015445.2	chr8	54445634	54465109
101245278	NC_015445.2	chr8	63679100	63683852
101245279	NC_015445.2	chr8	58559025	58565092
101245280	NC_015438.2	chr1	2342697	2349626
101245290	NC_015446.2	chr9	67952967	67954776
101245292	NC_015446.2	chr9	71054312	71067490
101245296	NC_015438.2	chr1	92264923	92268553
101245297	NC_015447.2	chr10	1293920	1295725
101245299	NC_015447.2	chr10	7363815	7367197
101245301	NC_015438.2	chr1	97465069	97466163
101245302	NC_015447.2	chr10	51521670	51529237
101245307	NC_015447.2	chr10	62763691	62766265
101245309	NC_015439.2	chr2	52252501	52253321
101245314	NC_015448.2	chr11	5663991	5666787
101245315	NC_015448.2	chr11	8774178	8778292
101245316	NC_015439.2	chr2	44044563	44046973
101245317	NC_015439.2	chr2	42281627	42285509
101245319	NC_015439.2	chr2	41351621	41354667
101245320	NC_015439.2	chr2	40303886	40306924
101245323	NC_015439.2	chr2	53237618	53238845
101245324	NC_015448.2	chr11	52596053	52602814
101245326	NC_015439.2	chr2	43169952	43170737
101245328	NC_015448.2	chr11	53184770	53190136
101245330	NC_015440.2	chr3	3402354	3407763
101245335	NC_015440.2	chr3	52466388	52468108
101245338	NC_015440.2	chr3	68816362	68822001
101245339	NC_015440.2	chr3	67081464	67083266
101245340	NC_015440.2	chr3	66258592	66269802
101245342	NC_015440.2	chr3	65140231	65141725
101245343	NC_015440.2	chr3	64372092	64379303
101245344	NC_015440.2	chr3	63433378	63436442
101245346	NC_015440.2	chr3	61656807	61660014
101245357	NC_015442.2	chr5	3120114	3123548
101245362	NC_015442.2	chr5	64212333	64222052
101245381	NC_015444.2	chr7	66727882	66728714
101245384	NC_015445.2	chr8	287838	290271
101245387	NC_015445.2	chr8	62805170	62810410
101245397	NC_015446.2	chr9	64519586	64528600
101245398	NC_015438.2	chr1	82067383	82071910
101245399	NC_015446.2	chr9	69460441	69462438
101245400	NC_015446.2	chr9	71398640	71400175
101245401	NC_015438.2	chr1	88581409	88583132
101245405	NC_015438.2	chr1	96371874	96379753
101245413	NC_015439.2	chr2	54682336	54685306
101245414	NC_015447.2	chr10	63342361	63354463
101245415	NC_015439.2	chr2	51314207	51315980
101245418	NC_015439.2	chr2	46807548	46810357
101245421	NC_015439.2	chr2	39337883	39338907
101245425	NC_015439.2	chr2	37352275	37353948
101245429	NC_015440.2	chr3	614353	619012
101245431	NC_015440.2	chr3	499954	500619
101245434	NC_015449.2	chr12	4383825	4385264
101245440	NC_015449.2	chr12	43858134	43879475
101245442	NC_015440.2	chr3	59855515	59869380
101245443	NC_015449.2	chr12	67015211	67021031
101245452	NC_015441.2	chr4	47593156	47598052
101245454	NC_015441.2	chr4	62016868	62021423
101245458	NC_015442.2	chr5	5639294	5642272
101245462	NC_015443.2	chr6	1338684	1348798
101245470	NC_015443.2	chr6	49670227	49671112
101245471	NC_015443.2	chr6	48920263	48922976
101245473	NC_015444.2	chr7	64283865	64285463
101245477	NC_015445.2	chr8	1188302	1206720
101245481	NC_015445.2	chr8	64621244	64623395
101245491	NC_015446.2	chr9	54213314	54221647
101245495	NC_015446.2	chr9	69026498	69027579
101245496	NC_015438.2	chr1	85657910	85659610
101245497	NC_015438.2	chr1	86591981	86595183
101245498	NC_015446.2	chr9	70330028	70334394
101245500	NC_015438.2	chr1	89541790	89545603
101245503	NC_015447.2	chr10	784480	785727
101245506	NC_015438.2	chr1	83385028	83386702
101245513	NC_015447.2	chr10	65350138	65352719
101245514	NC_015439.2	chr2	53220096	53225071
101245516	NC_015439.2	chr2	48636136	48643886
101245517	NC_015439.2	chr2	45119547	45125968
101245519	NC_015439.2	chr2	43091976	43099135
101245520	NC_015439.2	chr2	35825820	35829780
101245521	NC_015439.2	chr2	50167290	50167930
101245523	NC_015440.2	chr3	1637670	1638939
101245530	NC_015440.2	chr3	59210360	59212667
101245532	NC_015449.2	chr12	65622857	65624512
101245535	NW_004194560.1	-	1313	6967
101245536	NC_015440.2	chr3	62629678	62631357
101245541	NC_015441.2	chr4	65753631	65754352
101245542	NC_015441.2	chr4	61083265	61098143
101245544	NC_015442.2	chr5	4273903	4278147
101245550	NC_015443.2	chr6	34138796	34139580
101245553	NC_015443.2	chr6	45355070	45359193
101245554	NC_015443.2	chr6	44623511	44624880
101245555	NC_015443.2	chr6	42807391	42814010
101245557	NC_015443.2	chr6	44878102	44879315
101245558	NC_015444.2	chr7	10406707	10414113
101245561	NC_015444.2	chr7	63291843	63294932
101245564	NC_015444.2	chr7	65160789	65163636
101245567	NC_015445.2	chr8	3286347	3291635
101245569	NC_015445.2	chr8	56481608	56485571
101245573	NC_015445.2	chr8	63674952	63678293
101245577	NC_015438.2	chr1	571850	574879
101245582	NC_015446.2	chr9	61757754	61760620
101245583	NC_015446.2	chr9	64202828	64204126
101245588	NC_015438.2	chr1	90425452	90426955
101245596	NC_015447.2	chr10	51382303	51385287
101245602	NC_015439.2	chr2	52237549	52238411
101245605	NC_015439.2	chr2	47842535	47848542
101245608	NC_015448.2	chr11	5666908	5673158
101245618	NC_015448.2	chr11	52628109	52636182
101245619	NC_015448.2	chr11	54633733	54639384
101245623	NC_015449.2	chr12	387609	390136
101245625	NC_015449.2	chr12	2943252	2948728
101245626	NC_015449.2	chr12	38615800	38617335
101245631	NC_015440.2	chr3	67079286	67080438
101245632	NC_015440.2	chr3	66256944	66257610
101245634	NC_015440.2	chr3	64368880	64371247
101245635	NW_004195537.1	-	121	1445
101245636	NC_015440.2	chr3	64444359	64444899
101245637	NC_015441.2	chr4	5891704	5897393
101245644	NC_015441.2	chr4	64108277	64112422
101245645	NC_015441.2	chr4	64749909	64751373
101245646	NC_015442.2	chr5	2242513	2245851
101245647	NC_015442.2	chr5	3124101	3131105
101245648	NC_015442.2	chr5	7009966	7014056
101245649	NC_015442.2	chr5	22328129	22340854
101245658	NC_015443.2	chr6	24350855	24356913
101245659	NC_015443.2	chr6	36244217	36247413
101245672	NC_015444.2	chr7	62315124	62322405
101245673	NC_015444.2	chr7	55432113	55432976
101245674	NC_015444.2	chr7	57667023	57668525
101245675	NC_015444.2	chr7	67415025	67418253
101245683	NC_015445.2	chr8	62810578	62816637
101245684	NC_015445.2	chr8	59967223	59968847
101245689	NC_015438.2	chr1	181458	183087
101245692	NC_015438.2	chr1	77413745	77427752
101245693	NC_015438.2	chr1	78675066	78677748
101245695	NC_015446.2	chr9	64544283	64550052
101245697	NC_015446.2	chr9	69440009	69442863
101245702	NC_015438.2	chr1	96484807	96488778
101245703	NC_015438.2	chr1	97940283	97946146
101245713	NC_015448.2	chr11	604743	607441
101245715	NC_015439.2	chr2	46803253	46804028
101245716	NC_015439.2	chr2	45859396	45862459
101245722	NC_015439.2	chr2	37342371	37344918
101245725	NC_015439.2	chr2	46126067	46139387
101245729	NC_015440.2	chr3	540959	541909
101245731	NC_015449.2	chr12	3337901	3341444
101245733	NC_015440.2	chr3	2874653	2877392
101245735	NC_015440.2	chr3	9352870	9354528
101245741	NC_015449.2	chr12	64253953	64258736
101245743	NC_015440.2	chr3	70419568	70422663
101245755	NC_015441.2	chr4	60824464	60831909
101245756	NC_015441.2	chr4	62021558	62026896
101245759	NC_015441.2	chr4	64916068	64920639
101245760	NC_015442.2	chr5	1112200	1117442
101245769	NC_015443.2	chr6	41987288	41988544
101245770	NC_015443.2	chr6	41949215	41950634
101245771	NC_015443.2	chr6	49650590	49653335
101245772	NC_015443.2	chr6	48914020	48919050
101245781	NC_015445.2	chr8	26737081	26738255
101245784	NC_015445.2	chr8	64607868	64610030
101245785	NC_015445.2	chr8	60742328	60745504
101245786	NC_015438.2	chr1	6505435	6517745
101245788	NC_015446.2	chr9	2333224	2337517
101245790	NC_015446.2	chr9	1377428	1380774
101245794	NC_015446.2	chr9	66946940	66949847
101245798	NC_015446.2	chr9	70334789	70341410
101245799	NC_015438.2	chr1	87683509	87686803
101245801	NC_015447.2	chr10	3135322	3137784
101245807	NC_015438.2	chr1	83431758	83437625
101245813	NC_015447.2	chr10	59514585	59521207
101245814	NC_015439.2	chr2	45084171	45096580
101245816	NC_015448.2	chr11	1397371	1400539
101245819	NC_015439.2	chr2	38745328	38757072
101245820	NC_015440.2	chr3	1644453	1646354
101245821	NC_015449.2	chr12	2271531	2280161
101245826	NC_015440.2	chr3	50173151	50178761
101245828	NC_015440.2	chr3	55515729	55535719
101245829	NC_015449.2	chr12	65616160	65620365
101245831	NC_015440.2	chr3	67780245	67784058
101245833	NC_015440.2	chr3	62619657	62621104
101245836	NC_015441.2	chr4	55237099	55242351
101245844	NC_015442.2	chr5	262480	266999
101245851	NC_015443.2	chr6	46208628	46212838
101245852	NC_015443.2	chr6	45342349	45354736
101245858	NC_015444.2	chr7	63273360	63277869
101245860	NC_015444.2	chr7	45555114	45559280
101245861	NC_015444.2	chr7	65155821	65160653
101245880	NC_015446.2	chr9	61774251	61775781
101245881	NC_015438.2	chr1	81018802	81026667
101245882	NC_015446.2	chr9	64207274	64212062
101245885	NC_015438.2	chr1	84681322	84687964
101245888	NC_015438.2	chr1	91289776	91293833
101245895	NC_015438.2	chr1	97213222	97214142
101245898	NC_015438.2	chr1	90256758	90257898
101245900	NC_015447.2	chr10	62784790	62785826
101245902	NC_015439.2	chr2	52231265	52236674
101245903	NC_015448.2	chr11	1576416	1581148
101245904	NC_015439.2	chr2	47816548	47817970
101245908	NC_015448.2	chr11	8890973	8907239
101245911	NC_015439.2	chr2	41690811	41698544
101245912	NC_015439.2	chr2	40292392	40297543
101245913	NC_015448.2	chr11	33247355	33249195
101245919	NC_015439.2	chr2	43082855	43083800
101245922	NC_015449.2	chr12	402614	411512
101245923	NC_015449.2	chr12	1385877	1393609
101245933	NC_015440.2	chr3	64997008	65000866
101245934	NC_015440.2	chr3	64355450	64356633
101245935	NW_004195537.1	-	1007	3230
101245937	NC_015441.2	chr4	5888521	5892603
101245938	NC_015441.2	chr4	4578336	4586330
101245940	NC_015441.2	chr4	59709071	59712916
101245941	NC_015441.2	chr4	64113168	64116600
101245942	NC_015441.2	chr4	64738694	64739395
101245943	NC_015442.2	chr5	2246214	2252827
101245954	NC_015443.2	chr6	36253496	36261388
101245956	NC_015443.2	chr6	40142603	40145151
101245957	NC_015443.2	chr6	39068806	39073795
101245959	NC_015443.2	chr6	38810292	38813716
101245960	NC_015443.2	chr6	48285889	48288974
101245961	NC_015444.2	chr7	577470	588389
101245963	NC_015444.2	chr7	2838422	2840741
101245968	NC_015444.2	chr7	67418623	67421710
101245969	NC_015444.2	chr7	66708133	66709725
101245970	NC_015444.2	chr7	65964689	65966322
101245972	NC_015445.2	chr8	338189	347483
101245973	NC_015445.2	chr8	50570164	50572497
101245979	NC_015438.2	chr1	153957	155258
101245980	NC_015446.2	chr9	508491	510228
101245986	NC_015438.2	chr1	78694568	78702057
101245993	NC_015446.2	chr9	72303469	72308497
101245998	NC_015447.2	chr10	59389309	59390263
101246004	NC_015439.2	chr2	51306490	51308501
101246005	NC_015439.2	chr2	50460133	50467468
101246007	NC_015439.2	chr2	48626235	48632149
101246010	NC_015439.2	chr2	43086655	43091857
101246012	NC_015448.2	chr11	23050830	23056838
101246019	NC_015439.2	chr2	46071037	46072154
101246021	NC_015439.2	chr2	35243733	35245567
101246023	NC_015440.2	chr3	571711	573384
101246027	NC_015440.2	chr3	2862316	2870958
101246031	NC_015449.2	chr12	63222923	63223649
101246034	NC_015449.2	chr12	66980140	66983965
101246035	NC_015440.2	chr3	70411281	70418213
101246039	NC_015440.2	chr3	63431699	63433053
101246041	NC_015440.2	chr3	67237978	67240633
101246044	NC_015441.2	chr4	3352033	3357801
101246050	NC_015441.2	chr4	63236692	63238841
101246051	NC_015441.2	chr4	66394549	66399111
101246055	NC_015442.2	chr5	10767228	10772376
101246066	NC_015443.2	chr6	49642058	49650461
101246067	NC_015443.2	chr6	48908297	48913941
101246070	NC_015444.2	chr7	59520786	59522263
101246079	NC_015438.2	chr1	496452	499282
101246083	NC_015446.2	chr9	1356813	1361129
101246086	NC_015438.2	chr1	79849212	79859307
101246089	NC_015438.2	chr1	86034012	86052624
101246092	NC_015438.2	chr1	87701434	87704377
101246093	NC_015438.2	chr1	90427780	90431354
101246095	NC_015447.2	chr10	937663	940426
101246097	NC_015438.2	chr1	94914157	94917005
101246098	NC_015438.2	chr1	83532110	83534751
101246102	NC_015447.2	chr10	62012825	62014709
101246105	NC_015447.2	chr10	59526905	59527712
101246108	NC_015439.2	chr2	35795039	35804273
101246120	NC_015449.2	chr12	64904093	64907746
101246121	NC_015440.2	chr3	67683660	67685684
101246124	NC_015440.2	chr3	62609325	62613223
101246129	NC_015441.2	chr4	55224949	55228582
101246130	NC_015441.2	chr4	52470254	52476107
101246132	NC_015441.2	chr4	58540412	58543859
101246133	NC_015441.2	chr4	65771884	65777012
101246135	NC_015442.2	chr5	141269	144986
101246140	NC_015442.2	chr5	64972477	64975469
101246143	NC_015442.2	chr5	57422919	57426379
101246146	NC_015443.2	chr6	35772823	35775544
101246149	NC_015443.2	chr6	44605670	44607514
101246152	NC_015443.2	chr6	44870733	44872875
101246153	NC_015444.2	chr7	10517264	10530409
101246155	NC_015444.2	chr7	63276747	63288251
101246157	NC_015444.2	chr7	65075808	65080996
101246167	NC_015445.2	chr8	63653449	63658723
101246172	NC_015438.2	chr1	344787	346463
101246177	NC_015438.2	chr1	81029061	81037637
101246180	NC_015446.2	chr9	67975266	67976313
101246186	NC_015438.2	chr1	92288926	92294623
101246188	NC_015438.2	chr1	93217448	93218662
101246189	NC_015438.2	chr1	95736364	95742696
101246191	NC_015438.2	chr1	97946967	97950641
101246196	NC_015447.2	chr10	63715735	63721563
101246198	NC_015439.2	chr2	52220182	52221614
101246200	NC_015439.2	chr2	47798391	47812291
101246203	NC_015448.2	chr11	8955141	8964501
101246204	NC_015439.2	chr2	42250553	42255749
101246207	NC_015439.2	chr2	40287198	40289871
101246211	NC_015448.2	chr11	52652511	52657556
101246212	NC_015448.2	chr11	54559933	54563222
101246222	NC_015440.2	chr3	8446819	8450569
101246226	NC_015440.2	chr3	52438178	52438853
101246230	NC_015449.2	chr12	66355449	66359955
101246233	NC_015440.2	chr3	65826710	65829225
101246234	NC_015440.2	chr3	64336911	64344434
101246235	NW_004195539.1	-	1303	3211
101246242	NC_015441.2	chr4	64117041	64119600
101246243	NC_015441.2	chr4	64844713	64846058
101246245	NC_015442.2	chr5	3156877	3159918
101246249	NC_015442.2	chr5	64171108	64173117
101246254	NC_015443.2	chr6	36263393	36265996
101246255	NC_015443.2	chr6	47404280	47407274
101246256	NC_015443.2	chr6	40146470	40148853
101246257	NC_015443.2	chr6	39015361	39017455
101246259	NC_015443.2	chr6	38769759	38771089
101246260	NC_015443.2	chr6	48273778	48281314
101246265	NC_015444.2	chr7	58079366	58083952
101246274	NC_015438.2	chr1	151481	152345
101246275	NC_015446.2	chr9	503964	505515
101246281	NC_015446.2	chr9	65513951	65520332
101246285	NC_015447.2	chr10	174763	180469
101246286	NC_015438.2	chr1	97493179	97499355
101246292	NC_015447.2	chr10	59400623	59404706
101246295	NC_015447.2	chr10	61377943	61379521
101246296	NC_015439.2	chr2	3272239	3273098
101246297	NC_015439.2	chr2	54662406	54664120
101246300	NC_015448.2	chr11	647506	653789
101246301	NC_015439.2	chr2	48624368	48625992
101246304	NC_015439.2	chr2	45841813	45844581
101246305	NC_015439.2	chr2	45046718	45064296
101246306	NC_015439.2	chr2	43084428	43086225
101246309	NC_015439.2	chr2	39304015	39307107
101246311	NC_015439.2	chr2	37309304	37312368
101246317	NC_015440.2	chr3	3384172	3386907
101246318	NC_015449.2	chr12	4405375	4411930
101246319	NC_015440.2	chr3	2802015	2807628
101246321	NC_015440.2	chr3	35184940	35189337
101246324	NC_015449.2	chr12	63221118	63221731
101246328	NC_015440.2	chr3	70403876	70411064
101246330	NC_015449.2	chr12	65164134	65170909
101246333	NC_015440.2	chr3	63425874	63429680
101246336	NC_015441.2	chr4	625513	631361
101246340	NC_015441.2	chr4	56029658	56031114
101246341	NC_015441.2	chr4	60836998	60844847
101246342	NC_015441.2	chr4	62071099	62077467
101246346	NC_015442.2	chr5	5684571	5690028
101246347	NC_015442.2	chr5	10825588	10831275
101246350	NC_015443.2	chr6	24084593	24088550
101246354	NC_015443.2	chr6	41887609	41892451
101246355	NC_015443.2	chr6	49633043	49636096
101246359	NC_015444.2	chr7	64265548	64267204
101246360	NC_015444.2	chr7	59515140	59517569
101246361	NC_015445.2	chr8	361483	366872
101246366	NC_015445.2	chr8	60710774	60723547
101246377	NC_015446.2	chr9	66930946	66934791
101246381	NC_015446.2	chr9	70349900	70352148
101246383	NC_015447.2	chr10	3109171	3114179
101246390	NC_015447.2	chr10	62023025	62024856
101246393	NC_015447.2	chr10	64499883	64509119
101246394	NC_015439.2	chr2	53163687	53169670
101246397	NC_015448.2	chr11	5698836	5704908
101246400	NC_015439.2	chr2	35769569	35772072
101246404	NC_015449.2	chr12	2309759	2320096
101246405	NC_015449.2	chr12	5450509	5455564
101246410	NC_015449.2	chr12	64898921	64903842
101246411	NC_015440.2	chr3	67586585	67588529
101246418	NC_015441.2	chr4	52367281	52368291
101246420	NC_015441.2	chr4	58585732	58586737
101246422	NC_015441.2	chr4	65777128	65780358
101246423	NC_015441.2	chr4	61228251	61238761
101246424	NC_015442.2	chr5	135675	137088
101246426	NC_015442.2	chr5	7030815	7039617
101246428	NC_015442.2	chr5	65645487	65652948
101246430	NC_015442.2	chr5	62326489	62330221
101246431	NC_015442.2	chr5	60743792	60746983
101246432	NC_015442.2	chr5	57401069	57403730
101246434	NC_015443.2	chr6	5288964	5297547
101246440	NC_015443.2	chr6	42577849	42583675
101246446	NC_015444.2	chr7	45330757	45334707
101246450	NC_015444.2	chr7	65062658	65066761
101246457	NC_015445.2	chr8	58090969	58104705
101246458	NC_015445.2	chr8	54766312	54768640
101246459	NC_015445.2	chr8	63644381	63647195
101246461	NC_015438.2	chr1	2274408	2283894
101246467	NC_015446.2	chr9	61803968	61807503
101246471	NC_015446.2	chr9	67977071	67984509
101246472	NC_015438.2	chr1	84701866	84703789
101246475	NC_015438.2	chr1	91314369	91320086
101246476	NC_015447.2	chr10	2141795	2151955
101246477	NC_015438.2	chr1	92294806	92297183
101246479	NC_015438.2	chr1	93309813	93311130
101246480	NC_015447.2	chr10	6824583	6834206
101246489	NC_015439.2	chr2	52183712	52198799
101246492	NC_015448.2	chr11	3653979	3656102
101246494	NC_015448.2	chr11	9305834	9356786
101246498	NC_015439.2	chr2	40261272	40264598
101246502	NC_015448.2	chr11	52648801	52651455
101246504	NC_015448.2	chr11	54675046	54684213
101246510	NC_015449.2	chr12	3011307	3014705
101246511	NC_015440.2	chr3	8455274	8459143
101246512	NC_015449.2	chr12	43026312	43035825
101246514	NC_015440.2	chr3	53922429	53925232
101246516	NC_015449.2	chr12	40068278	40070028
101246518	NC_015440.2	chr3	59518987	59523394
101246519	NC_015440.2	chr3	66165887	66174888
101246521	NC_015440.2	chr3	65472030	65473582
101246526	NC_015441.2	chr4	4544866	4551109
101246529	NC_015441.2	chr4	59734926	59742260
101246536	NC_015443.2	chr6	3492430	3494555
101246538	NC_015443.2	chr6	36266133	36268811
101246542	NC_015443.2	chr6	47786157	47790302
101246547	NC_015444.2	chr7	62277479	62285712
101246550	NC_015444.2	chr7	65940057	65941528
101246560	NC_015438.2	chr1	64321597	64323308
101246564	NC_015438.2	chr1	82121789	82126372
101246565	NC_015446.2	chr9	65509811	65514027
101246567	NC_015438.2	chr1	88612419	88614852
101246571	NC_015438.2	chr1	96476758	96482111
101246573	NC_015438.2	chr1	86957638	86958997
101246575	NC_015439.2	chr2	15487051	15491093
101246577	NC_015439.2	chr2	26833583	26834763
101246578	NC_015447.2	chr10	60960809	60965575
101246579	NC_015439.2	chr2	2573372	2574646
101246580	NC_015439.2	chr2	54649367	54654385
101246581	NC_015447.2	chr10	63531321	63532406
101246585	NC_015439.2	chr2	48614525	48623973
101246586	NC_015448.2	chr11	2667051	2673449
101246587	NC_015439.2	chr2	46769579	46772921
101246588	NC_015439.2	chr2	45820490	45826306
101246590	NC_015448.2	chr11	4719846	4720759
101246592	NC_015439.2	chr2	39290140	39298065
101246594	NC_015439.2	chr2	34076031	34155694
101246599	NC_015440.2	chr3	593505	595884
101246605	NC_015449.2	chr12	63218470	63219144
101246610	NC_015440.2	chr3	70399313	70402697
101246614	NW_004194994.1	-	2793	3721
101246615	NC_015440.2	chr3	63420536	63422233
101246616	NC_015440.2	chr3	62602847	62607243
101246618	NC_015440.2	chr3	67188593	67193008
101246622	NC_015441.2	chr4	3339039	3343786
101246626	NC_015441.2	chr4	56043033	56045756
101246627	NC_015441.2	chr4	62077621	62078157
101246628	NC_015441.2	chr4	66402401	66411410
101246636	NC_015443.2	chr6	31164670	31176143
101246637	NC_015443.2	chr6	47398657	47401912
101246638	NC_015443.2	chr6	43772819	43776263
101246641	NC_015443.2	chr6	49631609	49632868
101246645	NC_015444.2	chr7	63251771	63264150
101246646	NC_015444.2	chr7	61114374	61115571
101246648	NC_015445.2	chr8	14313107	14326557
101246649	NC_015445.2	chr8	54574857	54576232
101246652	NC_015445.2	chr8	59894334	59896981
101246658	NC_015446.2	chr9	498300	500380
101246662	NC_015446.2	chr9	66925238	66929936
101246668	NC_015438.2	chr1	89576744	89599777
101246669	NC_015447.2	chr10	3108119	3110458
101246680	NC_015439.2	chr2	53969736	53972105
101246682	NC_015439.2	chr2	53162407	53163749
101246684	NC_015439.2	chr2	49590328	49594132
101246688	NC_015439.2	chr2	35755322	35761243
101246689	NC_015439.2	chr2	49974937	49975570
101246690	NC_015439.2	chr2	38617596	38621315
101246695	NC_015440.2	chr3	5104345	5111302
101246700	NC_015449.2	chr12	66351148	66355158
101246701	NC_015449.2	chr12	65585672	65587670
101246702	NC_015440.2	chr3	68196448	68200653
101246711	NC_015441.2	chr4	65780467	65785002
101246713	NC_015442.2	chr5	159147	162493
101246714	NC_015442.2	chr5	3165901	3168689
101246716	NC_015442.2	chr5	7049726	7063042
101246717	NC_015442.2	chr5	22619384	22640663
101246719	NC_015442.2	chr5	65641345	65643929
101246720	NC_015442.2	chr5	64952196	64955889
101246721	NC_015442.2	chr5	63210725	63214239
101246723	NC_015442.2	chr5	60738226	60742849
101246724	NC_015442.2	chr5	57387481	57393639
101246727	NC_015443.2	chr6	46152806	46154087
101246728	NC_015443.2	chr6	45313368	45320442
101246733	NC_015444.2	chr7	633877	640829
101246734	NC_015444.2	chr7	67404146	67409337
101246736	NC_015444.2	chr7	65059111	65061481
101246737	NC_015444.2	chr7	65727921	65729952
101246738	NC_015445.2	chr8	3360767	3366948
101246741	NC_015445.2	chr8	13377899	13384385
101246742	NC_015445.2	chr8	50753321	50764232
101246745	NC_015445.2	chr8	54787959	54790690
101246747	NC_015445.2	chr8	61842702	61849806
101246760	NC_015438.2	chr1	84714549	84718172
101246761	NC_015446.2	chr9	71444413	71447437
101246763	NC_015438.2	chr1	91372006	91376303
101246764	NC_015447.2	chr10	2135988	2138733
101246765	NC_015438.2	chr1	92317886	92319612
101246767	NC_015447.2	chr10	871366	877190
101246773	NC_015438.2	chr1	90554754	90559426
101246778	NC_015448.2	chr11	1598299	1601964
101246780	NC_015448.2	chr11	3662905	3668942
101246782	NC_015439.2	chr2	45037812	45044476
101246786	NC_015439.2	chr2	41307271	41312648
101246787	NC_015439.2	chr2	40252351	40261419
101246792	NC_015448.2	chr11	52656904	52659871
101246794	NC_015439.2	chr2	43020290	43023083
101246802	NC_015449.2	chr12	38525522	38533958
101246804	NC_015440.2	chr3	52401639	52406128
101246808	NC_015440.2	chr3	59970912	59973054
101246809	NC_015449.2	chr12	63295102	63295778
101246810	NC_015440.2	chr3	68755384	68756893
101246811	NC_015449.2	chr12	64890563	64897588
101246812	NC_015440.2	chr3	66139850	66142280
101246814	NC_015440.2	chr3	65159769	65161014
101246815	NC_015440.2	chr3	64305425	64308032
101246817	NC_015440.2	chr3	64195078	64203451
101246821	NC_015441.2	chr4	59757439	59758540
101246823	NC_015442.2	chr5	10832389	10835135
101246826	NC_015442.2	chr5	63610435	63612500
101246829	NC_015443.2	chr6	24216470	24217656
101246836	NC_015444.2	chr7	1746973	1748994
101246844	NC_015445.2	chr8	386136	390405
101246849	NC_015445.2	chr8	58479976	58486013
101246853	NC_015446.2	chr9	2298759	2301350
101246854	NC_015438.2	chr1	82803	87368
101246860	NC_015438.2	chr1	78750848	78755680
101246863	NC_015438.2	chr1	82131769	82140334
101246870	NC_015438.2	chr1	97083832	97086444
101246876	NC_015447.2	chr10	59472063	59475156
101246877	NC_015447.2	chr10	60906523	60912156
101246878	NC_015439.2	chr2	2536141	2573150
101246880	NC_015447.2	chr10	64698588	64711017
101246882	NC_015439.2	chr2	51245654	51250274
101246886	NC_015439.2	chr2	45826437	45832049
101246887	NC_015448.2	chr11	5706867	5715085
101246889	NC_015448.2	chr11	4777181	4783100
101246891	NC_015439.2	chr2	38192024	38192496
101246897	NC_015449.2	chr12	4417326	4423453
101246898	NC_015440.2	chr3	2702693	2704419
101246899	NC_015440.2	chr3	33383193	33386186
101246901	NC_015440.2	chr3	59505545	59510056
101246905	NC_015440.2	chr3	70384566	70394957
101246906	NC_015440.2	chr3	69477025	69481013
101246921	NC_015441.2	chr4	62081232	62083455
101246922	NC_015441.2	chr4	66411512	66413251
101246924	NC_015442.2	chr5	1144994	1156240
101246929	NC_015443.2	chr6	23966808	23969534
101246931	NC_015443.2	chr6	34250702	34252450
101246933	NC_015443.2	chr6	43769514	43771154
101246941	NC_015444.2	chr7	64244003	64245086
101246942	NC_015444.2	chr7	63249306	63252295
101246944	NC_015445.2	chr8	1243765	1246433
101246949	NC_015445.2	chr8	60539812	60543092
101246954	NC_015446.2	chr9	1315329	1316190
101246955	NC_015446.2	chr9	488121	495893
101246959	NC_015438.2	chr1	79915211	79923886
101246962	NC_015438.2	chr1	85760388	85771196
101246965	NC_015438.2	chr1	87725611	87733536
101246967	NC_015447.2	chr10	3093034	3105107
101246971	NC_015438.2	chr1	96743775	96745327
101246974	NC_015438.2	chr1	93968107	93971046
101246976	NC_015447.2	chr10	60360719	60361190
101246980	NC_015439.2	chr2	53966437	53969644
101246982	NC_015439.2	chr2	53150363	53151839
101246983	NC_015439.2	chr2	49585270	49588488
101246986	NC_015448.2	chr11	19000690	19005096
101246987	NC_015448.2	chr11	33034261	33045473
101246991	NC_015448.2	chr11	55547629	55552966
101246994	NC_015449.2	chr12	1441023	1446611
101246995	NC_015449.2	chr12	2334851	2339997
101246998	NC_015440.2	chr3	8491226	8493407
101247003	NC_015449.2	chr12	66302455	66307795
101247005	NC_015440.2	chr3	67881916	67889384
101247009	NC_015441.2	chr4	7319646	7320415
101247011	NC_015441.2	chr4	52291007	52296410
101247012	NC_015441.2	chr4	63259275	63260928
101247015	NC_015442.2	chr5	164775	168581
101247016	NC_015442.2	chr5	3147696	3152179
101247019	NC_015442.2	chr5	22680556	22699638
101247023	NC_015442.2	chr5	63208532	63209072
101247027	NC_015442.2	chr5	59985633	59987072
101247030	NC_015443.2	chr6	46122795	46124005
101247033	NC_015443.2	chr6	42589446	42592951
101247037	NC_015444.2	chr7	641224	647328
101247038	NC_015444.2	chr7	62269161	62277639
101247044	NC_015444.2	chr7	65630767	65631154
101247045	NC_015445.2	chr8	3392013	3394467
101247047	NC_015445.2	chr8	50764213	50766816
101247048	NC_015445.2	chr8	58125553	58127205
101247052	NC_015445.2	chr8	61794412	61801823
101247053	NC_015438.2	chr1	6355161	6360197
101247056	NC_015446.2	chr9	6840835	6841348
101247060	NC_015446.2	chr9	37751681	37763576
101247061	NC_015438.2	chr1	75714371	75717764
101247067	NC_015446.2	chr9	71449239	71452801
101247069	NC_015438.2	chr1	91379373	91388940
101247070	NC_015438.2	chr1	92320294	92322549
101247071	NC_015447.2	chr10	1215519	1221591
101247074	NC_015438.2	chr1	95761576	95766477
101247075	NC_015447.2	chr10	6724900	6727191
101247077	NC_015438.2	chr1	97975963	97979274
101247083	NC_015448.2	chr11	1596440	1597440
101247085	NC_015439.2	chr2	47750000	47752770
101247086	NC_015448.2	chr11	3669317	3677299
101247087	NC_015448.2	chr11	4798689	4801360
101247089	NC_015448.2	chr11	9675859	9684935
101247092	NC_015439.2	chr2	41983311	41994601
101247099	NC_015448.2	chr11	52666364	52675292
101247100	NC_015448.2	chr11	53492838	53494326
101247107	NC_015440.2	chr3	5425736	5432030
101247109	NC_015440.2	chr3	35254139	35267051
101247114	NC_015440.2	chr3	59730111	59730907
101247116	NC_015440.2	chr3	68743980	68748668
101247120	NC_015440.2	chr3	65362743	65363888
101247121	NC_015440.2	chr3	64297590	64303862
101247122	NC_015440.2	chr3	61594839	61599651
101247124	NC_015441.2	chr4	59773666	59777316
101247125	NC_015441.2	chr4	64687127	64687929
101247131	NC_015443.2	chr6	36286866	36294431
101247132	NC_015443.2	chr6	39627621	39630239
101247133	NC_015443.2	chr6	38948062	38950077
101247139	NC_015444.2	chr7	59497005	59502954
101247147	NC_015445.2	chr8	60690293	60700172
101247148	NC_015445.2	chr8	58411577	58415175
101247149	NC_015438.2	chr1	3634629	3636314
101247151	NC_015446.2	chr9	3965248	3968767
101247153	NC_015446.2	chr9	2294767	2298314
101247157	NC_015438.2	chr1	78755808	78760804
101247158	NC_015438.2	chr1	79493176	79496019
101247161	NC_015446.2	chr9	65489340	65492547
101247163	NC_015438.2	chr1	88638149	88640842
101247164	NC_015446.2	chr9	72232598	72239239
101247167	NC_015438.2	chr1	96843705	96851863
101247168	NC_015447.2	chr10	56964160	56965574
101247169	NC_015438.2	chr1	86973752	86977786
101247171	NC_015438.2	chr1	96945254	96947078
101247173	NC_015447.2	chr10	59505384	59508260
101247174	NC_015447.2	chr10	61102553	61104881
101247177	NC_015439.2	chr2	52164177	52167698
101247180	NC_015448.2	chr11	672549	675055
101247183	NC_015439.2	chr2	43049594	43051702
101247185	NC_015439.2	chr2	38188443	38191178
101247192	NC_015449.2	chr12	61486763	61490804
101247195	NC_015449.2	chr12	63191796	63194151
101247199	NC_015440.2	chr3	70395075	70395794
101247204	NC_015440.2	chr3	67158945	67160994
101247213	NC_015441.2	chr4	62086311	62089331
101247228	NC_015443.2	chr6	43758388	43768179
101247231	NC_015443.2	chr6	49600273	49606876
101247233	NC_015444.2	chr7	2882628	2893606
101247238	NC_015445.2	chr8	1246810	1249946
101247241	NC_015445.2	chr8	54629853	54642294
101247248	NC_015438.2	chr1	3612094	3615778
101247253	NC_015438.2	chr1	81046530	81047964
101247258	NC_015438.2	chr1	86548793	86561548
101247261	NC_015438.2	chr1	89616192	89618360
101247262	NC_015447.2	chr10	3091443	3092879
101247271	NC_015439.2	chr2	26905695	26915679
101247272	NC_015447.2	chr10	60364926	60366758
101247275	NC_015439.2	chr2	53958408	53963978
101247276	NC_015447.2	chr10	65133352	65134967
101247278	NC_015447.2	chr10	59816381	59817591
101247282	NC_015439.2	chr2	43983631	43989462
101247286	NC_015439.2	chr2	35732865	35737805
101247288	NC_015439.2	chr2	49945886	49947699
101247289	NC_015448.2	chr11	54599220	54603166
101247305	NC_015449.2	chr12	65567042	65568598
101247306	NC_015440.2	chr3	67448140	67452128
101247310	NC_015441.2	chr4	2431879	2434127
101247314	NC_015441.2	chr4	60897998	60900026
101247315	NC_015441.2	chr4	63274778	63277823
101247316	NC_015441.2	chr4	64135950	64146964
101247318	NC_015442.2	chr5	169430	172762
101247319	NC_015442.2	chr5	3182215	3185481
101247326	NC_015442.2	chr5	62293701	62294949
101247331	NC_015443.2	chr6	46112737	46114368
101247333	NC_015443.2	chr6	44563968	44566402
101247338	NC_015444.2	chr7	672850	676494
101247342	NC_015444.2	chr7	55217811	55218934
101247349	NC_015445.2	chr8	50792139	50794930
101247350	NC_015445.2	chr8	58127354	58137055
101247353	NC_015445.2	chr8	61812790	61815040
101247355	NC_015438.2	chr1	2219690	2226041
101247356	NC_015445.2	chr8	59331702	59333113
101247358	NC_015446.2	chr9	17884994	17890053
101247359	NC_015446.2	chr9	6770186	6773434
101247361	NC_015446.2	chr9	1021137	1026125
101247363	NC_015438.2	chr1	75717735	75722111
101247366	NC_015438.2	chr1	83404287	83410784
101247367	NC_015446.2	chr9	68019460	68022690
101247368	NC_015438.2	chr1	84747114	84748153
101247369	NC_015446.2	chr9	71458751	71460645
101247371	NC_015447.2	chr10	1211036	1214022
101247372	NC_015447.2	chr10	1132370	1134821
101247373	NC_015438.2	chr1	93118289	93119050
101247374	NC_015438.2	chr1	95778949	95781702
101247376	NC_015438.2	chr1	97994686	97996113
101247381	NC_015447.2	chr10	62812086	62813887
101247382	NC_015439.2	chr2	51230342	51235437
101247385	NC_015439.2	chr2	47743621	47744414
101247387	NC_015448.2	chr11	4818722	4822279
101247392	NC_015439.2	chr2	40232724	40233427
101247394	NC_015439.2	chr2	37285905	37291364
101247397	NC_015448.2	chr11	52677634	52678808
101247398	NC_015448.2	chr11	53499377	53504893
101247403	NC_015449.2	chr12	3408302	3408945
101247404	NC_015440.2	chr3	3336899	3355025
101247407	NC_015449.2	chr12	3091796	3092423
101247408	NC_015449.2	chr12	42552804	42555954
101247413	NC_015449.2	chr12	63325157	63337223
101247418	NC_015440.2	chr3	65938984	65945122
101247427	NC_015442.2	chr5	64110889	64120820
101247428	NC_015442.2	chr5	63581699	63583828
101247430	NC_015443.2	chr6	1445326	1449072
101247431	NC_015443.2	chr6	3575305	3576151
101247433	NC_015443.2	chr6	36294474	36297709
101247434	NC_015443.2	chr6	31375295	31379514
101247435	NC_015443.2	chr6	47378062	47382552
101247437	NC_015443.2	chr6	47652190	47653626
101247438	NC_015443.2	chr6	38728927	38733507
101247439	NC_015444.2	chr7	599173	606218
101247442	NC_015444.2	chr7	59494224	59496889
101247444	NC_015444.2	chr7	65906874	65911026
101247449	NC_015445.2	chr8	60681808	60683448
101247450	NC_015445.2	chr8	58401717	58411491
101247455	NC_015446.2	chr9	2279093	2281971
101247456	NC_015438.2	chr1	50200	54568
101247459	NC_015438.2	chr1	78773161	78784096
101247461	NC_015446.2	chr9	64793899	64794754
101247462	NC_015438.2	chr1	82177205	82183823
101247465	NC_015438.2	chr1	87740735	87747367
101247469	NC_015447.2	chr10	125513	128417
101247473	NC_015438.2	chr1	86978419	86983064
101247478	NC_015447.2	chr10	60830687	60833657
101247479	NC_015447.2	chr10	62066822	62069652
101247481	NC_015439.2	chr2	54608716	54613721
101247486	NC_015439.2	chr2	45804583	45805456
101247488	NC_015448.2	chr11	9754052	9754746
101247489	NC_015439.2	chr2	43043666	43047127
101247492	NC_015439.2	chr2	38172604	38176298
101247495	NC_015440.2	chr3	656010	658794
101247499	NC_015440.2	chr3	5152482	5153271
101247503	NC_015449.2	chr12	63183919	63186176
101247504	NC_015449.2	chr12	64351329	64354094
101247506	NC_015449.2	chr12	66317015	66319354
101247507	NC_015440.2	chr3	69465048	69471505
101247508	NC_015449.2	chr12	64860122	64865552
101247512	NC_015440.2	chr3	67148455	67153930
101247513	NC_015441.2	chr4	5817292	5826025
101247515	NC_015441.2	chr4	790971	796146
101247518	NC_015441.2	chr4	58548412	58549218
101247520	NC_015441.2	chr4	65788848	65791445
101247521	NC_015441.2	chr4	66424283	66425108
101247526	NC_015442.2	chr5	3852672	3858275
101247528	NC_015442.2	chr5	57230161	57231669
101247538	NC_015444.2	chr7	64203613	64207184
101247541	NC_015444.2	chr7	66685355	66687108
101247544	NC_015445.2	chr8	54642604	54646338
101247545	NC_015445.2	chr8	56616775	56623397
101247546	NC_015445.2	chr8	64527553	64530925
101247547	NC_015438.2	chr1	259607	260556
101247549	NC_015446.2	chr9	3488746	3491409
101247555	NC_015446.2	chr9	64265698	64266507
101247558	NC_015438.2	chr1	86384326	86398906
101247560	NC_015446.2	chr9	70386683	70387984
101247562	NC_015447.2	chr10	3071960	3078027
101247568	NC_015447.2	chr10	39234217	39238269
101247573	NC_015447.2	chr10	63760447	63763105
101247575	NC_015439.2	chr2	53114745	53118474
101247586	NC_015449.2	chr12	2350362	2354938
101247587	NC_015449.2	chr12	5577265	5577958
101247590	NC_015440.2	chr3	21789619	21791538
101247591	NC_015440.2	chr3	35371645	35374731
101247595	NC_015449.2	chr12	61937926	61945232
101247596	NC_015440.2	chr3	59400700	59406514
101247599	NC_015440.2	chr3	67524878	67529824
101247602	NW_004196730.1	-	111	2323
101247605	NC_015441.2	chr4	2427065	2430612
101247606	NC_015441.2	chr4	7089064	7090665
101247608	NC_015441.2	chr4	55117130	55119356
101247609	NC_015441.2	chr4	52221585	52223831
101247611	NC_015441.2	chr4	59777530	59782939
101247613	NC_015441.2	chr4	63279611	63283597
101247616	NC_015442.2	chr5	4421150	4421980
101247623	NC_015443.2	chr6	46082484	46087936
101247630	NC_015444.2	chr7	699861	707678
101247631	NC_015444.2	chr7	62251273	62253519
101247633	NC_015444.2	chr7	57971144	57984915
101247638	NC_015444.2	chr7	65472793	65475132
101247643	NC_015445.2	chr8	58144776	58149869
101247645	NC_015445.2	chr8	63566226	63570451
101247649	NC_015445.2	chr8	59319763	59325577
101247650	NC_015438.2	chr1	1124242	1127263
101247659	NC_015446.2	chr9	68046616	68047539
101247661	NC_015446.2	chr9	71472813	71476832
101247662	NC_015438.2	chr1	88643184	88648039
101247670	NC_015438.2	chr1	98006785	98011306
101247677	NC_015439.2	chr2	51213593	51230162
101247678	NC_015439.2	chr2	48556797	48562050
101247682	NC_015448.2	chr11	4830299	4833115
101247684	NC_015439.2	chr2	42187929	42189496
101247687	NC_015439.2	chr2	40224178	40226761
101247688	NC_015439.2	chr2	39256512	39261991
101247689	NC_015439.2	chr2	37291755	37293708
101247691	NC_015448.2	chr11	51213627	51214443
101247692	NC_015439.2	chr2	52831226	52832339
101247693	NC_015448.2	chr11	52688815	52690486
101247697	NC_015449.2	chr12	3413363	3421513
101247705	NC_015449.2	chr12	63346703	63348056
101247706	NC_015440.2	chr3	70372567	70375291
101247707	NC_015440.2	chr3	68730144	68731260
101247708	NC_015449.2	chr12	64849467	64854026
101247712	NC_015440.2	chr3	64274273	64276590
101247714	NC_015440.2	chr3	64082328	64088948
101247715	NC_015441.2	chr4	46307669	46323655
101247723	NC_015443.2	chr6	1453416	1455689
101247724	NC_015443.2	chr6	3576897	3578741
101247726	NC_015443.2	chr6	47373526	47377750
101247729	NC_015443.2	chr6	38720272	38721101
101247731	NC_015444.2	chr7	4557741	4564186
101247734	NC_015444.2	chr7	67390037	67393184
101247735	NC_015444.2	chr7	65900779	65903607
101247739	NC_015445.2	chr8	65444774	65450220
101247746	NC_015446.2	chr9	2269079	2276411
101247747	NC_015446.2	chr9	1301161	1302458
101247750	NC_015438.2	chr1	78784261	78785141
101247751	NC_015438.2	chr1	79791700	79804369
101247754	NC_015446.2	chr9	69488566	69490555
101247757	NC_015438.2	chr1	90455488	90458537
101247758	NC_015438.2	chr1	91410892	91413206
101247762	NC_015447.2	chr10	56817309	56821448
101247764	NC_015447.2	chr10	41567912	41570014
101247770	NC_015447.2	chr10	62070868	62073301
101247771	NC_015439.2	chr2	54605659	54608619
101247772	NC_015447.2	chr10	65236898	65240084
101247776	NC_015448.2	chr11	704821	709426
101247777	NC_015439.2	chr2	45801921	45803861
101247783	NC_015439.2	chr2	38166301	38172448
101247784	NC_015439.2	chr2	35728695	35731430
101247789	NC_015440.2	chr3	712121	717115
101247791	NC_015449.2	chr12	4542166	4544480
101247793	NC_015449.2	chr12	12862993	12872547
101247803	NC_015440.2	chr3	63378298	63384011
101247804	NC_015440.2	chr3	62566639	62569310
101247808	NC_015441.2	chr4	742847	747705
101247809	NC_015441.2	chr4	417325	419360
101247812	NC_015441.2	chr4	55099429	55100428
101247816	NC_015441.2	chr4	65796380	65797323
101247818	NC_015441.2	chr4	65160907	65162714
101247821	NC_015442.2	chr5	5736190	5745530
101247822	NC_015442.2	chr5	7090565	7096097
101247825	NC_015443.2	chr6	2517332	2519523
101247828	NC_015443.2	chr6	31260223	31262826
101247829	NC_015443.2	chr6	34396773	34402553
101247830	NC_015443.2	chr6	41894750	41898274
101247831	NC_015443.2	chr6	40003585	40009336
101247834	NC_015443.2	chr6	48846690	48849081
101247838	NC_015444.2	chr7	64167075	64170725
101247841	NC_015445.2	chr8	1257676	1258589
101247843	NC_015445.2	chr8	56633065	56639740
101247851	NC_015438.2	chr1	64034524	64039294
101247859	NC_015438.2	chr1	86662480	86666079
101247864	NC_015438.2	chr1	92391146	92397637
101247867	NC_015438.2	chr1	94995737	94996656
101247871	NC_015439.2	chr2	27070469	27082694
101247875	NC_015439.2	chr2	53110711	53113844
101247878	NC_015439.2	chr2	49576090	49577179
101247880	NC_015439.2	chr2	46727831	46730494
101247886	NC_015448.2	chr11	55584129	55612769
101247887	NC_015439.2	chr2	38565052	38582722
101247888	NC_015449.2	chr12	474446	477536
101247889	NC_015449.2	chr12	2359677	2360294
101247891	NC_015440.2	chr3	8858617	8860905
101247900	NC_015440.2	chr3	67629749	67634727
101247902	NW_004194573.1	-	447	2726
101247903	NC_015440.2	chr3	61600070	61602598
101247904	NC_015441.2	chr4	4461536	4467426
101247905	NC_015441.2	chr4	7044899	7049688
101247909	NC_015441.2	chr4	60942538	60943493
101247912	NC_015441.2	chr4	64927930	64931823
101247913	NC_015441.2	chr4	61415164	61419177
101247915	NC_015442.2	chr5	4426151	4429878
101247918	NC_015442.2	chr5	65602565	65608958
101247919	NC_015442.2	chr5	64932455	64935637
101247922	NC_015442.2	chr5	60671267	60674207
101247925	NC_015443.2	chr6	35947161	35950059
101247927	NC_015443.2	chr6	45280291	45285672
101247929	NC_015443.2	chr6	42721765	42725248
101247932	NC_015444.2	chr7	747116	750810
101247936	NC_015444.2	chr7	55184595	55185754
101247945	NC_015445.2	chr8	50907086	50909083
101247949	NC_015445.2	chr8	62692162	62693560
101247951	NC_015438.2	chr1	6317513	6322819
101247952	NC_015445.2	chr8	59311530	59313296
101247954	NC_015446.2	chr9	6273243	6276626
101247957	NC_015438.2	chr1	82229460	82240522
101247958	NC_015446.2	chr9	65319769	65332768
101247961	NC_015446.2	chr9	71478707	71481662
101247963	NC_015447.2	chr10	1067275	1069824
101247964	NC_015438.2	chr1	93526822	93530090
101247965	NC_015438.2	chr1	95804715	95810621
101247969	NC_015447.2	chr10	50962825	50971189
101247970	NC_015447.2	chr10	56015466	56027153
101247975	NC_015439.2	chr2	51200836	51208495
101247977	NC_015448.2	chr11	3704387	3706648
101247978	NC_015439.2	chr2	45008546	45010086
101247979	NC_015439.2	chr2	42169702	42171515
101247980	NC_015439.2	chr2	41833264	41835953
101247988	NC_015440.2	chr3	5449849	5458824
101247992	NC_015440.2	chr3	52316433	52317261
101247996	NC_015449.2	chr12	63371341	63373284
101247997	NC_015440.2	chr3	70368342	70369028
101247998	NC_015449.2	chr12	66313311	66316597
101248001	NC_015440.2	chr3	66109024	66115266
101248003	NC_015440.2	chr3	65461958	65465470
101248005	NC_015440.2	chr3	64051873	64055922
101248007	NC_015441.2	chr4	54536810	54541065
101248009	NC_015442.2	chr5	2319478	2322435
101248012	NC_015442.2	chr5	63511678	63513271
101248019	NC_015443.2	chr6	38658785	38661956
101248027	NC_015445.2	chr8	2291715	2294148
101248030	NC_015445.2	chr8	65430498	65433800
101248035	NC_015446.2	chr9	4306430	4314687
101248037	NC_015446.2	chr9	1295422	1296707
101248040	NC_015446.2	chr9	5092980	5097129
101248048	NC_015446.2	chr9	69484219	69487906
101248052	NC_015438.2	chr1	91405655	91410755
101248054	NC_015438.2	chr1	87002912	87005210
101248055	NC_015438.2	chr1	97050235	97054016
101248057	NC_015447.2	chr10	59560603	59565387
101248058	NC_015447.2	chr10	61203710	61206061
101248061	NC_015439.2	chr2	54600328	54605121
101248062	NC_015447.2	chr10	65035659	65042878
101248067	NC_015439.2	chr2	45796284	45797276
101248077	NC_015440.2	chr3	759487	763660
101248079	NC_015449.2	chr12	4544699	4547551
101248083	NC_015440.2	chr3	53759020	53761991
101248084	NC_015449.2	chr12	63137980	63139866
101248086	NC_015449.2	chr12	66989707	66994084
101248087	NC_015449.2	chr12	65547863	65549483
101248091	NC_015441.2	chr4	5728570	5731317
101248092	NC_015441.2	chr4	2420653	2423574
101248095	NC_015441.2	chr4	3012889	3016617
101248097	NC_015441.2	chr4	62148593	62150469
101248098	NC_015441.2	chr4	65798846	65800919
101248100	NC_015441.2	chr4	65170840	65172759
101248101	NC_015442.2	chr5	179202	184048
101248102	NC_015442.2	chr5	1210931	1213875
101248108	NC_015443.2	chr6	24018786	24021962
101248112	NC_015443.2	chr6	41884447	41886615
101248113	NC_015443.2	chr6	40880493	40883240
101248116	NC_015443.2	chr6	49583991	49585105
101248117	NC_015443.2	chr6	48842082	48843652
101248120	NC_015444.2	chr7	63221340	63226233
101248122	NC_015445.2	chr8	1258619	1264947
101248124	NC_015445.2	chr8	56642581	56643613
101248125	NC_015445.2	chr8	64512995	64514125
101248126	NC_015438.2	chr1	2211932	2218930
101248129	NC_015446.2	chr9	3455728	3458161
101248133	NC_015438.2	chr1	81075950	81076805
101248135	NC_015438.2	chr1	79977951	79979356
101248137	NC_015438.2	chr1	83424931	83425929
101248138	NC_015446.2	chr9	69112441	69113777
101248142	NC_015438.2	chr1	88648406	88651146
101248143	NC_015438.2	chr1	89644631	89656412
101248146	NC_015438.2	chr1	93026344	93030841
101248148	NC_015438.2	chr1	95002452	95006372
101248154	NC_015447.2	chr10	64525792	64529578
101248158	NC_015439.2	chr2	49559138	49565424
101248165	NC_015448.2	chr11	32951205	32955136
101248170	NC_015448.2	chr11	55614045	55618327
101248180	NC_015440.2	chr3	60321883	60332377
101248183	NC_015440.2	chr3	68069230	68073053
101248184	NC_015440.2	chr3	66924084	66930746
101248187	NC_015441.2	chr4	6942291	6944084
101248189	NC_015441.2	chr4	51904793	51919041
101248191	NC_015441.2	chr4	60947236	60969075
101248192	NC_015441.2	chr4	63308608	63312842
101248194	NC_015441.2	chr4	64925397	64926589
101248196	NC_015442.2	chr5	3216195	3220495
101248197	NC_015442.2	chr5	348846	351334
101248199	NC_015442.2	chr5	65599194	65602379
101248202	NC_015442.2	chr5	62268020	62269632
101248203	NC_015442.2	chr5	60667194	60674842
101248207	NC_015443.2	chr6	46075785	46079706
101248208	NC_015443.2	chr6	45272108	45273511
101248210	NC_015443.2	chr6	42557786	42561731
101248212	NC_015443.2	chr6	48230930	48234953
101248214	NC_015444.2	chr7	751885	755095
101248217	NC_015444.2	chr7	57907565	57920729
101248218	NC_015444.2	chr7	55150444	55163509
101248220	NC_015444.2	chr7	64990769	64994927
101248223	NC_015445.2	chr8	50960219	50961902
101248227	NC_015445.2	chr8	61788843	61790763
101248228	NC_015445.2	chr8	59765969	59780494
101248232	NC_015438.2	chr1	1663681	1668770
101248236	NC_015446.2	chr9	65312328	65314158
101248242	NC_015438.2	chr1	93789105	93789814
101248243	NC_015438.2	chr1	95812701	95819916
101248245	NC_015438.2	chr1	96735469	96741297
101248251	NC_015447.2	chr10	60377030	60379593
101248253	NC_015439.2	chr2	52066901	52069346
101248254	NC_015439.2	chr2	51199074	51200095
101248255	NC_015439.2	chr2	48552060	48555087
101248258	NC_015448.2	chr11	3735746	3740703
101248261	NC_015439.2	chr2	42161654	42163607
101248263	NC_015439.2	chr2	41719263	41723951
101248266	NC_015439.2	chr2	35718256	35728527
101248267	NC_015448.2	chr11	51221928	51228680
101248276	NC_015440.2	chr3	52314445	52314960
101248277	NC_015440.2	chr3	56148796	56151795
101248280	NC_015449.2	chr12	66290955	66297799
101248281	NC_015440.2	chr3	69446944	69451773
101248282	NC_015440.2	chr3	68698330	68702554
101248283	NC_015449.2	chr12	64841073	64841868
101248289	NC_015440.2	chr3	64026921	64032990
101248292	NC_015441.2	chr4	54517398	54536825
101248294	NC_015442.2	chr5	2340322	2342448
101248296	NC_015442.2	chr5	11600600	11601640
101248299	NC_015442.2	chr5	45064294	45084303
101248300	NC_015442.2	chr5	64102847	64108815
101248301	NC_015442.2	chr5	63498354	63499764
101248307	NC_015443.2	chr6	43707413	43719095
101248310	NC_015444.2	chr7	1778432	1782000
101248316	NC_015444.2	chr7	67368428	67373316
101248324	NC_015446.2	chr9	4509140	4514596
101248325	NC_015446.2	chr9	1272667	1275295
101248327	NC_015446.2	chr9	5012228	5015714
101248331	NC_015446.2	chr9	69490873	69495597
101248333	NC_015446.2	chr9	72072446	72077015
101248343	NC_015447.2	chr10	61368920	61373768
101248346	NC_015439.2	chr2	54573469	54581913
101248348	NC_015447.2	chr10	63748839	63757426
101248350	NC_015439.2	chr2	46713381	46716657
101248356	NC_015448.2	chr11	53564262	53568184
101248357	NC_015439.2	chr2	45790336	45796223
101248361	NC_015440.2	chr3	764568	768362
101248372	NC_015449.2	chr12	65539027	65542935
101248375	NC_015440.2	chr3	66980619	66986842
101248377	NC_015441.2	chr4	2416201	2420320
101248380	NC_015441.2	chr4	18239461	18288041
101248382	NC_015441.2	chr4	58630481	58637378
101248383	NC_015441.2	chr4	62304264	62312763
101248400	NC_015443.2	chr6	41879556	41882899
101248401	NC_015443.2	chr6	39856496	39862536
101248403	NC_015443.2	chr6	49563972	49566357
101248404	NC_015443.2	chr6	48844617	48846661
101248409	NC_015444.2	chr7	66667149	66672026
101248410	NC_015445.2	chr8	56712473	56724993
101248416	NC_015438.2	chr1	3541825	3542992
101248420	NC_015446.2	chr9	64437366	64447235
101248422	NC_015438.2	chr1	83437747	83441319
101248424	NC_015438.2	chr1	86258405	86266709
101248425	NC_015438.2	chr1	88641020	88641845
101248427	NC_015447.2	chr10	3040310	3046311
101248428	NC_015447.2	chr10	2080311	2083863
101248432	NC_015438.2	chr1	95008380	95010261
101248433	NC_015438.2	chr1	83774729	83775533
101248438	NC_015447.2	chr10	63827085	63831983
101248439	NC_015447.2	chr10	64396161	64397426
101248441	NC_015447.2	chr10	59988990	59990681
101248442	NC_015439.2	chr2	50410821	50414473
101248443	NC_015439.2	chr2	49545422	49550195
101248444	NC_015448.2	chr11	1647698	1649817
101248447	NC_015448.2	chr11	1721008	1722400
101248448	NC_015448.2	chr11	32790557	32792733
101248449	NC_015439.2	chr2	37242166	37243722
101248450	NC_015448.2	chr11	52712569	52718614
101248453	NC_015448.2	chr11	55621858	55627030
101248455	NC_015449.2	chr12	490501	498996
101248456	NC_015449.2	chr12	2364431	2364963
101248457	NC_015440.2	chr3	3314239	3320429
101248465	NC_015440.2	chr3	60350952	60355373
101248467	NC_015440.2	chr3	67863182	67868271
101248468	NC_015440.2	chr3	66911139	66918676
101248469	NC_015440.2	chr3	65882991	65885142
101248472	NC_015441.2	chr4	4451578	4460846
101248477	NC_015441.2	chr4	60972570	60976576
101248478	NC_015441.2	chr4	63314546	63317695
101248479	NC_015441.2	chr4	64204942	64206078
101248480	NC_015441.2	chr4	64920884	64922984
101248482	NC_015442.2	chr5	3185958	3192366
101248483	NC_015442.2	chr5	371506	372361
101248484	NC_015442.2	chr5	64922941	64927222
101248486	NC_015442.2	chr5	60661751	60665843
101248489	NC_015443.2	chr6	46094378	46095501
101248491	NC_015443.2	chr6	44509046	44509808
101248492	NC_015443.2	chr6	42694073	42697495
101248495	NC_015444.2	chr7	764131	775873
101248502	NC_015445.2	chr8	3493856	3497755
101248507	NC_015445.2	chr8	62664647	62670236
101248509	NC_015445.2	chr8	59738091	59739486
101248513	NC_015446.2	chr9	701670	706012
101248514	NC_015446.2	chr9	54385373	54387329
101248517	NC_015438.2	chr1	84798847	84813067
101248520	NC_015447.2	chr10	1172045	1172684
101248522	NC_015438.2	chr1	95822841	95824162
101248523	NC_015447.2	chr10	6200597	6203503
101248527	NC_015438.2	chr1	90730766	90733959
101248528	NC_015447.2	chr10	27676702	27679587
101248529	NC_015447.2	chr10	60373913	60375479
101248531	NC_015447.2	chr10	62858905	62866540
101248532	NC_015439.2	chr2	52061969	52065555
101248533	NC_015439.2	chr2	51184797	51195774
101248535	NC_015439.2	chr2	47696616	47698425
101248539	NC_015439.2	chr2	42140991	42145446
101248541	NC_015448.2	chr11	19905215	19909806
101248542	NC_015439.2	chr2	39224645	39228579
101248545	NC_015439.2	chr2	33985445	33986870
101248551	NC_015449.2	chr12	42383686	42387442
101248553	NC_015440.2	chr3	52286542	52287206
101248554	NC_015440.2	chr3	53652412	53653172
101248556	NC_015440.2	chr3	56151843	56155502
101248557	NC_015449.2	chr12	63440893	63443257
101248559	NC_015449.2	chr12	66286744	66289185
101248560	NC_015440.2	chr3	69445014	69446629
101248563	NC_015440.2	chr3	66074205	66081604
101248571	NC_015441.2	chr4	55045978	55050494
101248572	NC_015441.2	chr4	54500532	54501184
101248573	NC_015442.2	chr5	2345252	2346163
101248574	NC_015442.2	chr5	5767932	5771267
101248575	NC_015442.2	chr5	7120455	7124108
101248576	NC_015442.2	chr5	11598017	11600541
101248577	NC_015442.2	chr5	7076063	7077691
101248578	NC_015442.2	chr5	43986238	43996645
101248580	NC_015442.2	chr5	63474143	63475514
101248589	NC_015444.2	chr7	660977	666056
101248594	NC_015444.2	chr7	67364436	67368090
101248607	NC_015446.2	chr9	1244206	1249426
101248608	NC_015446.2	chr9	406336	420984
101248610	NC_015438.2	chr1	76580139	76604402
101248615	NC_015438.2	chr1	86677083	86679741
101248625	NC_015438.2	chr1	97149770	97153159
101248631	NC_015439.2	chr2	54561221	54564576
101248633	NC_015439.2	chr2	53916106	53919479
101248636	NC_015439.2	chr2	46706460	46707696
101248641	NC_015448.2	chr11	53557771	53564307
101248642	NC_015439.2	chr2	45741996	45743963
101248645	NC_015449.2	chr12	1512655	1514431
101248646	NC_015440.2	chr3	771544	775320
101248649	NC_015440.2	chr3	10220245	10220795
101248655	NC_015449.2	chr12	63125273	63127100
101248665	NC_015441.2	chr4	405056	406896
101248666	NC_015441.2	chr4	2827322	2834459
101248670	NC_015441.2	chr4	62300580	62304002
101248673	NC_015442.2	chr5	208674	209956
101248677	NC_015442.2	chr5	65586008	65592289
101248685	NC_015443.2	chr6	34496192	34497439
101248686	NC_015443.2	chr6	41874530	41876033
101248688	NC_015443.2	chr6	49545306	49549270
101248692	NC_015444.2	chr7	64137158	64139538
101248693	NC_015444.2	chr7	63182229	63186846
101248695	NC_015444.2	chr7	66672055	66674077
101248696	NC_015445.2	chr8	424180	430674
101248698	NC_015445.2	chr8	65425195	65430178
101248699	NC_015438.2	chr1	6230893	6239272
101248700	NC_015445.2	chr8	58366937	58368779
101248710	NC_015446.2	chr9	64480111	64481480
101248715	NC_015438.2	chr1	85997246	86006481
101248717	NC_015438.2	chr1	89659079	89660293
101248722	NC_015447.2	chr10	779572	782942
101248724	NC_015438.2	chr1	95012649	95013466
101248726	NC_015438.2	chr1	83793971	83797380
101248727	NC_015447.2	chr10	48118855	48119491
101248731	NC_015447.2	chr10	63834577	63837087
101248732	NC_015447.2	chr10	65275605	65280100
101248733	NC_015439.2	chr2	53071257	53074883
101248738	NC_015439.2	chr2	41703164	41706658
101248739	NC_015439.2	chr2	40199042	40213871
101248743	NC_015448.2	chr11	52718626	52720598
101248746	NC_015439.2	chr2	38494947	38497704
101248748	NC_015440.2	chr3	3291611	3314604
101248755	NC_015440.2	chr3	59327270	59335891
[truncated: 8,921 more rows]
