# Supplementary material for: LncRNA expression profile and ceRNA analysis in tomato during flowering
Source: PLoS One. 2019 Jan 17;14(1):e0210650. doi: 10.1371/journal.pone.0210650 (PMC6336255; doi:10.1371/journal.pone.0210650)
Supplement: S6 Table — (XLSX) [file pone.0210650.s008.xlsx]

## Sheet: S5 Table
S5 Table：LncRNA cis target gene
chr	LncRNA	LncRNA_Strand	mRNA	mRNA_Strand	RelationShip	Cor
NC_015440.2	101245338	+	101244755	-	Downstream:218	-0.63617
NC_015447.2	101243934	-	101246766	+	Downstream:746	0.779508
NC_015445.2	101248222	+	101247941	+	Upstream:5031	0.825589
NC_015440.2	101249623	+	101244272	+	Downstream:1606	-0.686774
NC_015444.2	101253914	+	101254218	-	Downstream:878	0.687075
NC_015440.2	101254165	+	101254454	-	overlap	0.762796
NC_015440.2	101255182	+	101254885	+	Downstream:4915	0.660568
NC_015439.2	101255360	-	101255058	-	Downstream:1681	0.622609
NC_015440.2	101256263	-	101255968	+	Downstream:12265	0.655282
NC_015448.2	101252646	-	101257922	-	Upstream:858	0.95441
NC_015446.2	101258184	+	101257403	+	Upstream:1385	0.746456
NC_015440.2	101258844	+	101258545	+	Downstream:3614	0.753686
NC_015444.2	101259554	+	101259264	-	Upstream:11354	0.668592
NC_015443.2	101260141	-	101259844	+	Upstream:69	0.774187
NC_015446.2	101259883	-	101260176	+	Upstream:122	0.731657
NC_015438.2	101256038	-	101261669	-	Downstream:599	0.72658
NC_015448.2	101261186	+	101261682	+	Downstream:3420	0.878367
NC_015448.2	101261882	-	101261389	+	Upstream:581	0.614949
NC_015439.2	101261683	+	101262167	+	overlap	0.966982
NC_015445.2	101262541	-	101257195	+	Upstream:1091	0.976194
NC_015446.2	101262949	-	101262648	-	Downstream:18316	0.873589
NC_015440.2	101265909	-	101265629	+	Downstream:2920	0.921677
NC_015438.2	101266166	+	101245898	-	overlap	-0.739418
NC_015447.2	101261183	-	101266280	+	Upstream:12474	0.62719
NC_015446.2	101266551	-	101262554	-	Downstream:3668	-0.693158
NC_015438.2	101266071	-	101266976	+	Downstream:12675	0.710005
NC_015441.2	101267806	-	101256872	+	Upstream:107	0.736898
NC_015439.2	101250759	-	101267864	+	overlap	0.781198
NC_015440.2	101254165	+	101268648	-	Downstream:831	0.696873
NC_015449.2	101266010	-	101268751	-	Upstream:765	0.709341
NC_015439.2	101268838	-	101252448	+	Upstream:190	0.773223
NC_015438.2	104644371	-	101245401	-	Upstream:1562	0.902941
NC_015448.2	104644476	-	101251053	-	Upstream:66345	-0.700593
NC_015448.2	104644758	-	101251846	+	overlap	0.843796
NC_015449.2	104644821	+	101244159	-	Downstream:394	0.688184
NC_015438.2	104645416	-	101266767	+	overlap	0.779587
NC_015439.2	104645520	+	101252936	+	Downstream:27256	0.631767
NC_015439.2	104645666	+	100736507	+	Upstream:369	-0.617276
NC_015439.2	104645666	+	101254148	-	overlap	-0.742034
NC_015439.2	104645672	+	101258713	+	Upstream:3265	0.85905
NC_015439.2	104645696	-	101258808	+	Upstream:357	0.842038
NC_015439.2	104645705	-	101249976	-	Downstream:1169	-0.654054
NC_015439.2	104645792	+	101246305	-	Upstream:1550	0.727228
NC_015440.2	104646378	-	101249249	+	Upstream:14310	0.633831
NC_015440.2	104646568	+	101267596	-	Downstream:107	0.659357
NC_015441.2	104646943	-	101256278	+	Downstream:22059	0.740554
NC_015441.2	104647158	+	101260131	-	Downstream:105	-0.853355
NC_015442.2	104647297	-	101244664	-	Downstream:11708	0.725928
NC_015442.2	101255591	+	104647481	+	Upstream:2412	0.769642
NC_015443.2	101254211	+	104648025	+	Upstream:4896	0.888493
NC_015443.2	101268480	-	104648119	+	Downstream:8756	0.897391
NC_015444.2	104648200	-	101266736	-	Upstream:8808	0.62029
NC_015444.2	104648430	-	100191117	-	Downstream:2728	0.874837
NC_015444.2	104648445	+	101257282	-	Upstream:28772	0.694189
NC_015444.2	104648572	+	101252007	+	Downstream:1610	0.872265
NC_015438.2	104648931	-	101248726	+	overlap	-0.803242
NC_015445.2	104648954	-	101245086	-	Downstream:390	0.741613
NC_015445.2	104648984	+	101260962	-	Downstream:3134	0.840596
NC_015446.2	104649403	-	101244614	+	Downstream:1536	0.854463
NC_015447.2	104649458	-	101246383	-	Upstream:1292	0.809598
NC_015447.2	104649521	-	101256720	-	Upstream:96777	0.604019
NC_015447.2	104649636	+	104649737	+	Upstream:2744	0.8164
NC_015445.2	104795608	+	101262137	+	Upstream:1047	0.996841
NC_015438.2	104648913	-	109119987	-	Downstream:1253	0.788596
NC_015441.2	109120158	+	101246051	-	overlap	0.617526
NC_015444.2	109120783	-	100191117	-	Downstream:1443	0.844893
NC_015445.2	109120957	-	101264350	-	Intron	0.664919
NC_015446.2	101250052	-	109121167	-	Downstream:756	0.746127
NC_015447.2	109121214	-	101257912	+	Downstream:2768	0.774858
NC_015447.2	109121214	-	101259694	+	overlap	0.729897
NC_015447.2	109121366	-	101249309	-	overlap	0.977428
NC_015447.2	109121366	-	101267356	-	Upstream:1807	0.888689
NW_004194386.1	104645248	-	543623	+	overlap	-0.624646
NW_004194386.1	109119254	-	543623	+	overlap	-0.643952
NC_015448.2	101255956	+	543652	+	Downstream:2509	0.623147
NC_015446.2	104649077	-	543907	+	Downstream:4774	-0.837447
NC_015441.2	104646665	+	544091	+	Downstream:4860	0.65746
NC_015439.2	104645701	+	778253	-	Downstream:7635	0.805164
NC_015439.2	104645702	+	778253	-	overlap	0.802342
NC_015439.2	XLOC_009699	+	101255859	+	Downstream:20446	0.664223
NC_015442.2	XLOC_029232	+	101250803	+	overlap	0.986313
NC_015443.2	XLOC_036192	-	101248982	+	Upstream:5351	0.745114
NC_015444.2	XLOC_041098	+	101259352	-	Downstream:0	0.788086
NC_015445.2	XLOC_048112	-	101250533	-	Downstream:5116	0.947777
NC_015446.2	XLOC_052251	+	101244113	-	overlap	0.940306
NC_015446.2	XLOC_054113	-	101247164	+	Upstream:1650	-0.709344
NC_015447.2	XLOC_057877	+	101245207	+	Downstream:7725	0.823181
NC_015447.2	XLOC_057877	+	101245501	-	Intron	0.97734
NC_015448.2	XLOC_064870	-	101249782	+	overlap	0.998303
NC_015448.2	XLOC_064870	-	104644447	-	Downstream:10742	0.980823
NC_015449.2	XLOC_070117	-	101055500	+	Upstream:373	0.702688
NC_015448.2	101244448	-	101243954	+	Upstream:6629	0.79216
NC_015447.2	101244332	+	101244630	-	Downstream:708	0.888266
NC_015440.2	101246035	-	101246328	-	Upstream:217	0.908107
NC_015443.2	101246535	+	101246828	-	Downstream:5638	0.954145
NC_015443.2	101247729	-	101247438	+	Downstream:7826	0.868903
NC_015438.2	101248243	-	101247965	-	Upstream:2080	0.719421
NC_015448.2	101248349	+	101248635	+	Downstream:8847	0.668125
NC_015444.2	101250231	-	101249935	-	Downstream:1479	0.800335
NC_015441.2	101250884	+	101250595	+	Downstream:3232	0.850039
NC_015441.2	100191124	-	101251672	+	Downstream:1469	0.600711
NC_015440.2	101252570	-	101253071	-	Upstream:2643	0.651311
NC_015440.2	101245340	+	101253678	-	Downstream:390	-0.625779
NC_015443.2	101254602	-	101255414	+	Upstream:4961	0.648207
NC_015448.2	101255762	+	101255463	-	Downstream:55	0.785994
NC_015438.2	101255539	+	101255836	+	Downstream:5440	0.956463
NC_015438.2	101246555	-	101257103	-	Upstream:6560	1
NC_015440.2	101257250	+	101256958	-	Downstream:15378	0.807164
NC_015438.2	101256430	+	101257815	-	Downstream:45	0.812135
NC_015438.2	101252444	+	101258306	+	Upstream:12702	0.782737
NC_015438.2	101258309	-	101258601	-	Downstream:1294	0.697649
NC_015449.2	101258337	+	101258829	+	Downstream:169	0.723944
NC_015441.2	101260041	-	101259145	+	Downstream:8075	0.810983
NC_015448.2	101260686	+	101260789	+	overlap	0.713934
NC_015440.2	101260808	+	101250203	-	Upstream:3881	0.831931
NC_015439.2	101261195	+	101249978	+	Downstream:911	0.803827
NC_015444.2	101260738	-	101261244	-	Downstream:1124	-0.698644
NC_015441.2	101245352	-	101261614	-	Downstream:7742	0.770488
NC_015442.2	101261920	-	101261330	-	Upstream:6843	-0.67175
NC_015438.2	101262156	-	101261862	-	Upstream:275	-0.626096
NC_015438.2	101262462	-	101260672	-	Upstream:1186	0.641986
NC_015439.2	101261768	-	101262675	-	Upstream:4503	0.630102
NC_015448.2	101262582	-	101262884	-	Downstream:16918	0.610567
NC_015445.2	101262835	-	101263135	+	Downstream:729	0.819533
NC_015440.2	101263689	+	101251075	+	Downstream:1336	0.74652
NC_015446.2	101266155	+	101266449	+	Downstream:21619	0.955328
NC_015447.2	101266768	+	101266462	-	Downstream:10457	1
NC_015449.2	101266010	-	101267880	+	Downstream:616	0.702298
NC_015438.2	101268026	+	101267737	-	Downstream:276	-0.609539
NC_015438.2	101244325	+	101268146	+	Upstream:381	0.660068
NC_015439.2	101268828	+	101268539	-	Downstream:5693	0.68981
NC_015442.2	102464320	-	100750255	-	Upstream:8141	0.620918
NC_015447.2	104644388	-	101258117	+	overlap	0.874021
NC_015447.2	104644388	-	101258425	+	overlap	0.795095
NC_015447.2	104644388	-	101268240	+	overlap	0.881092
NC_015448.2	104644718	-	101254968	-	Downstream:80637	0.743667
NC_015449.2	104644822	+	101250189	+	Downstream:2628	0.826617
NC_015449.2	104644822	+	101256656	-	Upstream:1699	0.932734
NC_015449.2	104644832	-	101253863	+	Downstream:3759	0.606235
NC_015449.2	104644938	-	101244843	+	Upstream:1188	-0.625198
NC_015439.2	104645700	+	101245415	-	Downstream:5901	0.916974
NC_015439.2	104645700	+	101246004	-	overlap	0.953046
NC_015439.2	104645715	-	101265497	-	Downstream:1889	-0.619396
NC_015439.2	104645720	-	101255848	+	Upstream:2110	0.679728
NC_015439.2	104645778	+	101258812	+	Downstream:16441	0.811337
NC_015439.2	104645822	-	101243862	+	overlap	-0.601665
NC_015440.2	104646225	-	101252467	+	Upstream:3114	0.776179
NC_015440.2	104646357	-	101267496	-	Downstream:3449	0.952383
NC_015440.2	104646381	-	101254880	+	Downstream:1405	0.651709
NC_015440.2	101266006	+	104646505	+	Upstream:4360	0.969654
NC_015440.2	101243974	+	104646570	-	Downstream:574	0.835721
NC_015438.2	104646653	-	101267838	+	Upstream:22818	0.805013
NC_015441.2	104647143	+	104647144	+	Downstream:12421	0.629126
NC_015442.2	104647383	+	101267525	-	Downstream:16199	0.756699
NC_015442.2	104647558	-	101266518	-	Upstream:1185	0.980182
NC_015442.2	104647643	+	101250994	-	overlap	0.730071
NC_015443.2	101253290	-	104647798	+	Upstream:5996	-0.609173
NC_015445.2	104648823	-	104648824	+	overlap	0.929331
NC_015446.2	104649067	+	101267153	-	Downstream:5432	0.74816
NC_015447.2	104649633	-	101266373	+	Upstream:19333	-0.619298
NC_015445.2	104795599	+	101262743	+	Upstream:2367	0.612016
NC_015438.2	109118979	+	101266672	+	Downstream:758	0.878685
NC_015438.2	109119111	+	101250452	+	Upstream:2964	0.613366
NC_015449.2	109119178	+	104644889	+	Upstream:411	0.935088
NC_015449.2	109119185	-	101255478	-	Upstream:4	0.752598
NC_015440.2	109119798	-	101250585	-	Downstream:1028	0.783818
NC_015440.2	109119838	+	109119837	-	Upstream:188	0.851511
NC_015440.2	109119879	-	101266110	-	Downstream:3195	0.611276
NC_015438.2	104646590	-	109119908	-	Downstream:96401	0.688343
NC_015443.2	109120547	+	101264728	+	Upstream:82	0.788753
NC_015444.2	109120728	+	101257488	+	Downstream:826	0.747919
NC_015445.2	109120923	+	101254318	-	Intron	-0.794264
NC_015446.2	109121125	-	101265478	+	Upstream:8049	0.724838
NC_015438.2	101251336	+	543627	-	Upstream:1222	0.828547
NC_015446.2	104649071	-	543713	+	Upstream:408	0.660241
NC_015443.2	102464330	-	543816	-	Upstream:10467	0.674403
NC_015443.2	104648043	+	543816	-	Upstream:3052	0.904207
NC_015448.2	101266581	+	543829	+	Downstream:10128	-0.772206
NC_015438.2	104645388	-	543892	-	Downstream:1706	0.963768
NC_015438.2	778261	+	101251624	-	Downstream:366	0.673119
NC_015444.2	101264446	+	778285	+	Downstream:1554	0.691485
NC_015438.2	XLOC_003142	-	101258491	+	Intron	0.951477
NC_015438.2	XLOC_003142	-	101258786	-	Downstream:5931	0.845113
NC_015438.2	XLOC_003677	-	101266767	+	overlap	0.689614
NC_015439.2	XLOC_010355	+	101243845	-	Downstream:6044	0.961172
NC_015439.2	XLOC_010355	+	101244141	-	overlap	0.766961
NC_015439.2	XLOC_010355	+	101244438	-	overlap	0.870237
NC_015439.2	XLOC_011775	-	101258812	+	Downstream:35957	0.767933
NC_015440.2	XLOC_018455	-	101259731	+	overlap	-0.660029
NC_015441.2	XLOC_024451	-	101244180	+	Upstream:425	0.752981
NC_015442.2	XLOC_029279	+	101247622	-	Downstream:1306	-0.674105
NC_015443.2	XLOC_034775	+	101257971	-	Downstream:880	0.879071
NC_015443.2	XLOC_035796	-	101256289	-	overlap	0.807919
NC_015444.2	XLOC_041593	-	101244092	-	Downstream:3682	0.807718
NC_015446.2	XLOC_051815	+	101254025	-	Downstream:1676	0.810141
NC_015446.2	XLOC_052457	+	101264668	-	overlap	0.772881
NC_015446.2	XLOC_053171	-	101247549	-	Downstream:1372	0.872676
NC_015447.2	XLOC_057914	+	101258788	-	overlap	0.964685
NC_015447.2	XLOC_058634	+	104644378	-	overlap	0.78346
NC_015447.2	XLOC_058885	-	101266074	+	overlap	-0.652498
NC_015447.2	XLOC_059051	-	101249868	-	Downstream:2838	0.827154
NC_015447.2	XLOC_059051	-	101250168	-	Upstream:10398	0.840378
NC_015447.2	XLOC_059051	-	543844	+	overlap	0.988199
NC_015447.2	XLOC_059638	-	101248343	+	Upstream:2	0.723173
NC_015448.2	XLOC_064872	-	101249782	+	Intron	0.999076
NC_015448.2	XLOC_064872	-	104644447	-	Downstream:1714	0.978375
NC_015448.2	XLOC_065416	-	101246499	+	Downstream:87034	0.74426
NC_015448.2	XLOC_065690	-	104644809	-	overlap	0.661018
NC_015449.2	XLOC_070043	-	101264404	+	Upstream:158	0.758132
NC_015443.2	101243713	-	101244000	-	Downstream:19346	0.763563
NC_015447.2	101245501	-	101245207	+	Downstream:4960	0.816186
NC_015440.2	101244929	-	101246316	+	Downstream:2672	0.916117
NC_015449.2	101246404	+	101246693	+	Downstream:9582	0.676628
NC_015439.2	101248069	-	101247780	-	Downstream:3688	0.774607
NC_015439.2	101250646	-	101250175	+	Downstream:4109	-0.796294
NC_015439.2	101251646	-	101250772	-	Upstream:342	0.851371
NC_015447.2	101252446	+	101252732	-	Downstream:7989	0.896435
NC_015444.2	101254006	-	101253699	+	Upstream:3012	0.703054
NC_015440.2	101254171	-	101253866	-	Upstream:303	-0.763244
NC_015444.2	101254217	-	101254399	+	Downstream:21143	-0.61085
NC_015439.2	101248064	+	101254450	-	Downstream:11297	0.700083
NC_015448.2	101255160	+	101254861	+	Upstream:12687	-0.609606
NC_015438.2	101256430	+	101256042	+	Upstream:5788	0.759039
NC_015439.2	101256738	+	101253447	-	overlap	0.663073
NC_015441.2	101257165	-	101256871	+	Upstream:2485	0.858018
NC_015447.2	101257415	-	101257119	+	Upstream:30789	1
NC_015446.2	101257799	-	101257501	-	Downstream:11068	1
NC_015445.2	101258575	+	101258283	+	overlap	0.758308
NC_015446.2	101258892	+	101258588	+	Downstream:7492	0.681725
NC_015448.2	101256935	-	101259109	+	Downstream:12590	0.641139
NC_015443.2	101259642	+	101259161	-	Downstream:4410	0.823285
NC_015448.2	101259702	-	101249519	+	Downstream:40868	0.679229
NC_015440.2	101259515	-	101259816	+	Downstream:5089	0.644144
NC_015449.2	101260905	+	101261201	+	Downstream:16238	0.946473
NC_015438.2	101260770	+	101261663	+	Downstream:2052	0.769551
NC_015438.2	101262048	+	101261747	+	Upstream:595	0.690199
NC_015449.2	101249991	+	101262188	-	Downstream:110	0.617639
NC_015441.2	101262413	+	101261115	-	Upstream:2137	-0.727244
NC_015443.2	101262118	-	101262422	-	Downstream:513	0.762435
NC_015448.2	101254870	+	101262685	-	Upstream:4027	0.609715
NC_015444.2	101262025	+	101262828	+	Upstream:16138	0.954367
NC_015440.2	101263394	+	101261213	+	Downstream:24882	0.687351
NC_015439.2	101263657	+	101264276	+	Downstream:91	0.612499
NC_015446.2	101255236	-	101264368	-	Downstream:94250	-0.700587
NC_015445.2	101264351	-	101264539	-	Upstream:48321	0.751615
NC_015442.2	101264325	+	101264626	-	Downstream:7941	0.614783
NC_015439.2	101264690	-	101259911	-	Upstream:9345	0.682986
NC_015441.2	101259145	+	101264917	-	Upstream:39916	0.631155
NC_015441.2	101260041	-	101264917	-	Upstream:29894	0.867191
NC_015440.2	101259518	-	101265213	-	Upstream:6635	-0.662314
NC_015448.2	101265298	-	101264692	+	Upstream:123	-0.679486
NC_015445.2	101265356	+	101249949	-	Downstream:18468	0.821002
NC_015441.2	101246626	+	101266022	-	Downstream:619	0.618339
NC_015442.2	101266222	-	101258754	+	Downstream:3251	0.968841
NC_015441.2	101251771	+	101266718	+	Downstream:2487	-0.731729
NC_015438.2	101267448	+	101258796	-	Upstream:1253	0.68336
NC_015438.2	101267458	-	101267170	+	Upstream:1382	-0.668351
NC_015439.2	101267466	+	101267180	-	Downstream:710	0.708704
NC_015439.2	101267466	+	101267951	+	Upstream:984	0.917732
NC_015447.2	101267663	-	101268154	+	Downstream:11299	0.652492
NC_015439.2	101265403	-	101268835	+	Downstream:4595	0.777715
NC_015444.2	102464321	+	101268196	+	Upstream:15094	0.701589
NC_015438.2	102464819	-	101268225	-	Downstream:5474	0.636977
NC_015443.2	104644351	-	101264728	+	Downstream:12692	0.748249
NC_015449.2	104644849	+	101251653	-	Upstream:16874	0.852405
NC_015438.2	104644957	+	101249023	+	Upstream:378	0.829653
NC_015439.2	104645532	-	101267460	+	Downstream:6163	0.662913
NC_015439.2	104645668	-	101257418	+	overlap	0.732026
NC_015439.2	104645683	-	101255942	-	Intron	0.646152
NC_015439.2	104645701	+	101245415	-	overlap	0.883682
NC_015439.2	104645701	+	101246004	-	Upstream:97	0.941163
NC_015439.2	104645887	+	101266786	+	Downstream:10304	0.697648
NC_015439.2	104645947	+	101251844	-	overlap	0.828229
NC_015439.2	104645947	+	104645946	-	Downstream:10913	0.689396
NC_015440.2	104646213	-	101267490	+	Downstream:1558	-0.603671
NC_015440.2	104646292	-	101259816	+	Upstream:15196	0.761554
NC_015440.2	104646404	-	101266701	+	Upstream:4104	0.865207
NC_015441.2	104647185	+	101244865	+	Upstream:353	0.7397
NC_015441.2	104647185	+	101245157	-	overlap	0.720888
NC_015441.2	104647234	+	101261021	+	Upstream:1502	0.699579
NC_015442.2	104647544	-	104647543	-	Upstream:22885	0.719184
NC_015438.2	104647592	+	101245786	-	Upstream:28226	0.683756
NC_015443.2	104648011	-	101265831	-	Downstream:3524	0.709381
NC_015443.2	104648011	-	101266129	+	overlap	0.842323
NC_015443.2	104648127	+	101255414	+	Upstream:3688	0.92006
NC_015444.2	104648206	-	101264137	-	Downstream:63906	0.755608
NC_015444.2	104648551	+	101263436	+	Downstream:444	1
NC_015444.2	104648559	+	101244394	-	overlap	0.814252
NC_015438.2	104648567	-	101268140	+	Upstream:4871	0.911018
NC_015445.2	104648609	+	101256900	-	Upstream:923	0.84684
NC_015445.2	101251113	+	104648919	+	Downstream:12792	-0.617874
NC_015446.2	104649350	-	101261957	+	overlap	0.703648
NC_015446.2	104649417	+	101245886	-	Downstream:542	0.760609
NC_015447.2	104649552	-	101245299	-	Upstream:50288	0.704652
NC_015447.2	104649832	+	101252446	+	Upstream:377	0.674814
NC_015447.2	104649832	+	101252732	-	Downstream:2237	0.818605
NC_015438.2	104797203	-	101257708	+	Intron	0.817656
NC_015438.2	109118842	+	101258786	-	overlap	-0.636531
NC_015449.2	109119120	-	104645144	-	Downstream:92063	0.908123
NC_015439.2	109119566	-	101265300	-	overlap	0.795496
NC_015439.2	109119566	-	101265799	+	Downstream:4292	0.662743
NC_015440.2	109119801	-	101261888	-	Downstream:1275	-0.665427
NC_015440.2	109119834	+	101249714	-	overlap	0.726556
NC_015441.2	101261510	-	109120026	-	Upstream:29399	0.858231
NC_015441.2	109120101	-	101265725	+	Downstream:19167	0.795761
NC_015438.2	109120141	-	101244520	+	Downstream:3389	0.707951
NC_015441.2	109120149	-	101264514	-	Downstream:1390	0.772502
NC_015442.2	109120320	+	101265824	-	Downstream:42561	0.951699
NC_015442.2	109120368	+	101265333	-	Upstream:39175	0.636593
NC_015443.2	109120502	-	101252494	+	overlap	0.752295
NC_015443.2	109120510	-	101264939	+	Downstream:578	-0.630463
NC_015443.2	109120526	+	101265837	+	Upstream:26	0.840526
NC_015444.2	109120787	-	101247338	-	Downstream:2953	0.998889
NC_015445.2	101254414	-	109120973	+	Upstream:27984	0.827929
NC_015447.2	109121323	+	101262755	-	Upstream:61310	0.683356
NC_015440.2	104646458	+	543524	+	Downstream:37704	1
NC_015449.2	101246404	+	543720	-	overlap	-0.654527
NC_015448.2	101262686	+	544141	-	Downstream:2441	-0.609203
NC_015446.2	109121166	+	778222	+	Intron	0.692308
NC_015438.2	XLOC_001329	+	101266673	-	Downstream:1266	0.970841
NC_015438.2	XLOC_002199	-	543905	+	overlap	0.983957
NC_015438.2	XLOC_003153	-	101264068	+	Intron	0.886846
NC_015439.2	XLOC_009738	+	101258222	+	Downstream:3052	0.705525
NC_015439.2	XLOC_011029	-	101255253	-	Downstream:327	0.919635
NC_015440.2	XLOC_015814	+	101258036	-	overlap	0.638526
NC_015440.2	XLOC_018172	-	543948	+	Upstream:7685	0.792819
NC_015446.2	XLOC_051901	+	101244220	+	Downstream:7441	0.881282
NC_015446.2	XLOC_052966	+	101245993	-	overlap	0.801679
NC_015446.2	XLOC_053512	-	101254936	+	Intron	0.711828
NC_015447.2	XLOC_058248	+	101266373	+	Downstream:24726	0.751369
NC_015447.2	XLOC_058526	+	101263558	-	overlap	-0.833651
NC_015447.2	XLOC_058661	+	109121305	-	Downstream:1088	0.745608
NC_015447.2	XLOC_058941	-	101268615	+	overlap	0.680129
NC_015447.2	XLOC_059315	-	101246675	+	overlap	0.907836
NC_015448.2	XLOC_064210	+	778341	+	Upstream:18039	0.635698
NC_015448.2	XLOC_064487	+	101251747	-	Downstream:4821	0.638302
NC_015448.2	XLOC_064730	+	104644780	-	Upstream:98	0.77919
NC_015448.2	XLOC_065722	-	101260507	+	Downstream:7377	0.660673
NC_015449.2	XLOC_069722	+	101246612	-	Downstream:384	0.608677
NC_015448.2	101245312	-	101245606	-	Downstream:1106	0.870608
NC_015438.2	101246183	-	101246668	-	Downstream:1339	0.696617
NC_015440.2	101249242	-	101248947	+	Upstream:6228	0.641064
NC_015440.2	101250200	-	101250488	+	Upstream:281	0.617254
NC_015440.2	101250776	+	101250191	+	Upstream:13408	0.661717
NC_015443.2	101253796	+	101246832	+	Upstream:902	0.888004
NC_015440.2	101254068	-	101253759	-	Upstream:1863	0.96149
NC_015445.2	101254116	+	101254320	-	Downstream:10790	0.710222
NC_015441.2	101247817	+	101254898	-	Downstream:422	0.871759
NC_015439.2	101255049	+	101254749	+	Downstream:78	0.716886
NC_015441.2	101254476	+	101255086	-	Downstream:581	0.6686
NC_015446.2	101257113	+	101257409	+	Upstream:502	0.635112
NC_015446.2	101257700	+	101257403	+	Downstream:615	0.814642
NC_015442.2	101246632	+	101258366	+	Downstream:3605	0.770623
NC_015446.2	101258900	+	101258599	-	Downstream:1086	0.95781
NC_015440.2	101260521	-	101261005	+	Downstream:1937	0.619636
NC_015447.2	101258793	+	101261071	+	Upstream:14334	0.76716
NC_015440.2	101261209	-	101245530	-	Downstream:10684	0.662485
NC_015440.2	101252270	+	101262001	-	Upstream:9938	0.760971
NC_015448.2	101261882	-	101262176	+	Downstream:2708	0.683287
NC_015439.2	101262887	+	101262587	-	Downstream:3614	0.871744
NC_015446.2	101264663	-	101262246	+	Downstream:5016	0.806204
NC_015446.2	101264663	-	101264965	-	Upstream:31251	0.65383
NC_015448.2	101266581	+	101266286	+	Upstream:279	-0.609747
NC_015441.2	101266507	-	101266817	-	Downstream:861	0.830849
NC_015449.2	101267207	-	101252964	+	Downstream:20910	0.804599
NC_015438.2	102464821	+	101263446	-	Upstream:5272	0.831349
NC_015444.2	102466346	+	101268196	+	Upstream:525	0.701589
NC_015447.2	104644396	+	101266884	-	Downstream:5699	0.664106
NC_015448.2	104644460	+	101253339	+	Downstream:26314	0.800376
NC_015448.2	104644469	+	101258517	-	overlap	0.814005
NC_015448.2	104644503	-	101262979	-	Upstream:5694	0.731929
NC_015448.2	101249880	+	104644576	+	Downstream:38112	-0.681233
NC_015448.2	104644646	-	101263079	+	Downstream:83659	0.687998
NC_015448.2	104644663	-	101250859	-	Downstream:1263	0.830317
NC_015449.2	104645183	-	101262093	-	Intron	0.608736
NC_015439.2	104645644	+	101243654	+	Intron	0.920329
NC_015439.2	104645669	-	101248063	+	Upstream:6331	0.703547
NC_015439.2	104645723	-	101252845	+	Downstream:35626	0.707936
NC_015439.2	104645772	+	101252453	-	Downstream:2300	0.786941
NC_015439.2	101249138	-	104645842	+	Upstream:3390	0.823441
NC_015439.2	104645983	+	101255266	+	Upstream:10468	0.642878
NC_015440.2	104646541	-	101266205	+	overlap	-0.901291
NC_015440.2	104646541	-	101267100	+	Upstream:15181	-0.899996
NC_015440.2	104646554	+	101249341	-	Downstream:2221	0.970607
NC_015440.2	104646554	+	101262097	+	Upstream:537	0.947002
NC_015440.2	104646617	-	101250005	-	Downstream:5864	0.785556
NC_015441.2	104646740	+	104646739	-	Downstream:9208	-0.909717
NC_015442.2	104647316	+	101256674	-	Downstream:1701	0.918261
NC_015442.2	104647344	-	101268865	-	Downstream:11106	0.618487
NC_015442.2	104647606	-	101260644	-	Downstream:36299	0.690848
NC_015443.2	104647980	+	101245066	+	Upstream:4248	0.845225
NC_015443.2	104648013	-	101267613	+	Upstream:448	0.652131
NC_015443.2	104648031	-	101244493	-	Upstream:9770	0.644165
NC_015444.2	104648376	+	101267326	+	Downstream:7509	0.946088
NC_015444.2	104648406	+	101262227	+	Downstream:839	0.645628
NC_015445.2	104648808	+	101264141	-	Upstream:23591	0.769458
NC_015446.2	104649069	-	101257207	+	Downstream:6853	0.839785
NC_015447.2	104649636	+	101266680	-	Downstream:109	0.601248
NC_015447.2	104649680	+	101266465	+	Upstream:56411	0.801503
NC_015447.2	104649705	-	101260281	+	Downstream:13443	0.975829
NC_015440.2	104795594	+	101250285	+	Upstream:25804	0.889582
NC_015448.2	109118990	+	101247387	-	Downstream:1551	0.875772
NC_015440.2	109119802	+	101266392	-	overlap	0.82453
NC_015442.2	109120338	+	101265332	-	Upstream:28693	0.686731
NC_015443.2	109120429	+	101267316	+	Upstream:12009	0.794127
NC_015444.2	109120794	-	101258671	+	overlap	0.990674
NC_015445.2	109120945	-	101246741	+	Upstream:3418	-0.889275
NC_015440.2	104646480	-	543948	+	Upstream:10073	0.812489
NC_015438.2	XLOC_000043	+	778218	-	Upstream:4014	-0.854528
NC_015438.2	XLOC_001557	+	101266981	-	Upstream:2515	-0.721337
NC_015438.2	XLOC_002450	-	101249203	-	Downstream:16522	0.965525
NC_015438.2	XLOC_003285	-	101249496	-	Downstream:1236	0.695323
NC_015439.2	XLOC_009519	+	101255844	-	overlap	0.752806
NC_015440.2	XLOC_016330	+	101250379	-	Upstream:25197	0.626535
NC_015440.2	XLOC_018498	-	101257256	+	Downstream:717	-0.858749
NC_015441.2	XLOC_024204	-	101252278	-	Downstream:28407	0.746025
NC_015442.2	XLOC_028993	+	109120277	-	overlap	0.749695
NC_015442.2	XLOC_030158	-	109120277	-	Upstream:3016	0.68567
NC_015446.2	XLOC_052663	+	101261956	-	Intron	0.672689
NC_015446.2	XLOC_052989	-	101254025	-	Downstream:2164	0.722816
NC_015447.2	XLOC_059552	-	101267173	-	Upstream:1935	0.830857
NC_015448.2	XLOC_065605	-	101255460	+	overlap	-0.656214
NC_015449.2	XLOC_068944	+	101261588	-	overlap	0.651152
NC_015449.2	XLOC_069726	+	101262604	-	Downstream:22	-0.608256
NC_015449.2	XLOC_069726	+	101263096	-	Upstream:1455	-0.602703
NC_015449.2	XLOC_070073	-	101267686	-	Upstream:2276	0.739676
NC_015449.2	XLOC_070803	-	101249163	-	Downstream:463	0.90049
NC_015449.2	XLOC_070803	-	101249445	+	overlap	0.919939
NC_015447.2	101244241	+	101244726	-	Downstream:4389	0.703203
NC_015449.2	101244938	+	101055526	-	Upstream:6933	-0.627299
NC_015444.2	101245565	+	101247141	+	Upstream:334	0.870087
NC_015445.2	101247642	+	101247348	+	Downstream:89280	0.862587
NC_015438.2	101248421	-	101248135	+	Upstream:189	0.71804
NC_015446.2	101250445	-	101250735	+	Downstream:20033	0.746216
NC_015444.2	101251006	+	101251902	+	Upstream:2614	0.837897
NC_015449.2	101252367	+	101252061	-	Downstream:579	-0.883863
NC_015440.2	101247418	-	101254289	-	Downstream:6843	0.843153
NC_015443.2	101254309	+	101253799	-	Downstream:3305	0.656367
NC_015443.2	101254602	-	101254307	+	Downstream:1124	-0.740699
NC_015438.2	101255441	-	101253537	+	Upstream:9606	0.863715
NC_015438.2	101255617	+	101255122	-	Downstream:932	0.830745
NC_015439.2	101255857	-	101249877	-	Downstream:669	0.678881
NC_015442.2	101254486	+	101256674	-	Downstream:2621	0.936558
NC_015449.2	101257238	+	101257536	-	Downstream:556	0.706447
NC_015448.2	101258024	+	101259017	+	Upstream:2478	0.755758
NC_015440.2	101259523	+	101259228	-	Downstream:389	0.665776
NC_015447.2	101257912	+	101259694	+	Upstream:3534	0.768043
NC_015446.2	101259367	+	101259880	-	Upstream:43994	-0.737004
NC_015445.2	101260071	-	101252010	-	Downstream:13890	0.770032
NC_015439.2	101259798	-	101260096	+	Upstream:3294	0.729706
NC_015438.2	101257612	+	101260175	-	Downstream:2109	0.769683
NC_015438.2	101260877	+	101261170	+	Upstream:2174	0.947425
NC_015448.2	101261186	+	101260891	+	Upstream:1516	0.737445
NC_015440.2	101261403	-	101259425	-	Upstream:3586	-0.613458
NC_015443.2	101261525	+	100037501	+	Upstream:22697	0.680249
NC_015440.2	101262097	+	101249341	-	Downstream:3985	0.986759
NC_015440.2	101262602	-	101244562	-	Upstream:15828	0.832286
NC_015446.2	101262948	+	101249397	+	Downstream:641	-0.643479
NC_015438.2	101259685	-	101263255	+	Downstream:220	0.675188
NC_015438.2	101263255	+	101262668	-	Upstream:6021	0.851637
NC_015439.2	101263664	-	101262583	+	Downstream:3210	-0.652363
NC_015444.2	101264229	-	101259857	+	Downstream:3728	0.763832
NC_015445.2	101264746	+	101263926	+	Downstream:5360	0.750584
NC_015441.2	101246626	+	101265726	+	Upstream:1166	0.894792
NC_015440.2	101252270	+	101267218	-	Downstream:840	0.615173
NC_015449.2	101267289	-	101267291	-	Upstream:2847	-0.612979
NC_015442.2	101268395	+	101267525	-	Downstream:20661	0.863744
NC_015440.2	102464677	+	101260709	-	Upstream:14844	0.64263
NC_015448.2	104644470	-	101258716	+	Upstream:1757	0.808169
NC_015449.2	104644853	-	101262594	+	overlap	0.939517
NC_015449.2	104644969	+	104645040	-	Downstream:31132	1
NC_015449.2	104645129	-	101250973	-	Downstream:1271	0.815339
NC_015439.2	104645528	+	101263950	-	Downstream:37515	0.736942
NC_015439.2	104645671	+	101268838	-	overlap	0.652955
NC_015439.2	101243757	+	104645678	-	Downstream:3370	0.978972
NC_015439.2	104645754	-	104645753	-	Downstream:47885	0.74431
NC_015439.2	104645775	-	101255650	-	Downstream:4230	0.811687
NC_015440.2	104646262	+	101262290	+	Intron	0.799299
NC_015440.2	104646281	-	101254574	-	Upstream:21169	0.61333
NC_015438.2	104646497	+	101262747	-	Downstream:21353	0.744961
NC_015440.2	104646515	-	101263093	+	Downstream:4218	-0.886308
NC_015440.2	101246522	+	104646606	+	Downstream:5987	0.966926
NC_015441.2	104646683	+	101256765	+	Downstream:502	0.823124
NC_015442.2	104647305	+	101251776	-	Upstream:9811	0.642291
NC_015442.2	104647305	+	101252081	-	Downstream:876	0.818105
NC_015442.2	104647393	-	101248391	-	Upstream:70144	0.760154
NC_015443.2	104647967	+	101250702	-	Upstream:3793	0.707674
NC_015443.2	104648022	-	101268192	+	overlap	0.653277
NC_015443.2	104648049	+	101258965	-	Downstream:6265	0.981638
NC_015443.2	104648078	-	101260829	+	Upstream:1280	0.788039
NC_015444.2	104648147	+	101256194	-	Upstream:437	0.767253
NC_015446.2	104649071	-	101247549	-	Downstream:779	0.894605
NC_015446.2	104649094	+	104649093	+	Downstream:531	0.7232
NC_015441.2	104795595	+	101251179	-	Downstream:3405	0.611384
NC_015442.2	107832856	+	101259632	+	Upstream:214	-0.769553
NC_015438.2	109118977	+	101263159	+	Upstream:1718	0.687393
NC_015449.2	109119188	+	104645081	-	Upstream:29975	0.777382
NC_015438.2	109119321	+	101251524	-	Downstream:3746	0.74987
NC_015439.2	101266381	+	109119496	+	Upstream:56	0.632264
NC_015440.2	109119764	-	101250191	+	Downstream:2069	0.798644
NC_015440.2	109119828	-	101245037	+	Downstream:15221	0.664141
NC_015440.2	109119885	-	101244569	-	Upstream:7828	-0.623392
NC_015440.2	109119902	-	100316894	+	Downstream:3057	0.645061
NC_015442.2	101252179	-	109120279	+	Downstream:22953	-0.612346
NC_015444.2	109120796	-	101246734	-	Downstream:251	0.974257
NC_015444.2	109120796	-	101262230	+	overlap	-0.622614
NC_015445.2	109120947	-	101257492	+	Downstream:75318	0.967021
NC_015446.2	109121171	+	101248613	-	Upstream:37147	0.945759
NC_015439.2	104645523	+	543533	+	Upstream:1073	0.865797
NC_015447.2	104649684	-	543685	-	Downstream:10503	0.611686
NC_015445.2	543901	+	101266439	+	Downstream:785	0.767325
NC_015439.2	104645671	+	544160	+	Downstream:7076	0.930692
NC_015445.2	104648951	-	778259	-	Upstream:9844	0.61087
NC_015438.2	XLOC_000232	+	101264545	-	Downstream:1550	0.755473
NC_015439.2	XLOC_011551	-	101262772	+	Intron	0.631286
NC_015440.2	XLOC_015938	+	101262783	-	Downstream:54	-0.603718
NC_015440.2	XLOC_016408	+	101255072	-	overlap	0.990522
NC_015440.2	XLOC_018382	-	101252674	+	Downstream:3933	-0.713996
NC_015440.2	XLOC_018782	-	104646524	+	overlap	0.973624
NC_015440.2	XLOC_018782	-	544009	+	Downstream:18793	0.676553
NC_015441.2	XLOC_023292	+	101266933	+	Upstream:449	0.935989
NC_015442.2	XLOC_028994	+	109120277	-	Upstream:18055	0.640005
NC_015442.2	XLOC_029943	-	101243892	-	Downstream:1502	0.970247
NC_015442.2	XLOC_029943	-	101264930	+	overlap	0.744494
NC_015443.2	XLOC_035583	+	101255305	-	Intron	0.966153
NC_015443.2	XLOC_036170	-	101264730	+	overlap	0.608064
NC_015443.2	XLOC_036170	-	101265342	+	Downstream:15753	0.751759
NC_015444.2	XLOC_041034	+	544163	-	Downstream:11291	0.713181
NC_015445.2	XLOC_046033	+	101257195	+	Upstream:1741	0.690066
NC_015445.2	XLOC_046033	+	101262541	-	overlap	0.629438
NC_015446.2	XLOC_052215	+	101253520	+	Downstream:20971	0.879155
NC_015446.2	XLOC_054079	-	544304	+	overlap	0.920463
NC_015447.2	XLOC_058786	-	101260673	-	Downstream:2186	0.656713
NC_015447.2	XLOC_058786	-	101260974	+	overlap	0.868883
NC_015448.2	XLOC_064367	+	101259603	-	overlap	0.773177
NC_015448.2	XLOC_064530	+	101265304	+	Downstream:13925	-0.860021
NC_015449.2	XLOC_069504	+	101254174	-	Upstream:39734	0.932564
NC_015449.2	XLOC_070097	-	104644839	+	overlap	0.92263
NC_015449.2	XLOC_070264	-	101251156	+	Downstream:3018	0.638069
