# Supplementary material for: LncRNA expression profile and ceRNA analysis in tomato during flowering
Source: PLoS One. 2019 Jan 17;14(1):e0210650. doi: 10.1371/journal.pone.0210650 (PMC6336255; doi:10.1371/journal.pone.0210650)
Supplement: S7 Table — (XLSX) [file pone.0210650.s009.xlsx]

## Sheet: S6 Table
S6 Table：Network relationship of lncRNA-miRNA-mRNA
miRNA	target gene ID	target ID	type	annotation
sly-miR5303	101258069	XM_019213827.1	mRNA	PREDICTED: Solanum lycopersicum WEB family protein At5g16730, chloroplastic-like (LOC101258069)
sly-miR156a	101268335	XM_019210970.1	mRNA	PREDICTED: Solanum lycopersicum serine/threonine-protein kinase ATG1t (LOC101268335), transcript variant X3
sly-miR169c	101257995	XM_004228610.3	mRNA	PREDICTED: Solanum lycopersicum nuclear transcription factor Y subunit A-10 (LOC101257995)
sly-miR9470-3p	101249506	XM_010313861.2	mRNA	PREDICTED: Solanum lycopersicum bifunctional protein FolD 2 (LOC101249506), transcript variant X2
sly-miR482a	101262730	XM_010324556.2	mRNA	PREDICTED: Solanum lycopersicum putative late blight resistance protein homolog R1B-23 (LOC101262730), transcript variant X1
sly-miR6024	101267186	XM_004232385.3	mRNA	PREDICTED: Solanum lycopersicum disease resistance RPP13-like protein 4 (LOC101267186)
sly-miR482b	101266052	XM_010326526.2	mRNA	PREDICTED: Solanum lycopersicum pentatricopeptide repeat-containing protein At1g77405 (LOC101266052), transcript variant X1
sly-miR482b	101248751	XM_004252090.3	mRNA	PREDICTED: Solanum lycopersicum probable disease resistance protein At4g27220 (LOC101248751)
sly-miR156b	101253448	XM_019212257.1	mRNA	PREDICTED: Solanum lycopersicum cationic amino acid transporter 1 (LOC101253448), transcript variant X2
sly-miR397	101251829	XM_004249036.2	mRNA	PREDICTED: Solanum lycopersicum laccase-4-like (LOC101251829)
sly-miR156e-5p	101261007	XM_004236023.2	mRNA	PREDICTED: Solanum lycopersicum squamosa promoter-binding-like protein (LOC101261007)
sly-miR5303	101255967	XM_010315889.2	mRNA	PREDICTED: Solanum lycopersicum probable DNA double-strand break repair Rad50 ATPase (LOC101255967), transcript variant X5
sly-miR169e-3p	101251361	XM_004234727.3	mRNA	PREDICTED: Solanum lycopersicum small G protein signaling modulator 1-like (LOC101251361), transcript variant X1
sly-miR6024	101262730	XM_004241902.3	mRNA	PREDICTED: Solanum lycopersicum putative late blight resistance protein homolog R1B-23 (LOC101262730), transcript variant X2
sly-miR5303	101268235	XM_019211458.1	mRNA	PREDICTED: Solanum lycopersicum (+)-neomenthol dehydrogenase-like (LOC101268235), transcript variant X4
sly-miR1918	101265194	XM_004250247.3	mRNA	PREDICTED: Solanum lycopersicum oligopeptide transporter 3 (LOC101265194), transcript variant X1
sly-miR169b	101247294	XM_010315461.2	mRNA	PREDICTED: Solanum lycopersicum nuclear transcription factor Y subunit A-7-like (LOC101247294), transcript variant X4
sly-miR169c	101247294	XM_010315459.2	mRNA	PREDICTED: Solanum lycopersicum nuclear transcription factor Y subunit A-7-like (LOC101247294), transcript variant X2
sly-miR156b	101250753	XM_004249116.3	mRNA	PREDICTED: Solanum lycopersicum squamosa promoter-binding-like protein 9 (LOC101250753)
sly-miR6024	101256949	XM_010315373.2	mRNA	PREDICTED: Solanum lycopersicum putative late blight resistance protein homolog R1B-16 (LOC101256949)
sly-miR169b	101264750	XM_004228468.3	mRNA	PREDICTED: Solanum lycopersicum nuclear transcription factor Y subunit A-1 (LOC101264750)
sly-miR5303	543650	NM_001247520.2	mRNA	Solanum lycopersicum aldehyde oxidase (AO1)
sly-miR156b	101251286	XM_004239190.3	mRNA	PREDICTED: Solanum lycopersicum teosinte glume architecture 1 (LOC101251286), transcript variant X2
sly-miR5303	104646731	XM_010321089.2	mRNA	PREDICTED: Solanum lycopersicum kirola-like (LOC104646731)
sly-miR169c	101255224	XM_004245120.3	mRNA	PREDICTED: Solanum lycopersicum probable glycosyltransferase At3g07620 (LOC101255224)
sly-miR1917	543907	NM_001247525.1	mRNA	Solanum lycopersicum CTR1-like protein kinase (CTR3)
sly-miR169b	101246742	XM_004245011.3	mRNA	PREDICTED: Solanum lycopersicum nuclear transcription factor Y subunit A-8 (LOC101246742), transcript variant X1
sly-miR156a	101251286	XM_010322715.2	mRNA	PREDICTED: Solanum lycopersicum teosinte glume architecture 1 (LOC101251286), transcript variant X1
sly-miR5303	101265650	XM_019214162.1	mRNA	PREDICTED: Solanum lycopersicum receptor-like cytosolic serine/threonine-protein kinase RBK2 (LOC101265650), transcript variant X2
sly-miR156c	101246055	XM_004239169.3	mRNA	PREDICTED: Solanum lycopersicum squamosa promoter-binding-like protein 12 (LOC101246055), transcript variant X6
sly-miR1917	101265762	XM_010317675.2	mRNA	PREDICTED: Solanum lycopersicum putative E3 ubiquitin-protein ligase LIN-2 (LOC101265762), transcript variant X2
sly-miR156b	101253448	XM_004233094.3	mRNA	PREDICTED: Solanum lycopersicum cationic amino acid transporter 1 (LOC101253448), transcript variant X1
sly-miR156b	101251286	XM_004239191.3	mRNA	PREDICTED: Solanum lycopersicum teosinte glume architecture 1 (LOC101251286), transcript variant X5
sly-miR156c	101253448	XM_004233094.3	mRNA	PREDICTED: Solanum lycopersicum cationic amino acid transporter 1 (LOC101253448), transcript variant X1
sly-miR6022	101267635	XM_004228395.3	mRNA	PREDICTED: Solanum lycopersicum receptor-like protein 12 (LOC101267635), transcript variant X2
sly-miR156c	101266411	XM_010321302.2	mRNA	PREDICTED: Solanum lycopersicum probable lysine-specific demethylase ELF6 (LOC101266411)
sly-miR156c	101246055	XM_010322704.2	mRNA	PREDICTED: Solanum lycopersicum squamosa promoter-binding-like protein 12 (LOC101246055), transcript variant X2
sly-miR156b	101246055	XM_010322703.2	mRNA	PREDICTED: Solanum lycopersicum squamosa promoter-binding-like protein 12 (LOC101246055), transcript variant X3
sly-miR5303	101265650	XM_019214163.1	mRNA	PREDICTED: Solanum lycopersicum receptor-like cytosolic serine/threonine-protein kinase RBK2 (LOC101265650), transcript variant X3
sly-miR156d-5p	101262615	XM_004238983.3	mRNA	PREDICTED: Solanum lycopersicum squamosa promoter-binding-like protein 6 (LOC101262615)
sly-miR5303	101250229	XM_004242450.3	mRNA	PREDICTED: Solanum lycopersicum UDP-glycosyltransferase 87A1 (LOC101250229)
sly-miR6024	101243759	XM_019211209.1	mRNA	PREDICTED: Solanum lycopersicum putative late blight resistance protein homolog R1A-3 (LOC101243759), transcript variant X2
sly-miR6024	101262178	XM_004233828.3	mRNA	PREDICTED: Solanum lycopersicum putative late blight resistance protein homolog R1C-3 (LOC101262178)
sly-miR164a-5p	101261222	XM_004237208.3	mRNA	PREDICTED: Solanum lycopersicum protein LSM12 homolog (LOC101261222)
sly-miR156c	101251286	XM_004239190.3	mRNA	PREDICTED: Solanum lycopersicum teosinte glume architecture 1 (LOC101251286), transcript variant X2
sly-miR5303	101248709	XM_019215412.1	mRNA	PREDICTED: Solanum lycopersicum cyclic pyranopterin monophosphate synthase, mitochondrial (LOC101248709), transcript variant X1
sly-miR5303	101259366	XM_010328257.1	mRNA	PREDICTED: Solanum lycopersicum probable receptor-like protein kinase At5g47070 (LOC101259366), transcript variant X2
sly-miR156d-5p	101246055	XM_010322704.2	mRNA	PREDICTED: Solanum lycopersicum squamosa promoter-binding-like protein 12 (LOC101246055), transcript variant X2
sly-miR156b	101253448	XM_019212258.1	mRNA	PREDICTED: Solanum lycopersicum cationic amino acid transporter 1 (LOC101253448), transcript variant X3
sly-miR156a	101256245	NM_001319308.1	mRNA	Solanum lycopersicum SQUAMOSA promoter binding protein-like (LeSPL-CNR)
sly-miR156d-5p	101248216	XM_004243319.2	mRNA	PREDICTED: Solanum lycopersicum squamosa promoter-binding-like protein 3 (LOC101248216)
sly-miR156a	101251286	XM_019214096.1	mRNA	PREDICTED: Solanum lycopersicum teosinte glume architecture 1 (LOC101251286), transcript variant X3
sly-miR482d-3p	101262730	XM_004241902.3	mRNA	PREDICTED: Solanum lycopersicum putative late blight resistance protein homolog R1B-23 (LOC101262730), transcript variant X2
sly-miR156a	101248216	XM_004243319.2	mRNA	PREDICTED: Solanum lycopersicum squamosa promoter-binding-like protein 3 (LOC101248216)
sly-miR156a	101264297	XM_004252201.3	mRNA	PREDICTED: Solanum lycopersicum squamosa promoter-binding-like protein 6 (LOC101264297)
sly-miR169d	101247462	XM_019213207.1	mRNA	PREDICTED: Solanum lycopersicum nuclear transcription factor Y subunit A-9 (LOC101247462), transcript variant X1
sly-miR396b	101258918	XM_004233817.3	mRNA	PREDICTED: Solanum lycopersicum uncharacterized LOC101258918 (LOC101258918), transcript variant X2
sly-miR169d	101247462	XM_019213218.1	mRNA	PREDICTED: Solanum lycopersicum nuclear transcription factor Y subunit A-9 (LOC101247462), transcript variant X3
sly-miR169c	101265980	XM_019216175.1	mRNA	PREDICTED: Solanum lycopersicum nuclear transcription factor Y subunit A-10-like (LOC101265980), transcript variant X3
sly-miR396b	101256683	XM_004241796.3	mRNA	PREDICTED: Solanum lycopersicum transmembrane 9 superfamily member 1-like (LOC101256683)
sly-miR482c	101244161	XM_019211305.1	mRNA	PREDICTED: Solanum lycopersicum putative late blight resistance protein homolog R1B-16 (LOC101244161), transcript variant X2
sly-miR5303	101262313	XM_004239910.3	mRNA	PREDICTED: Solanum lycopersicum laccase-12-like (LOC101262313)
sly-miR396b	101254030	XM_010328292.2	mRNA	PREDICTED: Solanum lycopersicum transcription factor bHLH125-like (LOC101254030), transcript variant X2
sly-miR5303	101255342	XM_004248834.3	mRNA	PREDICTED: Solanum lycopersicum protein SHI RELATED SEQUENCE 3-like (LOC101255342), transcript variant X2
sly-miR9470-3p	101261138	XM_004244115.3	mRNA	PREDICTED: Solanum lycopersicum uncharacterized LOC101261138 (LOC101261138)
sly-miR164a-5p	101256624	XM_004229201.3	mRNA	PREDICTED: Solanum lycopersicum UDP-glucuronic acid decarboxylase 4-like (LOC101256624)
sly-miR396a-5p	100135704	NM_001246974.2	mRNA	Solanum lycopersicum DNA cytosine 5-methyltransferase-like (DRM5)
sly-miR5303	104644457	XM_010314254.2	mRNA	PREDICTED: Solanum lycopersicum F-box protein At5g65850-like (LOC104644457), transcript variant X2
sly-miR156d-5p	101245642	XM_004237646.3	mRNA	PREDICTED: Solanum lycopersicum squamosa promoter-binding-like protein 3 (LOC101245642)
sly-miR6024	101266073	XM_019216095.1	mRNA	PREDICTED: Solanum lycopersicum putative late blight resistance protein homolog R1B-12 (LOC101266073), transcript variant X4
sly-miR6024	101245079	XM_010326305.2	mRNA	PREDICTED: Solanum lycopersicum putative disease resistance protein RGA3 (LOC101245079)
sly-miR156a	101251286	XM_004239190.3	mRNA	PREDICTED: Solanum lycopersicum teosinte glume architecture 1 (LOC101251286), transcript variant X2
sly-miR482b	101254234	XM_010322928.2	mRNA	PREDICTED: Solanum lycopersicum probable disease resistance protein At1g61300 (LOC101254234)
sly-miR156b	101256245	NM_001319308.1	mRNA	Solanum lycopersicum SQUAMOSA promoter binding protein-like (LeSPL-CNR)
sly-miR156d-5p	101261007	XM_004236023.2	mRNA	PREDICTED: Solanum lycopersicum squamosa promoter-binding-like protein (LOC101261007)
sly-miR9470-3p	101249506	XM_004249277.3	mRNA	PREDICTED: Solanum lycopersicum bifunctional protein FolD 2 (LOC101249506), transcript variant X1
sly-miR5303	101248701	XM_004228498.3	mRNA	PREDICTED: Solanum lycopersicum protein ALTERED XYLOGLUCAN 4 (LOC101248701)
sly-miR169c	101264750	XM_004228468.3	mRNA	PREDICTED: Solanum lycopersicum nuclear transcription factor Y subunit A-1 (LOC101264750)
sly-miR5303	101253583	XM_010322076.1	mRNA	PREDICTED: Solanum lycopersicum probable protein phosphatase 2C 55 (LOC101253583), transcript variant X3
sly-miR169c	101248742	XM_010314971.2	mRNA	PREDICTED: Solanum lycopersicum nuclear transcription factor Y subunit A-1 (LOC101248742), transcript variant X1
sly-miR390b-5p	101245637	XM_010320888.2	mRNA	PREDICTED: Solanum lycopersicum leucine-rich repeat receptor-like tyrosine-protein kinase PXC3 (LOC101245637), transcript variant X3
sly-miR9470-3p	101261662	XM_019216100.1	mRNA	PREDICTED: Solanum lycopersicum protein LHY (LOC101261662), transcript variant X3
sly-miR5303	101266784	XM_004250548.3	mRNA	PREDICTED: Solanum lycopersicum uncharacterized LOC101266784 (LOC101266784)
sly-miR169c	101247294	XM_010315460.2	mRNA	PREDICTED: Solanum lycopersicum nuclear transcription factor Y subunit A-7-like (LOC101247294), transcript variant X3
sly-miR156a	101245642	XM_004237646.3	mRNA	PREDICTED: Solanum lycopersicum squamosa promoter-binding-like protein 3 (LOC101245642)
sly-miR5303	101255100	XM_004239968.3	mRNA	PREDICTED: Solanum lycopersicum BTB/POZ domain-containing protein DOT3 (LOC101255100), transcript variant X2
sly-miR156b	101251286	XM_019214096.1	mRNA	PREDICTED: Solanum lycopersicum teosinte glume architecture 1 (LOC101251286), transcript variant X3
sly-miR5303	101247294	XM_004251633.3	mRNA	PREDICTED: Solanum lycopersicum nuclear transcription factor Y subunit A-7-like (LOC101247294), transcript variant X1
sly-miR482c	101268158	XM_019210877.1	mRNA	PREDICTED: Solanum lycopersicum putative late blight resistance protein homolog R1B-16 (LOC101268158)
sly-miR169c	101263620	XM_010324324.2	mRNA	PREDICTED: Solanum lycopersicum protein TIFY 6B-like (LOC101263620)
sly-miR156b	101247064	XM_004229663.3	mRNA	PREDICTED: Solanum lycopersicum uncharacterized LOC101247064 (LOC101247064)
sly-miR6022	101247650	XM_004228575.3	mRNA	PREDICTED: Solanum lycopersicum disease resistance protein Cf-9-like (LOC101247650), transcript variant X1
sly-miR156e-5p	778314	NM_001247171.3	mRNA	Solanum lycopersicum tobamovirus multiplication 1 homolog 2 (TH2)
sly-miR5303	101248845	XM_004234032.3	mRNA	PREDICTED: Solanum lycopersicum receptor-like protein 51 (LOC101248845)
sly-miR164b-5p	101263350	XM_010327149.2	mRNA	PREDICTED: Solanum lycopersicum uncharacterized LOC101263350 (LOC101263350), transcript variant X3
sly-miR156d-5p	101246055	XM_004239169.3	mRNA	PREDICTED: Solanum lycopersicum squamosa promoter-binding-like protein 12 (LOC101246055), transcript variant X6
sly-miR156e-5p	101261948	XM_010318237.2	mRNA	PREDICTED: Solanum lycopersicum 65-kDa microtubule-associated protein 6-like (LOC101261948), transcript variant X4
sly-miR5303	104644505	XM_019210986.1	mRNA	PREDICTED: Solanum lycopersicum uncharacterized LOC104644505 (LOC104644505), transcript variant X2
sly-miR169c	101248742	XM_010314972.2	mRNA	PREDICTED: Solanum lycopersicum nuclear transcription factor Y subunit A-1 (LOC101248742), transcript variant X2
sly-miR156a	101246055	XM_004239169.3	mRNA	PREDICTED: Solanum lycopersicum squamosa promoter-binding-like protein 12 (LOC101246055), transcript variant X6
sly-miR169d	101265980	XM_019216174.1	mRNA	PREDICTED: Solanum lycopersicum nuclear transcription factor Y subunit A-10-like (LOC101265980), transcript variant X1
sly-miR390b-5p	101264156	XM_004247808.3	mRNA	PREDICTED: Solanum lycopersicum ER lumen protein-retaining receptor (LOC101264156)
sly-miR482a	101255934	XM_019212836.1	mRNA	PREDICTED: Solanum lycopersicum TMV resistance protein N (LOC101255934)
sly-miR164a-5p	101249957	XM_010327860.1	mRNA	PREDICTED: Solanum lycopersicum UDP-glucuronic acid decarboxylase 1 (LOC101249957), partial mRNA
sly-miR5303	101247054	XM_004228492.3	mRNA	PREDICTED: Solanum lycopersicum uncharacterized protein At4g14100 (LOC101247054)
sly-miR156a	101253448	XM_019212257.1	mRNA	PREDICTED: Solanum lycopersicum cationic amino acid transporter 1 (LOC101253448), transcript variant X2
sly-miR156e-5p	101260594	XM_004249976.3	mRNA	PREDICTED: Solanum lycopersicum acyl-CoA-binding domain-containing protein 4 (LOC101260594)
sly-miR482a	101264881	XM_010314290.2	mRNA	PREDICTED: Solanum lycopersicum probable pectate lyase 13 (LOC101264881), transcript variant X3
sly-miR5303	101259366	XM_004247327.3	mRNA	PREDICTED: Solanum lycopersicum probable receptor-like protein kinase At5g47070 (LOC101259366), transcript variant X1
sly-miR5303	101253265	XM_019211534.1	mRNA	PREDICTED: Solanum lycopersicum inositol-tetrakisphosphate 1-kinase 3 (LOC101253265), transcript variant X2
sly-miR319c-3p	100037511	XM_010323744.2	mRNA	PREDICTED: Solanum lycopersicum GAMyb-like1 (LOC100037511), transcript variant X2
sly-miR156c	101246055	XM_010322706.2	mRNA	PREDICTED: Solanum lycopersicum squamosa promoter-binding-like protein 12 (LOC101246055), transcript variant X5
sly-miR156b	101245642	XM_004237646.3	mRNA	PREDICTED: Solanum lycopersicum squamosa promoter-binding-like protein 3 (LOC101245642)
sly-miR156c	101250753	XM_004249116.3	mRNA	PREDICTED: Solanum lycopersicum squamosa promoter-binding-like protein 9 (LOC101250753)
sly-miR9472-3p	101266659	XM_004245157.3	mRNA	PREDICTED: Solanum lycopersicum 3-ketoacyl-CoA synthase 10 (LOC101266659)
sly-miR156e-5p	104649496	XM_010328930.2	mRNA	PREDICTED: Solanum lycopersicum equilibrative nucleotide transporter 3-like (LOC104649496), transcript variant X2
sly-miR156e-5p	101261948	XM_010318226.2	mRNA	PREDICTED: Solanum lycopersicum 65-kDa microtubule-associated protein 6-like (LOC101261948), transcript variant X1
sly-miR5303	101259520	XM_004252851.3	mRNA	PREDICTED: Solanum lycopersicum WAT1-related protein At3g30340-like (LOC101259520)
sly-miR6024	101268158	XM_019210877.1	mRNA	PREDICTED: Solanum lycopersicum putative late blight resistance protein homolog R1B-16 (LOC101268158)
sly-miR156e-5p	101264297	XM_004252201.3	mRNA	PREDICTED: Solanum lycopersicum squamosa promoter-binding-like protein 6 (LOC101264297)
sly-miR169b	101259926	XM_004235526.3	mRNA	PREDICTED: Solanum lycopersicum nuclear transcription factor Y subunit A-3 (LOC101259926), transcript variant X2
sly-miR1917	101248526	XM_010329154.2	mRNA	PREDICTED: Solanum lycopersicum sodium channel modifier 1 (LOC101248526), transcript variant X5
sly-miR156d-5p	101256245	NM_001319308.1	mRNA	Solanum lycopersicum SQUAMOSA promoter binding protein-like (LeSPL-CNR)
sly-miR156e-5p	101251286	XM_004239190.3	mRNA	PREDICTED: Solanum lycopersicum teosinte glume architecture 1 (LOC101251286), transcript variant X2
sly-miR397	101253311	XM_004246291.3	mRNA	PREDICTED: Solanum lycopersicum laccase-4 (LOC101253311)
sly-miR482c	101261341	XM_004243445.3	mRNA	PREDICTED: Solanum lycopersicum putative late blight resistance protein homolog R1B-16 (LOC101261341), transcript variant X1
sly-miR482c	101249231	XM_004250361.3	mRNA	PREDICTED: Solanum lycopersicum putative late blight resistance protein homolog R1B-16 (LOC101249231)
sly-miR156c	101246055	XM_010322705.2	mRNA	PREDICTED: Solanum lycopersicum squamosa promoter-binding-like protein 12 (LOC101246055), transcript variant X4
sly-miR9478-3p	101248189	XM_004237389.3	mRNA	PREDICTED: Solanum lycopersicum uncharacterized protein sll1770 (LOC101248189), transcript variant X1
sly-miR164b-5p	101249957	XM_010327860.1	mRNA	PREDICTED: Solanum lycopersicum UDP-glucuronic acid decarboxylase 1 (LOC101249957), partial mRNA
sly-miR169b	101247294	XM_010315459.2	mRNA	PREDICTED: Solanum lycopersicum nuclear transcription factor Y subunit A-7-like (LOC101247294), transcript variant X2
sly-miR5303	108281193	XM_019215996.1	mRNA	PREDICTED: Solanum lycopersicum carbonyl reductase-like (LOC108281193)
sly-miR482c	101261341	XM_010325546.2	mRNA	PREDICTED: Solanum lycopersicum putative late blight resistance protein homolog R1B-16 (LOC101261341), transcript variant X2
sly-miR482d-3p	101262730	XM_010324556.2	mRNA	PREDICTED: Solanum lycopersicum putative late blight resistance protein homolog R1B-23 (LOC101262730), transcript variant X1
sly-miR169e-3p	101249343	XM_010320122.2	mRNA	PREDICTED: Solanum lycopersicum uncharacterized LOC101249343 (LOC101249343), transcript variant X2
sly-miR156e-5p	101251286	XM_010322716.2	mRNA	PREDICTED: Solanum lycopersicum teosinte glume architecture 1 (LOC101251286), transcript variant X4
sly-miR396a-5p	101259468	XM_004245368.3	mRNA	PREDICTED: Solanum lycopersicum protein DDB_G0276689 (LOC101259468), transcript variant X2
sly-miR156b	101251286	XM_010322715.2	mRNA	PREDICTED: Solanum lycopersicum teosinte glume architecture 1 (LOC101251286), transcript variant X1
sly-miR156c	101247064	XM_004229663.3	mRNA	PREDICTED: Solanum lycopersicum uncharacterized LOC101247064 (LOC101247064)
sly-miR156e-5p	101255950	XM_004232759.3	mRNA	PREDICTED: Solanum lycopersicum calmodulin-binding protein 60 B-like (LOC101255950)
sly-miR1918	101245616	XM_004250879.3	mRNA	PREDICTED: Solanum lycopersicum phospholipase A1-Igamma3, chloroplastic (LOC101245616)
sly-miR156c	101251286	XM_010322715.2	mRNA	PREDICTED: Solanum lycopersicum teosinte glume architecture 1 (LOC101251286), transcript variant X1
sly-miR396a-5p	101253101	XM_004243421.3	mRNA	PREDICTED: Solanum lycopersicum glutamate receptor 3.1 (LOC101253101), transcript variant X1
sly-miR156c	101253448	XM_019212258.1	mRNA	PREDICTED: Solanum lycopersicum cationic amino acid transporter 1 (LOC101253448), transcript variant X3
sly-miR6024	101252874	XM_010322406.2	mRNA	PREDICTED: Solanum lycopersicum probable aquaporin NIP-type (LOC101252874), transcript variant X1
sly-miR156a	101266411	XM_010321302.2	mRNA	PREDICTED: Solanum lycopersicum probable lysine-specific demethylase ELF6 (LOC101266411)
sly-miR156e-5p	101245642	XM_004237646.3	mRNA	PREDICTED: Solanum lycopersicum squamosa promoter-binding-like protein 3 (LOC101245642)
sly-miR5303	101252125	XM_019216169.1	mRNA	PREDICTED: Solanum lycopersicum uncharacterized LOC101252125 (LOC101252125), transcript variant X3
sly-miR482c	101264270	XM_004231629.3	mRNA	PREDICTED: Solanum lycopersicum TMV resistance protein N-like (LOC101264270)
sly-miR396a-5p	104647560	XM_019214753.1	mRNA	PREDICTED: Solanum lycopersicum agamous-like MADS-box protein AGL97 (LOC104647560)
sly-miR6024	101260001	XM_019211150.1	mRNA	PREDICTED: Solanum lycopersicum putative late blight resistance protein homolog R1B-16 (LOC101260001), transcript variant X2
sly-miR156e-5p	101251286	XM_004239191.3	mRNA	PREDICTED: Solanum lycopersicum teosinte glume architecture 1 (LOC101251286), transcript variant X5
sly-miR9470-3p	101266387	XM_004250666.3	mRNA	PREDICTED: Solanum lycopersicum ethylene-responsive transcription factor ERF021 (LOC101266387)
sly-miR6022	101247953	XM_004228576.3	mRNA	PREDICTED: Solanum lycopersicum receptor-like protein 12 (LOC101247953)
sly-miR396a-3p	109118690	XM_019215230.1	mRNA	PREDICTED: Solanum lycopersicum uncharacterized LOC109118690 (LOC109118690), transcript variant X1
sly-miR156e-5p	104649496	XM_010328929.2	mRNA	PREDICTED: Solanum lycopersicum equilibrative nucleotide transporter 3-like (LOC104649496), transcript variant X1
sly-miR482c	101252874	XM_010322406.2	mRNA	PREDICTED: Solanum lycopersicum probable aquaporin NIP-type (LOC101252874), transcript variant X1
sly-miR397	101254231	XM_004246821.2	mRNA	PREDICTED: Solanum lycopersicum laccase-17 (LOC101254231)
sly-miR169d	101264750	XM_004228468.3	mRNA	PREDICTED: Solanum lycopersicum nuclear transcription factor Y subunit A-1 (LOC101264750)
sly-miR5303	104644457	XM_010314256.2	mRNA	PREDICTED: Solanum lycopersicum F-box protein At5g65850-like (LOC104644457), transcript variant X4
sly-miR164b-5p	101261222	XM_004237208.3	mRNA	PREDICTED: Solanum lycopersicum protein LSM12 homolog (LOC101261222)
sly-miR396b	101258918	XM_010318599.2	mRNA	PREDICTED: Solanum lycopersicum uncharacterized LOC101258918 (LOC101258918), transcript variant X1
sly-miR6022	101247650	XM_019213708.1	mRNA	PREDICTED: Solanum lycopersicum disease resistance protein Cf-9-like (LOC101247650), transcript variant X2
sly-miR169c	101247294	XM_004251633.3	mRNA	PREDICTED: Solanum lycopersicum nuclear transcription factor Y subunit A-7-like (LOC101247294), transcript variant X1
sly-miR9470-3p	101249506	XM_010313862.2	mRNA	PREDICTED: Solanum lycopersicum bifunctional protein FolD 2 (LOC101249506), transcript variant X3
sly-miR6024	101266073	XM_004248126.3	mRNA	PREDICTED: Solanum lycopersicum putative late blight resistance protein homolog R1B-12 (LOC101266073), transcript variant X1
sly-miR9470-3p	101261662	XM_010328943.2	mRNA	PREDICTED: Solanum lycopersicum protein LHY (LOC101261662), transcript variant X2
sly-miR6024	101253178	XM_010320912.2	mRNA	PREDICTED: Solanum lycopersicum putative late blight resistance protein homolog R1B-16 (LOC101253178)
sly-miR169c	101259926	XM_004235526.3	mRNA	PREDICTED: Solanum lycopersicum nuclear transcription factor Y subunit A-3 (LOC101259926), transcript variant X2
sly-miR164b-5p	101263350	XM_010327151.2	mRNA	PREDICTED: Solanum lycopersicum uncharacterized LOC101263350 (LOC101263350), transcript variant X4
sly-miR164b-5p	101258224	XM_004250920.3	mRNA	PREDICTED: Solanum lycopersicum UDP-glucuronic acid decarboxylase 5 (LOC101258224)
sly-miR5303	101259484	XM_019215625.1	mRNA	PREDICTED: Solanum lycopersicum potassium transporter 5-like (LOC101259484)
sly-miR397	101249792	XM_004233925.3	mRNA	PREDICTED: Solanum lycopersicum laccase-11 (LOC101249792)
sly-miR156c	101251286	XM_010322716.2	mRNA	PREDICTED: Solanum lycopersicum teosinte glume architecture 1 (LOC101251286), transcript variant X4
sly-miR396b	101244531	NM_001329878.1	mRNA	Solanum lycopersicum peptidyl-prolyl cis-trans isomerase CYP40-like (LOC101244531)
sly-miR5303	543650	XM_010314892.2	mRNA	PREDICTED: Solanum lycopersicum aldehyde oxidase (AO1), transcript variant X1
sly-miR5303	101262845	XM_004246495.3	mRNA	PREDICTED: Solanum lycopersicum uncharacterized LOC101262845 (LOC101262845)
sly-miR482d-3p	101246773	XM_004231245.3	mRNA	PREDICTED: Solanum lycopersicum TMV resistance protein N-like (LOC101246773)
sly-miR5303	101260564	XM_019215466.1	mRNA	PREDICTED: Solanum lycopersicum uncharacterized LOC101260564 (LOC101260564), transcript variant X1
sly-miR169c	101247462	XM_010326192.2	mRNA	PREDICTED: Solanum lycopersicum nuclear transcription factor Y subunit A-9 (LOC101247462), transcript variant X2
sly-miR5303	101247682	XM_019210845.1	mRNA	PREDICTED: Solanum lycopersicum zinc finger protein 4 (LOC101247682), transcript variant X2
sly-miR156d-5p	101268879	XM_010324883.2	mRNA	PREDICTED: Solanum lycopersicum 26S proteasome non-ATPase regulatory subunit 9 (LOC101268879), transcript variant X1
sly-miR164a-5p	101263350	XM_010327149.2	mRNA	PREDICTED: Solanum lycopersicum uncharacterized LOC101263350 (LOC101263350), transcript variant X3
sly-miR156e-5p	101261948	XM_010318231.2	mRNA	PREDICTED: Solanum lycopersicum 65-kDa microtubule-associated protein 6-like (LOC101261948), transcript variant X2
sly-miR6024	101253784	XM_010322337.2	mRNA	PREDICTED: Solanum lycopersicum TMV resistance protein N-like (LOC101253784)
sly-miR5303	101246835	XM_004242559.3	mRNA	PREDICTED: Solanum lycopersicum UPF0057 membrane protein At4g30660-like (LOC101246835)
sly-miR397	101251481	XM_004241042.3	mRNA	PREDICTED: Solanum lycopersicum laccase-12-like (LOC101251481)
sly-miR6022	101247650	XM_010317618.2	mRNA	PREDICTED: Solanum lycopersicum disease resistance protein Cf-9-like (LOC101247650), transcript variant X3
sly-miR156e-5p	101257198	XM_010327181.2	mRNA	PREDICTED: Solanum lycopersicum uncharacterized LOC101257198 (LOC101257198), transcript variant X1
sly-miR156d-5p	101250391	XM_010320401.2	mRNA	PREDICTED: Solanum lycopersicum ABC transporter C family member 13 (LOC101250391), transcript variant X2
sly-miR5303	101247294	XM_010315462.2	mRNA	PREDICTED: Solanum lycopersicum nuclear transcription factor Y subunit A-7-like (LOC101247294), transcript variant X5
sly-miR1917	101248526	XM_004248693.3	mRNA	PREDICTED: Solanum lycopersicum sodium channel modifier 1 (LOC101248526), transcript variant X2
sly-miR482b	101252874	XM_010322406.2	mRNA	PREDICTED: Solanum lycopersicum probable aquaporin NIP-type (LOC101252874), transcript variant X1
sly-miR169c	101247294	XM_010315462.2	mRNA	PREDICTED: Solanum lycopersicum nuclear transcription factor Y subunit A-7-like (LOC101247294), transcript variant X5
sly-miR169b	101255224	XM_004245120.3	mRNA	PREDICTED: Solanum lycopersicum probable glycosyltransferase At3g07620 (LOC101255224)
sly-miR169c	101247462	XM_019213218.1	mRNA	PREDICTED: Solanum lycopersicum nuclear transcription factor Y subunit A-9 (LOC101247462), transcript variant X3
sly-miR5303	101255100	XM_010323177.2	mRNA	PREDICTED: Solanum lycopersicum BTB/POZ domain-containing protein DOT3 (LOC101255100), transcript variant X1
sly-miR396b	101260915	XM_010316304.2	mRNA	PREDICTED: Solanum lycopersicum scopoletin glucosyltransferase-like (LOC101260915), transcript variant X2
sly-miR156e-5p	101246055	XM_010322702.2	mRNA	PREDICTED: Solanum lycopersicum squamosa promoter-binding-like protein 12 (LOC101246055), transcript variant X1
sly-miR396b	101260915	XM_004252708.3	mRNA	PREDICTED: Solanum lycopersicum scopoletin glucosyltransferase-like (LOC101260915), transcript variant X3
sly-miR5303	101244869	XM_004238680.3	mRNA	PREDICTED: Solanum lycopersicum serine carboxypeptidase-like 50 (LOC101244869)
sly-miR5303	101258263	XM_004239724.3	mRNA	PREDICTED: Solanum lycopersicum protein TIC 20-I, chloroplastic-like (LOC101258263)
sly-miR396b	100135704	NM_001246974.2	mRNA	Solanum lycopersicum DNA cytosine 5-methyltransferase-like (DRM5)
sly-miR156e-5p	101246669	NM_001320680.1	mRNA	Solanum lycopersicum squamosa promoter binding-like protein 3 (SBP3)
sly-miR169b	101259926	XM_010320187.2	mRNA	PREDICTED: Solanum lycopersicum nuclear transcription factor Y subunit A-3 (LOC101259926), transcript variant X1
sly-miR1918	104646550	XM_010320278.2	mRNA	PREDICTED: Solanum lycopersicum LOB domain-containing protein 1-like (LOC104646550)
sly-miR5303	101245622	XM_004251339.3	mRNA	PREDICTED: Solanum lycopersicum germin-like protein 9-3 (LOC101245622)
sly-miR390a-5p	101268564	XM_004237174.1	mRNA	PREDICTED: Solanum lycopersicum probable LRR receptor-like serine/threonine-protein kinase RPK1 (LOC101268564)
sly-miR169d	101259926	XM_010320187.2	mRNA	PREDICTED: Solanum lycopersicum nuclear transcription factor Y subunit A-3 (LOC101259926), transcript variant X1
sly-miR396b	101252606	NM_001324110.1	mRNA	Solanum lycopersicum uncharacterized LOC101252606 (LOC101252606)
sly-miR156e-5p	101246055	XM_010322703.2	mRNA	PREDICTED: Solanum lycopersicum squamosa promoter-binding-like protein 12 (LOC101246055), transcript variant X3
sly-miR6024	101263874	XM_004251182.3	mRNA	PREDICTED: Solanum lycopersicum putative disease resistance RPP13-like protein 1 (LOC101263874)
sly-miR5303	101249191	XM_004244552.3	mRNA	PREDICTED: Solanum lycopersicum protein DETOXIFICATION 49-like (LOC101249191)
sly-miR390a-5p	101263751	XM_004247058.3	mRNA	PREDICTED: Solanum lycopersicum putative kinase-like protein TMKL1 (LOC101263751)
sly-miR5302b-3p	101263107	XM_004237433.3	mRNA	PREDICTED: Solanum lycopersicum ubiquitin carboxyl-terminal hydrolase 27 (LOC101263107)
sly-miR156a	101250753	XM_004249116.3	mRNA	PREDICTED: Solanum lycopersicum squamosa promoter-binding-like protein 9 (LOC101250753)
sly-miR396b	101252606	XM_010326059.2	mRNA	PREDICTED: Solanum lycopersicum uncharacterized LOC101252606 (LOC101252606), transcript variant X2
sly-miR5303	101251954	XM_004234044.1	mRNA	PREDICTED: Solanum lycopersicum uncharacterized LOC101251954 (LOC101251954)
sly-miR156e-5p	101257198	XM_004245727.3	mRNA	PREDICTED: Solanum lycopersicum uncharacterized LOC101257198 (LOC101257198), transcript variant X6
sly-miR5303	101256353	XM_010315431.2	mRNA	PREDICTED: Solanum lycopersicum probable glycosyltransferase At3g07620 (LOC101256353), transcript variant X2
sly-miR5303	101265545	XM_004239661.2	mRNA	PREDICTED: Solanum lycopersicum NAC domain-containing protein 78 (LOC101265545)
sly-miR5303	101255967	XM_010315888.1	mRNA	PREDICTED: Solanum lycopersicum probable DNA double-strand break repair Rad50 ATPase (LOC101255967), transcript variant X4
sly-miR482c	101254234	XM_010322928.2	mRNA	PREDICTED: Solanum lycopersicum probable disease resistance protein At1g61300 (LOC101254234)
sly-miR1918	101248127	XM_019215736.1	mRNA	PREDICTED: Solanum lycopersicum mediator of RNA polymerase II transcription subunit 19a (LOC101248127), transcript variant X3
sly-miR9470-3p	101265501	XM_004250248.3	mRNA	PREDICTED: Solanum lycopersicum uncharacterized LOC101265501 (LOC101265501)
sly-miR156c	101248216	XM_004243319.2	mRNA	PREDICTED: Solanum lycopersicum squamosa promoter-binding-like protein 3 (LOC101248216)
sly-miR396b	101245181	XM_004243148.3	mRNA	PREDICTED: Solanum lycopersicum probable glutathione S-transferase (LOC101245181)
sly-miR169d	101247294	XM_004251633.3	mRNA	PREDICTED: Solanum lycopersicum nuclear transcription factor Y subunit A-7-like (LOC101247294), transcript variant X1
sly-miR5303	101268235	XM_019211453.1	mRNA	PREDICTED: Solanum lycopersicum (+)-neomenthol dehydrogenase-like (LOC101268235), transcript variant X1
sly-miR169d	101247462	NM_001329119.1	mRNA	Solanum lycopersicum nuclear transcription factor Y subunit A-9 (LOC101247462)
sly-miR482d-3p	101266190	XM_004233766.3	mRNA	PREDICTED: Solanum lycopersicum equilibrative nucleotide transporter 3-like (LOC101266190)
sly-miR156c	101245642	XM_004237646.3	mRNA	PREDICTED: Solanum lycopersicum squamosa promoter-binding-like protein 3 (LOC101245642)
sly-miR396b	101258918	XM_010318600.2	mRNA	PREDICTED: Solanum lycopersicum uncharacterized LOC101258918 (LOC101258918), transcript variant X3
sly-miR5303	101258222	XM_019212227.1	mRNA	PREDICTED: Solanum lycopersicum putative cysteine-rich receptor-like protein kinase 43 (LOC101258222), transcript variant X2
sly-miR396a-5p	101259468	XM_010326859.2	mRNA	PREDICTED: Solanum lycopersicum protein DDB_G0276689 (LOC101259468), transcript variant X3
sly-miR397	101248855	XM_004235160.3	mRNA	PREDICTED: Solanum lycopersicum translocase of chloroplast 34 (LOC101248855)
sly-miR156c	101264297	XM_004252201.3	mRNA	PREDICTED: Solanum lycopersicum squamosa promoter-binding-like protein 6 (LOC101264297)
sly-miR5303	101265955	XM_004228875.2	mRNA	PREDICTED: Solanum lycopersicum G-type lectin S-receptor-like serine/threonine-protein kinase LECRK2 (LOC101265955)
sly-miR396a-5p	101252434	XM_004247540.3	mRNA	PREDICTED: Solanum lycopersicum protein NETWORKED 1A (LOC101252434)
sly-miR156b	101246055	XM_010322704.2	mRNA	PREDICTED: Solanum lycopersicum squamosa promoter-binding-like protein 12 (LOC101246055), transcript variant X2
sly-miR397	101262915	XM_010322559.2	mRNA	PREDICTED: Solanum lycopersicum pentatricopeptide repeat-containing protein At1g80150, mitochondrial (LOC101262915)
sly-miR5303	101256574	XM_019211509.1	mRNA	PREDICTED: Solanum lycopersicum xyloglucan endotransglucosylase/hydrolase 2 (LOC101256574), transcript variant X2
sly-miR156d-5p	101246055	XM_010322703.2	mRNA	PREDICTED: Solanum lycopersicum squamosa promoter-binding-like protein 12 (LOC101246055), transcript variant X3
sly-miR156c	101256245	NM_001319308.1	mRNA	Solanum lycopersicum SQUAMOSA promoter binding protein-like (LeSPL-CNR)
sly-miR5303	101267051	XM_010327652.2	mRNA	PREDICTED: Solanum lycopersicum ELKS/Rab6-interacting/CAST family member 1-like (LOC101267051)
sly-miR156b	101262615	XM_004238983.3	mRNA	PREDICTED: Solanum lycopersicum squamosa promoter-binding-like protein 6 (LOC101262615)
sly-miR169c	101246742	XM_004245011.3	mRNA	PREDICTED: Solanum lycopersicum nuclear transcription factor Y subunit A-8 (LOC101246742), transcript variant X1
sly-miR156d-5p	101250753	XM_004249116.3	mRNA	PREDICTED: Solanum lycopersicum squamosa promoter-binding-like protein 9 (LOC101250753)
sly-miR156a	101246055	XM_010322707.2	mRNA	PREDICTED: Solanum lycopersicum squamosa promoter-binding-like protein 12 (LOC101246055), transcript variant X7
sly-miR9470-3p	101247277	XM_004231909.2	mRNA	PREDICTED: Solanum lycopersicum cysteine desulfurase, mitochondrial (LOC101247277)
sly-miR5303	101243867	XM_004252296.3	mRNA	PREDICTED: Solanum lycopersicum hydroxyphenylpyruvate reductase-like (LOC101243867)
sly-miR397	101258179	XM_004246308.3	mRNA	PREDICTED: Solanum lycopersicum laccase-17-like (LOC101258179)
sly-miR5303	101260809	XM_004253486.2	mRNA	PREDICTED: Solanum lycopersicum kirola-like (LOC101260809)
sly-miR6024	101266073	XM_019216094.1	mRNA	PREDICTED: Solanum lycopersicum putative late blight resistance protein homolog R1B-12 (LOC101266073), transcript variant X3
sly-miR319c-3p	100037511	XM_010326657.2	mRNA	PREDICTED: Solanum lycopersicum GAMyb-like1 (LOC100037511), transcript variant X3
sly-miR6024	101266373	XM_010329273.2	mRNA	PREDICTED: Solanum lycopersicum putative late blight resistance protein homolog R1A-10 (LOC101266373)
sly-miR156c	101253448	XM_019212257.1	mRNA	PREDICTED: Solanum lycopersicum cationic amino acid transporter 1 (LOC101253448), transcript variant X2
sly-miR5303	101266367	XM_019211092.1	mRNA	PREDICTED: Solanum lycopersicum F-box protein At5g49610-like (LOC101266367), transcript variant X2
sly-miR156c	101262615	XM_004238983.3	mRNA	PREDICTED: Solanum lycopersicum squamosa promoter-binding-like protein 6 (LOC101262615)
sly-miR156a	101246055	XM_010322703.2	mRNA	PREDICTED: Solanum lycopersicum squamosa promoter-binding-like protein 12 (LOC101246055), transcript variant X3
sly-miR156e-5p	101246055	XM_010322707.2	mRNA	PREDICTED: Solanum lycopersicum squamosa promoter-binding-like protein 12 (LOC101246055), transcript variant X7
sly-miR482b	101268158	XM_019210877.1	mRNA	PREDICTED: Solanum lycopersicum putative late blight resistance protein homolog R1B-16 (LOC101268158)
sly-miR5303	101258121	XM_004232684.3	mRNA	PREDICTED: Solanum lycopersicum vacuolar protein sorting-associated protein 28 homolog 2 (LOC101258121), transcript variant X4
sly-miR164a-5p	101263350	XM_004229717.3	mRNA	PREDICTED: Solanum lycopersicum uncharacterized LOC101263350 (LOC101263350), transcript variant X1
sly-miR156a	101268335	XM_010314165.2	mRNA	PREDICTED: Solanum lycopersicum serine/threonine-protein kinase ATG1t (LOC101268335), transcript variant X4
sly-miR169b	101265980	XM_019216175.1	mRNA	PREDICTED: Solanum lycopersicum nuclear transcription factor Y subunit A-10-like (LOC101265980), transcript variant X3
sly-miR482b	101263305	XM_004236790.2	mRNA	PREDICTED: Solanum lycopersicum disease resistance protein RPP13-like (LOC101263305)
sly-miR6024	101244741	XM_010315139.2	mRNA	PREDICTED: Solanum lycopersicum putative disease resistance RPP13-like protein 1 (LOC101244741)
sly-miR5303	101243919	XM_004246087.3	mRNA	PREDICTED: Solanum lycopersicum growth-regulating factor 9-like (LOC101243919)
sly-miR9470-3p	101261662	XM_004248368.3	mRNA	PREDICTED: Solanum lycopersicum protein LHY (LOC101261662), transcript variant X1
sly-miR5303	101249527	XM_004251558.3	mRNA	PREDICTED: Solanum lycopersicum protein CfxQ homolog (LOC101249527)
sly-miR6024	101266929	XM_019213371.1	mRNA	PREDICTED: Solanum lycopersicum putative late blight resistance protein homolog R1A-10 (LOC101266929)
sly-miR5303	101255193	XM_004237410.3	mRNA	PREDICTED: Solanum lycopersicum F-box/kelch-repeat protein SKIP6-like (LOC101255193)
sly-miR6022	101246079	XM_004228569.3	mRNA	PREDICTED: Solanum lycopersicum receptor-like protein 12 (LOC101246079)
sly-miR9478-3p	101254479	XM_004237946.3	mRNA	PREDICTED: Solanum lycopersicum uncharacterized protein At1g04910 (LOC101254479)
sly-miR396b	101249231	XM_004250361.3	mRNA	PREDICTED: Solanum lycopersicum putative late blight resistance protein homolog R1B-16 (LOC101249231)
sly-miR5303	101256353	XM_019211627.1	mRNA	PREDICTED: Solanum lycopersicum probable glycosyltransferase At3g07620 (LOC101256353), transcript variant X1
sly-miR5303	101265417	XM_019211310.1	mRNA	PREDICTED: Solanum lycopersicum probable leucine-rich repeat receptor-like protein kinase At5g63930 (LOC101265417)
sly-miR5303	101253801	XM_019214995.1	mRNA	PREDICTED: Solanum lycopersicum protein DETOXIFICATION 16-like (LOC101253801), transcript variant X1
sly-miR156b	101248216	XM_004243319.2	mRNA	PREDICTED: Solanum lycopersicum squamosa promoter-binding-like protein 3 (LOC101248216)
sly-miR156a	101246055	XM_010322702.2	mRNA	PREDICTED: Solanum lycopersicum squamosa promoter-binding-like protein 12 (LOC101246055), transcript variant X1
sly-miR482b	101266052	XM_010326527.2	mRNA	PREDICTED: Solanum lycopersicum pentatricopeptide repeat-containing protein At1g77405 (LOC101266052), transcript variant X2
sly-miR5303	101263144	XM_010318266.2	mRNA	PREDICTED: Solanum lycopersicum E3 ubiquitin-protein ligase KEG (LOC101263144), transcript variant X1
sly-miR156e-5p	101251286	XM_010322715.2	mRNA	PREDICTED: Solanum lycopersicum teosinte glume architecture 1 (LOC101251286), transcript variant X1
sly-miR9472-3p	101259193	NM_001279341.2	mRNA	Solanum lycopersicum adenylate isopentenyltransferase 5, chloroplastic-like (IPT2)
sly-miR164a-5p	101261342	XM_019214651.1	mRNA	PREDICTED: Solanum lycopersicum NAC domain-containing protein 21/22 (LOC101261342), transcript variant X2
sly-miR169b	101265980	XM_019216174.1	mRNA	PREDICTED: Solanum lycopersicum nuclear transcription factor Y subunit A-10-like (LOC101265980), transcript variant X1
sly-miR156e-5p	101246055	XM_004239169.3	mRNA	PREDICTED: Solanum lycopersicum squamosa promoter-binding-like protein 12 (LOC101246055), transcript variant X6
sly-miR156e-5p	101256544	XM_019211037.1	mRNA	PREDICTED: Solanum lycopersicum dephospho-CoA kinase (LOC101256544), transcript variant X3
sly-miR390b-5p	101250736	XM_004229759.3	mRNA	PREDICTED: Solanum lycopersicum probable LRR receptor-like serine/threonine-protein kinase At1g34110 (LOC101250736)
sly-miR482b	101259993	XM_010317402.2	mRNA	PREDICTED: Solanum lycopersicum probable disease resistance protein At4g27220 (LOC101259993), transcript variant X5
sly-miR482d-3p	101263609	XM_010322475.2	mRNA	PREDICTED: Solanum lycopersicum putative late blight resistance protein homolog R1A-10 (LOC101263609)
sly-miR156d-5p	101246055	XM_010322706.2	mRNA	PREDICTED: Solanum lycopersicum squamosa promoter-binding-like protein 12 (LOC101246055), transcript variant X5
sly-miR482a	101264881	XM_010314289.2	mRNA	PREDICTED: Solanum lycopersicum probable pectate lyase 13 (LOC101264881), transcript variant X2
sly-miR169c	101259926	XM_010320187.2	mRNA	PREDICTED: Solanum lycopersicum nuclear transcription factor Y subunit A-3 (LOC101259926), transcript variant X1
sly-miR482b	101247810	XM_019213285.1	mRNA	PREDICTED: Solanum lycopersicum disease resistance protein RPP13-like (LOC101247810)
sly-miR156a	101268335	XM_004249838.3	mRNA	PREDICTED: Solanum lycopersicum serine/threonine-protein kinase ATG1t (LOC101268335), transcript variant X1
sly-miR5303	101260564	XM_004246487.3	mRNA	PREDICTED: Solanum lycopersicum uncharacterized LOC101260564 (LOC101260564), transcript variant X2
sly-miR169d	101246742	XM_010326711.2	mRNA	PREDICTED: Solanum lycopersicum nuclear transcription factor Y subunit A-8 (LOC101246742), transcript variant X2
sly-miR156b	101268335	XM_004249838.3	mRNA	PREDICTED: Solanum lycopersicum serine/threonine-protein kinase ATG1t (LOC101268335), transcript variant X1
sly-miR156c	101268335	XM_010314165.2	mRNA	PREDICTED: Solanum lycopersicum serine/threonine-protein kinase ATG1t (LOC101268335), transcript variant X4
sly-miR5303	104644457	XM_010314258.2	mRNA	PREDICTED: Solanum lycopersicum F-box protein At5g65850-like (LOC104644457), transcript variant X6
sly-miR5303	104644505	XM_010314538.2	mRNA	PREDICTED: Solanum lycopersicum uncharacterized LOC104644505 (LOC104644505), transcript variant X1
sly-miR5303	101257156	XM_004252930.3	mRNA	PREDICTED: Solanum lycopersicum crocetin glucosyltransferase, chloroplastic-like (LOC101257156)
sly-miR6024	101252606	NM_001324110.1	mRNA	Solanum lycopersicum uncharacterized LOC101252606 (LOC101252606)
sly-miR5303	101268673	XM_004236983.3	mRNA	PREDICTED: Solanum lycopersicum kirola-like (LOC101268673)
sly-miR6024	101260001	XM_010314205.2	mRNA	PREDICTED: Solanum lycopersicum putative late blight resistance protein homolog R1B-16 (LOC101260001), transcript variant X1
sly-miR5303	101246827	XM_004240294.3	mRNA	PREDICTED: Solanum lycopersicum pentatricopeptide repeat-containing protein At4g02820, mitochondrial (LOC101246827)
sly-miR6024	101260313	XM_004234654.3	mRNA	PREDICTED: Solanum lycopersicum uncharacterized LOC101260313 (LOC101260313), transcript variant X1
sly-miR390b-5p	101245637	XM_010320887.2	mRNA	PREDICTED: Solanum lycopersicum leucine-rich repeat receptor-like tyrosine-protein kinase PXC3 (LOC101245637), transcript variant X2
sly-miR156b	101246055	XM_010322702.2	mRNA	PREDICTED: Solanum lycopersicum squamosa promoter-binding-like protein 12 (LOC101246055), transcript variant X1
sly-miR6024	101263647	XM_004231069.3	mRNA	PREDICTED: Solanum lycopersicum putative late blight resistance protein homolog R1A-10 (LOC101263647)
sly-miR482c	101244161	XM_019211304.1	mRNA	PREDICTED: Solanum lycopersicum putative late blight resistance protein homolog R1B-16 (LOC101244161), transcript variant X1
sly-miR5303	543650	XM_010314895.2	mRNA	PREDICTED: Solanum lycopersicum aldehyde oxidase (AO1), transcript variant X3
sly-miR5303	101260874	XM_010328885.2	mRNA	PREDICTED: Solanum lycopersicum cell differentiation protein RCD1 homolog (LOC101260874), transcript variant X10
sly-miR156c	101268335	XM_004249838.3	mRNA	PREDICTED: Solanum lycopersicum serine/threonine-protein kinase ATG1t (LOC101268335), transcript variant X1
sly-miR5303	101268235	XM_019211455.1	mRNA	PREDICTED: Solanum lycopersicum (+)-neomenthol dehydrogenase-like (LOC101268235), transcript variant X2
sly-miR164a-5p	101263350	XM_010327151.2	mRNA	PREDICTED: Solanum lycopersicum uncharacterized LOC101263350 (LOC101263350), transcript variant X4
sly-miR5303	101256353	XM_010315433.1	mRNA	PREDICTED: Solanum lycopersicum probable glycosyltransferase At3g07620 (LOC101256353), transcript variant X5
sly-miR396b	101252606	XM_004244173.3	mRNA	PREDICTED: Solanum lycopersicum uncharacterized LOC101252606 (LOC101252606), transcript variant X1
sly-miR5303	101255342	XM_010329129.2	mRNA	PREDICTED: Solanum lycopersicum protein SHI RELATED SEQUENCE 3-like (LOC101255342), transcript variant X1
sly-miR156a	101247064	XM_004229663.3	mRNA	PREDICTED: Solanum lycopersicum uncharacterized LOC101247064 (LOC101247064)
sly-miR6022	101252514	XM_004228591.3	mRNA	PREDICTED: Solanum lycopersicum receptor like protein 30 (LOC101252514)
sly-miR164a-5p	101263350	XM_010327147.2	mRNA	PREDICTED: Solanum lycopersicum uncharacterized LOC101263350 (LOC101263350), transcript variant X2
sly-miR164b-5p	101263350	XM_010327147.2	mRNA	PREDICTED: Solanum lycopersicum uncharacterized LOC101263350 (LOC101263350), transcript variant X2
sly-miR5303	101256353	XM_019211628.1	mRNA	PREDICTED: Solanum lycopersicum probable glycosyltransferase At3g07620 (LOC101256353), transcript variant X3
sly-miR164a-5p	101255705	XM_004241538.3	mRNA	PREDICTED: Solanum lycopersicum NAC domain-containing protein 100-like (LOC101255705)
sly-miR390b-5p	101263751	XM_004247058.3	mRNA	PREDICTED: Solanum lycopersicum putative kinase-like protein TMKL1 (LOC101263751)
sly-miR5303	101268292	XM_010325485.2	mRNA	PREDICTED: Solanum lycopersicum BTB/POZ domain-containing protein At3g22104 (LOC101268292), transcript variant X1
sly-miR169d	101259926	XM_004235526.3	mRNA	PREDICTED: Solanum lycopersicum nuclear transcription factor Y subunit A-3 (LOC101259926), transcript variant X2
sly-miR169b	101257995	XM_004228610.3	mRNA	PREDICTED: Solanum lycopersicum nuclear transcription factor Y subunit A-10 (LOC101257995)
sly-miR5303	101255967	XM_010315891.2	mRNA	PREDICTED: Solanum lycopersicum probable DNA double-strand break repair Rad50 ATPase (LOC101255967), transcript variant X8
sly-miR156e-5p	101250753	XM_004249116.3	mRNA	PREDICTED: Solanum lycopersicum squamosa promoter-binding-like protein 9 (LOC101250753)
sly-miR390a-5p	101246069	XM_010325322.2	mRNA	PREDICTED: Solanum lycopersicum leucine-rich repeat receptor-like serine/threonine-protein kinase At1g17230 (LOC101246069), transcript variant X2
sly-miR156b	101246055	XM_010322707.2	mRNA	PREDICTED: Solanum lycopersicum squamosa promoter-binding-like protein 12 (LOC101246055), transcript variant X7
sly-miR156e-5p	101261948	XM_010318233.2	mRNA	PREDICTED: Solanum lycopersicum 65-kDa microtubule-associated protein 6-like (LOC101261948), transcript variant X3
sly-miR396b	101257617	XM_004231565.2	mRNA	PREDICTED: Solanum lycopersicum uncharacterized LOC101257617 (LOC101257617), transcript variant X1
sly-miR156c	101251286	XM_004239191.3	mRNA	PREDICTED: Solanum lycopersicum teosinte glume architecture 1 (LOC101251286), transcript variant X5
sly-miR482a	101262730	XM_004241902.3	mRNA	PREDICTED: Solanum lycopersicum putative late blight resistance protein homolog R1B-23 (LOC101262730), transcript variant X2
sly-miR164b-5p	101263350	XM_004229717.3	mRNA	PREDICTED: Solanum lycopersicum uncharacterized LOC101263350 (LOC101263350), transcript variant X1
sly-miR164b-5p	101252831	XM_004249542.3	mRNA	PREDICTED: Solanum lycopersicum cactin (LOC101252831)
sly-miR156b	101268335	XM_019210970.1	mRNA	PREDICTED: Solanum lycopersicum serine/threonine-protein kinase ATG1t (LOC101268335), transcript variant X3
sly-miR5302b-3p	101258025	XM_010314580.2	mRNA	PREDICTED: Solanum lycopersicum uncharacterized LOC101258025 (LOC101258025), transcript variant X7
sly-miR396a-5p	101245462	XM_004240368.3	mRNA	PREDICTED: Solanum lycopersicum ubiquitin-activating enzyme E1 1 (LOC101245462), transcript variant X1
sly-miR390a-5p	101245637	XM_010320888.2	mRNA	PREDICTED: Solanum lycopersicum leucine-rich repeat receptor-like tyrosine-protein kinase PXC3 (LOC101245637), transcript variant X3
sly-miR156b	101261007	XM_004236023.2	mRNA	PREDICTED: Solanum lycopersicum squamosa promoter-binding-like protein (LOC101261007)
sly-miR156c	101246055	XM_010322707.2	mRNA	PREDICTED: Solanum lycopersicum squamosa promoter-binding-like protein 12 (LOC101246055), transcript variant X7
sly-miR5303	101259276	XM_010325954.2	mRNA	PREDICTED: Solanum lycopersicum probable 6-phosphogluconolactonase 2 (LOC101259276), transcript variant X1
sly-miR5303	101252125	XM_004248337.3	mRNA	PREDICTED: Solanum lycopersicum uncharacterized LOC101252125 (LOC101252125), transcript variant X2
sly-miR397	101263266	XM_004232372.3	mRNA	PREDICTED: Solanum lycopersicum laccase-11 (LOC101263266)
sly-miR482c	101255563	XM_010315680.2	mRNA	PREDICTED: Solanum lycopersicum putative late blight resistance protein homolog R1B-8 (LOC101255563)
sly-miR156d-5p	101251286	XM_010322716.2	mRNA	PREDICTED: Solanum lycopersicum teosinte glume architecture 1 (LOC101251286), transcript variant X4
sly-miR156e-5p	101251286	XM_019214096.1	mRNA	PREDICTED: Solanum lycopersicum teosinte glume architecture 1 (LOC101251286), transcript variant X3
sly-miR6024	101255420	NM_001331132.1	mRNA	Solanum lycopersicum tm-2 protein (tm-2)
sly-miR397	101253619	XM_019215525.1	mRNA	PREDICTED: Solanum lycopersicum laccase-17-like (LOC101253619), partial mRNA
sly-miR169d	101247294	XM_010315460.2	mRNA	PREDICTED: Solanum lycopersicum nuclear transcription factor Y subunit A-7-like (LOC101247294), transcript variant X3
sly-miR156d-5p	101264297	XM_004252201.3	mRNA	PREDICTED: Solanum lycopersicum squamosa promoter-binding-like protein 6 (LOC101264297)
sly-miR156c	101251286	XM_019214096.1	mRNA	PREDICTED: Solanum lycopersicum teosinte glume architecture 1 (LOC101251286), transcript variant X3
sly-miR169c	101247462	XM_019213207.1	mRNA	PREDICTED: Solanum lycopersicum nuclear transcription factor Y subunit A-9 (LOC101247462), transcript variant X1
sly-miR5303	101266052	XM_010326526.2	mRNA	PREDICTED: Solanum lycopersicum pentatricopeptide repeat-containing protein At1g77405 (LOC101266052), transcript variant X1
sly-miR156b	101266411	XM_010321302.2	mRNA	PREDICTED: Solanum lycopersicum probable lysine-specific demethylase ELF6 (LOC101266411)
sly-miR169d	101255224	XM_004245120.3	mRNA	PREDICTED: Solanum lycopersicum probable glycosyltransferase At3g07620 (LOC101255224)
sly-miR396b	101255185	XM_010320399.2	mRNA	PREDICTED: Solanum lycopersicum heat shock 70 kDa protein 5 (LOC101255185)
sly-miR156e-5p	101248216	XM_004243319.2	mRNA	PREDICTED: Solanum lycopersicum squamosa promoter-binding-like protein 3 (LOC101248216)
sly-miR6024	101243759	XM_019211208.1	mRNA	PREDICTED: Solanum lycopersicum putative late blight resistance protein homolog R1A-3 (LOC101243759), transcript variant X1
sly-miR169e-3p	101251361	XM_010319573.2	mRNA	PREDICTED: Solanum lycopersicum small G protein signaling modulator 1-like (LOC101251361), transcript variant X2
sly-miR5303	101268235	XM_019211456.1	mRNA	PREDICTED: Solanum lycopersicum (+)-neomenthol dehydrogenase-like (LOC101268235), transcript variant X3
sly-miR1917	101246564	XM_004229581.3	mRNA	PREDICTED: Solanum lycopersicum uncharacterized LOC101246564 (LOC101246564)
sly-miR156d-5p	101268879	XM_004242547.2	mRNA	PREDICTED: Solanum lycopersicum 26S proteasome non-ATPase regulatory subunit 9 (LOC101268879), transcript variant X2
sly-miR9472-3p	101261708	XM_004238736.3	mRNA	PREDICTED: Solanum lycopersicum 40S ribosomal protein S9-2 (LOC101261708)
sly-miR169c	101247462	NM_001329119.1	mRNA	Solanum lycopersicum nuclear transcription factor Y subunit A-9 (LOC101247462)
sly-miR6024	101260277	XM_010328774.2	mRNA	PREDICTED: Solanum lycopersicum putative late blight resistance protein homolog R1B-14 (LOC101260277)
sly-miR156c	101268335	XM_019210970.1	mRNA	PREDICTED: Solanum lycopersicum serine/threonine-protein kinase ATG1t (LOC101268335), transcript variant X3
sly-miR5303	101252125	XM_004248336.3	mRNA	PREDICTED: Solanum lycopersicum uncharacterized LOC101252125 (LOC101252125), transcript variant X1
sly-miR164a-5p	101258224	XM_004250920.3	mRNA	PREDICTED: Solanum lycopersicum UDP-glucuronic acid decarboxylase 5 (LOC101258224)
sly-miR390b-5p	101245637	XM_004236567.3	mRNA	PREDICTED: Solanum lycopersicum leucine-rich repeat receptor-like tyrosine-protein kinase PXC3 (LOC101245637), transcript variant X1
sly-miR397	101250120	XM_004240105.3	mRNA	PREDICTED: Solanum lycopersicum laccase-7-like (LOC101250120)
sly-miR169b	101265980	XM_010313912.2	mRNA	PREDICTED: Solanum lycopersicum nuclear transcription factor Y subunit A-10-like (LOC101265980), transcript variant X4
sly-miR156e-5p	101257198	XM_004245724.3	mRNA	PREDICTED: Solanum lycopersicum uncharacterized LOC101257198 (LOC101257198), transcript variant X4
sly-miR156d-5p	101258473	XM_004244192.3	mRNA	PREDICTED: Solanum lycopersicum squamosa promoter-binding-like protein 3 (LOC101258473)
sly-miR6024	101243759	XM_019211210.1	mRNA	PREDICTED: Solanum lycopersicum putative late blight resistance protein homolog R1A-3 (LOC101243759), transcript variant X3
sly-miR390a-5p	101250736	XM_004229759.3	mRNA	PREDICTED: Solanum lycopersicum probable LRR receptor-like serine/threonine-protein kinase At1g34110 (LOC101250736)
sly-miR397	101251392	XM_004242454.3	mRNA	PREDICTED: Solanum lycopersicum laccase-3-like (LOC101251392)
sly-miR397	101263829	XM_004244124.3	mRNA	PREDICTED: Solanum lycopersicum organic cation/carnitine transporter 4-like (LOC101263829)
sly-miR156e-5p	101246055	XM_010322706.2	mRNA	PREDICTED: Solanum lycopersicum squamosa promoter-binding-like protein 12 (LOC101246055), transcript variant X5
sly-miR396b	543614	NM_001247395.2	mRNA	Solanum lycopersicum cysteine protease TDI-65 (tdi-65)
sly-miR156e-5p	101265616	XM_004251610.3	mRNA	PREDICTED: Solanum lycopersicum uncharacterized LOC101265616 (LOC101265616)
sly-miR169b	101247462	XM_010326192.2	mRNA	PREDICTED: Solanum lycopersicum nuclear transcription factor Y subunit A-9 (LOC101247462), transcript variant X2
sly-miR390a-5p	101246069	XM_004243150.3	mRNA	PREDICTED: Solanum lycopersicum leucine-rich repeat receptor-like serine/threonine-protein kinase At1g17230 (LOC101246069), transcript variant X1
sly-miR156b	101268335	XM_010314165.2	mRNA	PREDICTED: Solanum lycopersicum serine/threonine-protein kinase ATG1t (LOC101268335), transcript variant X4
sly-miR5303	101262024	XM_010325107.2	mRNA	PREDICTED: Solanum lycopersicum AP2-like ethylene-responsive transcription factor AIL5 (LOC101262024), transcript variant X2
sly-miR5303	104644768	XM_010315030.1	mRNA	PREDICTED: Solanum lycopersicum uncharacterized LOC104644768 (LOC104644768)
sly-miR482b	101259993	XM_010317401.2	mRNA	PREDICTED: Solanum lycopersicum probable disease resistance protein At4g27220 (LOC101259993), transcript variant X1
sly-miR169d	101265980	XM_010313912.2	mRNA	PREDICTED: Solanum lycopersicum nuclear transcription factor Y subunit A-10-like (LOC101265980), transcript variant X4
sly-miR397	101260651	XM_004241131.2	mRNA	PREDICTED: Solanum lycopersicum laccase-4-like (LOC101260651)
sly-miR156a	101253448	XM_004233094.3	mRNA	PREDICTED: Solanum lycopersicum cationic amino acid transporter 1 (LOC101253448), transcript variant X1
sly-miR5303	109118919	XM_019210971.1	mRNA	PREDICTED: Solanum lycopersicum transcription repressor OFP6 (LOC109118919)
sly-miR156b	101246055	XM_010322706.2	mRNA	PREDICTED: Solanum lycopersicum squamosa promoter-binding-like protein 12 (LOC101246055), transcript variant X5
sly-miR5303	104644457	XM_010314257.2	mRNA	PREDICTED: Solanum lycopersicum F-box protein At5g65850-like (LOC104644457), transcript variant X5
sly-miR169d	101247294	XM_010315462.2	mRNA	PREDICTED: Solanum lycopersicum nuclear transcription factor Y subunit A-7-like (LOC101247294), transcript variant X5
sly-miR397	101251693	XM_004242455.3	mRNA	PREDICTED: Solanum lycopersicum laccase-3-like (LOC101251693)
sly-miR5303	101244564	XM_019211654.1	mRNA	PREDICTED: Solanum lycopersicum serine carboxypeptidase-like 33 (LOC101244564), transcript variant X2
sly-miR5303	101261148	XM_004246489.3	mRNA	PREDICTED: Solanum lycopersicum uncharacterized LOC101261148 (LOC101261148)
sly-miR5303	543650	XM_010314894.2	mRNA	PREDICTED: Solanum lycopersicum aldehyde oxidase (AO1), transcript variant X2
sly-miR5303	101264473	XM_004249242.3	mRNA	PREDICTED: Solanum lycopersicum protein trichome birefringence-like (LOC101264473)
sly-miR399	101250073	XM_010318452.2	mRNA	PREDICTED: Solanum lycopersicum probable ubiquitin-conjugating enzyme E2 24 (LOC101250073), transcript variant X4
sly-miR156a	101251286	XM_004239191.3	mRNA	PREDICTED: Solanum lycopersicum teosinte glume architecture 1 (LOC101251286), transcript variant X5
sly-miR390a-5p	101257069	XM_004238117.2	mRNA	PREDICTED: Solanum lycopersicum probable protein phosphatase 2C 12 (LOC101257069)
sly-miR5303	101256353	XM_004251578.3	mRNA	PREDICTED: Solanum lycopersicum probable glycosyltransferase At3g07620 (LOC101256353), transcript variant X4
sly-miR1917	101265762	XM_004228639.3	mRNA	PREDICTED: Solanum lycopersicum putative E3 ubiquitin-protein ligase LIN-2 (LOC101265762), transcript variant X1
sly-miR5303	101256574	XM_004252928.3	mRNA	PREDICTED: Solanum lycopersicum xyloglucan endotransglucosylase/hydrolase 2 (LOC101256574), transcript variant X1
sly-miR5302b-3p	104646798	XM_010321262.1	mRNA	PREDICTED: Solanum lycopersicum E3 ubiquitin-protein ligase RING1-like (LOC104646798)
sly-miR5302b-3p	101258025	XM_010314579.2	mRNA	PREDICTED: Solanum lycopersicum uncharacterized LOC101258025 (LOC101258025), transcript variant X6
sly-miR169c	101265980	XM_019216174.1	mRNA	PREDICTED: Solanum lycopersicum nuclear transcription factor Y subunit A-10-like (LOC101265980), transcript variant X1
sly-miR5303	101266537	XM_004244046.3	mRNA	PREDICTED: Solanum lycopersicum uncharacterized LOC101266537 (LOC101266537)
sly-miR397	101262977	XM_004232371.3	mRNA	PREDICTED: Solanum lycopersicum laccase-11-like (LOC101262977)
sly-miR6022	101267635	XM_004228394.3	mRNA	PREDICTED: Solanum lycopersicum receptor-like protein 12 (LOC101267635), transcript variant X1
sly-miR5303	101254088	XM_004238879.3	mRNA	PREDICTED: Solanum lycopersicum LOB domain-containing protein 42-like (LOC101254088)
sly-miR164b-5p	101256624	XM_004229201.3	mRNA	PREDICTED: Solanum lycopersicum UDP-glucuronic acid decarboxylase 4-like (LOC101256624)
sly-miR396b	101246103	XM_004231824.3	mRNA	PREDICTED: Solanum lycopersicum zingipain-2-like (LOC101246103)
sly-miR156e-5p	101251873	XM_010321037.2	mRNA	PREDICTED: Solanum lycopersicum protein high chlorophyll fluorescent 107 (LOC101251873)
sly-miR5303	101256210	XM_004228357.3	mRNA	PREDICTED: Solanum lycopersicum zinc finger protein 91-like (LOC101256210)
sly-miR396a-3p	109118690	XM_019215231.1	mRNA	PREDICTED: Solanum lycopersicum uncharacterized LOC109118690 (LOC109118690), transcript variant X2
sly-miR169e-3p	101249343	XM_010320121.2	mRNA	PREDICTED: Solanum lycopersicum uncharacterized LOC101249343 (LOC101249343), transcript variant X1
sly-miR156b	101264297	XM_004252201.3	mRNA	PREDICTED: Solanum lycopersicum squamosa promoter-binding-like protein 6 (LOC101264297)
sly-miR5303	101253583	XM_004238190.2	mRNA	PREDICTED: Solanum lycopersicum probable protein phosphatase 2C 55 (LOC101253583), transcript variant X1
sly-miR156e-5p	101246055	XM_010322704.2	mRNA	PREDICTED: Solanum lycopersicum squamosa promoter-binding-like protein 12 (LOC101246055), transcript variant X2
sly-miR5303	101258121	XM_010318311.2	mRNA	PREDICTED: Solanum lycopersicum vacuolar protein sorting-associated protein 28 homolog 2 (LOC101258121), transcript variant X5
sly-miR156d-5p	101251286	XM_004239190.3	mRNA	PREDICTED: Solanum lycopersicum teosinte glume architecture 1 (LOC101251286), transcript variant X2
sly-miR156d-5p	101246055	XM_010322707.2	mRNA	PREDICTED: Solanum lycopersicum squamosa promoter-binding-like protein 12 (LOC101246055), transcript variant X7
sly-miR156a	101246055	XM_010322705.2	mRNA	PREDICTED: Solanum lycopersicum squamosa promoter-binding-like protein 12 (LOC101246055), transcript variant X4
sly-miR5303	101267021	XM_004238752.3	mRNA	PREDICTED: Solanum lycopersicum uncharacterized LOC101267021 (LOC101267021)
sly-miR1917	101248526	XM_010329153.2	mRNA	PREDICTED: Solanum lycopersicum sodium channel modifier 1 (LOC101248526), transcript variant X1
sly-miR156e-5p	101257198	XM_010327182.2	mRNA	PREDICTED: Solanum lycopersicum uncharacterized LOC101257198 (LOC101257198), transcript variant X7
sly-miR156b	101251286	XM_010322716.2	mRNA	PREDICTED: Solanum lycopersicum teosinte glume architecture 1 (LOC101251286), transcript variant X4
sly-miR6024	101262730	XM_010324556.2	mRNA	PREDICTED: Solanum lycopersicum putative late blight resistance protein homolog R1B-23 (LOC101262730), transcript variant X1
sly-miR1917	101248526	XM_010329155.2	mRNA	PREDICTED: Solanum lycopersicum sodium channel modifier 1 (LOC101248526), transcript variant X6
sly-miR5303	101244979	XM_004245430.3	mRNA	PREDICTED: Solanum lycopersicum probable trehalase (LOC101244979)
sly-miR1918	101261867	XM_004249817.3	mRNA	PREDICTED: Solanum lycopersicum RING-H2 finger protein ATL78-like (LOC101261867)
sly-miR5303	101262024	XM_010325106.2	mRNA	PREDICTED: Solanum lycopersicum AP2-like ethylene-responsive transcription factor AIL5 (LOC101262024), transcript variant X1
sly-miR156d-5p	101251286	XM_004239191.3	mRNA	PREDICTED: Solanum lycopersicum teosinte glume architecture 1 (LOC101251286), transcript variant X5
sly-miR397	101244455	XM_010318418.2	mRNA	PREDICTED: Solanum lycopersicum serine carboxypeptidase-like 31 (LOC101244455), transcript variant X1
sly-miR390a-5p	101245637	XM_010320887.2	mRNA	PREDICTED: Solanum lycopersicum leucine-rich repeat receptor-like tyrosine-protein kinase PXC3 (LOC101245637), transcript variant X2
sly-miR156e-5p	101258473	XM_004244192.3	mRNA	PREDICTED: Solanum lycopersicum squamosa promoter-binding-like protein 3 (LOC101258473)
sly-miR1918	101265510	XM_019212752.1	mRNA	PREDICTED: Solanum lycopersicum uncharacterized LOC101265510 (LOC101265510)
sly-miR164a-5p	100301934	NM_001247325.2	mRNA	Solanum lycopersicum NO APICAL MERISTEM (NAM)
sly-miR396b	101254030	XM_010328291.2	mRNA	PREDICTED: Solanum lycopersicum transcription factor bHLH125-like (LOC101254030), transcript variant X1
sly-miR6024	101248269	XM_004251348.3	mRNA	PREDICTED: Solanum lycopersicum putative late blight resistance protein homolog R1A-10 (LOC101248269)
sly-miR5303	101260874	XM_010328881.2	mRNA	PREDICTED: Solanum lycopersicum cell differentiation protein RCD1 homolog (LOC101260874), transcript variant X3
sly-miR169b	101263620	XM_010324324.2	mRNA	PREDICTED: Solanum lycopersicum protein TIFY 6B-like (LOC101263620)
sly-miR169e-3p	101259832	XM_004237345.3	mRNA	PREDICTED: Solanum lycopersicum uncharacterized LOC101259832 (LOC101259832)
sly-miR156c	101261007	XM_004236023.2	mRNA	PREDICTED: Solanum lycopersicum squamosa promoter-binding-like protein (LOC101261007)
sly-miR319c-3p	100037511	NM_001247428.2	mRNA	Solanum lycopersicum GAMyb-like1 (LOC100037511)
sly-miR164b-5p	101255705	XM_004241538.3	mRNA	PREDICTED: Solanum lycopersicum NAC domain-containing protein 100-like (LOC101255705)
sly-miR396b	101257617	XM_010317391.1	mRNA	PREDICTED: Solanum lycopersicum uncharacterized LOC101257617 (LOC101257617), transcript variant X2
sly-miR5303	101255967	XM_010315886.2	mRNA	PREDICTED: Solanum lycopersicum probable DNA double-strand break repair Rad50 ATPase (LOC101255967), transcript variant X2
sly-miR397	101245661	XM_004241169.3	mRNA	PREDICTED: Solanum lycopersicum laccase-2-like (LOC101245661)
sly-miR397	100147721	NM_001246887.2	mRNA	Solanum lycopersicum laccase (LOC100147721)
sly-miR397	101253711	XM_004246377.3	mRNA	PREDICTED: Solanum lycopersicum laccase-17-like (LOC101253711)
sly-miR5303	101259276	XM_010325998.1	mRNA	PREDICTED: Solanum lycopersicum probable 6-phosphogluconolactonase 2 (LOC101259276), transcript variant X2
sly-miR5303	101248187	XM_004237053.3	mRNA	PREDICTED: Solanum lycopersicum zeatin O-glucosyltransferase-like (LOC101248187)
sly-miR396a-5p	101259468	XM_010326858.2	mRNA	PREDICTED: Solanum lycopersicum protein DDB_G0276689 (LOC101259468), transcript variant X1
sly-miR5303	101255967	XM_010315887.2	mRNA	PREDICTED: Solanum lycopersicum probable DNA double-strand break repair Rad50 ATPase (LOC101255967), transcript variant X1
sly-miR169b	101247462	NM_001329119.1	mRNA	Solanum lycopersicum nuclear transcription factor Y subunit A-9 (LOC101247462)
sly-miR169b	101247294	XM_010315460.2	mRNA	PREDICTED: Solanum lycopersicum nuclear transcription factor Y subunit A-7-like (LOC101247294), transcript variant X3
sly-miR5303	104644455	XM_010314229.2	mRNA	PREDICTED: Solanum lycopersicum uncharacterized LOC104644455 (LOC104644455)
sly-miR169d	101247294	XM_010315459.2	mRNA	PREDICTED: Solanum lycopersicum nuclear transcription factor Y subunit A-7-like (LOC101247294), transcript variant X2
sly-miR169b	101265980	XM_010313911.2	mRNA	PREDICTED: Solanum lycopersicum nuclear transcription factor Y subunit A-10-like (LOC101265980), transcript variant X2
sly-miR5303	101257823	XM_004249773.3	mRNA	PREDICTED: Solanum lycopersicum transcription factor TGA2.3-like (LOC101257823)
sly-miR156a	101246055	XM_010322706.2	mRNA	PREDICTED: Solanum lycopersicum squamosa promoter-binding-like protein 12 (LOC101246055), transcript variant X5
sly-miR399	101250073	XM_010318450.2	mRNA	PREDICTED: Solanum lycopersicum probable ubiquitin-conjugating enzyme E2 24 (LOC101250073), transcript variant X1
sly-miR5303	101254625	XM_004228516.3	mRNA	PREDICTED: Solanum lycopersicum transcription repressor OFP6 (LOC101254625)
sly-miR169d	101246742	XM_004245011.3	mRNA	PREDICTED: Solanum lycopersicum nuclear transcription factor Y subunit A-8 (LOC101246742), transcript variant X1
sly-miR156b	101246055	XM_010322705.2	mRNA	PREDICTED: Solanum lycopersicum squamosa promoter-binding-like protein 12 (LOC101246055), transcript variant X4
sly-miR9478-3p	101248189	XM_010321472.2	mRNA	PREDICTED: Solanum lycopersicum uncharacterized protein sll1770 (LOC101248189), transcript variant X2
sly-miR169b	101247462	XM_019213218.1	mRNA	PREDICTED: Solanum lycopersicum nuclear transcription factor Y subunit A-9 (LOC101247462), transcript variant X3
sly-miR156e-5p	101249553	XM_010323413.2	mRNA	PREDICTED: Solanum lycopersicum uncharacterized LOC101249553 (LOC101249553)
sly-miR156d-5p	101246055	XM_010322705.2	mRNA	PREDICTED: Solanum lycopersicum squamosa promoter-binding-like protein 12 (LOC101246055), transcript variant X4
sly-miR156d-5p	101246055	XM_010322702.2	mRNA	PREDICTED: Solanum lycopersicum squamosa promoter-binding-like protein 12 (LOC101246055), transcript variant X1
sly-miR169d	101257995	XM_004228610.3	mRNA	PREDICTED: Solanum lycopersicum nuclear transcription factor Y subunit A-10 (LOC101257995)
sly-miR482a	101264881	XM_004249991.3	mRNA	PREDICTED: Solanum lycopersicum probable pectate lyase 13 (LOC101264881), transcript variant X1
sly-miR169e-3p	101249343	XM_010320123.2	mRNA	PREDICTED: Solanum lycopersicum uncharacterized LOC101249343 (LOC101249343), transcript variant X3
sly-miR5303	101245063	XM_004240161.1	mRNA	PREDICTED: Solanum lycopersicum triacylglycerol lipase 2-like (LOC101245063)
sly-miR6024	101252953	XM_019210965.1	mRNA	PREDICTED: Solanum lycopersicum putative disease resistance protein At3g14460 (LOC101252953)
sly-miR169d	101247294	XM_010315461.2	mRNA	PREDICTED: Solanum lycopersicum nuclear transcription factor Y subunit A-7-like (LOC101247294), transcript variant X4
sly-miR164b-5p	100301934	NM_001247325.2	mRNA	Solanum lycopersicum NO APICAL MERISTEM (NAM)
sly-miR5303	101244740	NM_001346868.1	mRNA	Solanum lycopersicum reticulata-related protein (LOC101244740)
sly-miR156d-5p	101250391	XM_004236397.2	mRNA	PREDICTED: Solanum lycopersicum ABC transporter C family member 13 (LOC101250391), transcript variant X1
sly-miR5303	101265650	XM_019214161.1	mRNA	PREDICTED: Solanum lycopersicum receptor-like cytosolic serine/threonine-protein kinase RBK2 (LOC101265650), transcript variant X1
sly-miR5303	101245139	XM_004252220.3	mRNA	PREDICTED: Solanum lycopersicum uncharacterized LOC101245139 (LOC101245139)
sly-miR5303	101247682	XM_004250187.3	mRNA	PREDICTED: Solanum lycopersicum zinc finger protein 4 (LOC101247682), transcript variant X1
sly-miR6022	101245771	XM_004242262.3	mRNA	PREDICTED: Solanum lycopersicum pentatricopeptide repeat-containing protein At4g20770 (LOC101245771)
sly-miR5303	101264361	XM_004246670.3	mRNA	PREDICTED: Solanum lycopersicum uncharacterized LOC101264361 (LOC101264361)
sly-miR169b	101246742	XM_010326711.2	mRNA	PREDICTED: Solanum lycopersicum nuclear transcription factor Y subunit A-8 (LOC101246742), transcript variant X2
sly-miR399	101250073	XM_004232829.3	mRNA	PREDICTED: Solanum lycopersicum probable ubiquitin-conjugating enzyme E2 24 (LOC101250073), transcript variant X2
sly-miR1917	101262129	XM_004242914.3	mRNA	PREDICTED: Solanum lycopersicum cytochrome P450 734A1-like (LOC101262129)
sly-miR5303	101250780	XM_004235244.3	mRNA	PREDICTED: Solanum lycopersicum SWI/SNF complex subunit SWI3A (LOC101250780)
sly-miR482a	101264881	XM_010314291.1	mRNA	PREDICTED: Solanum lycopersicum probable pectate lyase 13 (LOC101264881), transcript variant X4
sly-miR5303	104644457	XM_010314253.2	mRNA	PREDICTED: Solanum lycopersicum F-box protein At5g65850-like (LOC104644457), transcript variant X1
sly-miR156b	101246055	XM_004239169.3	mRNA	PREDICTED: Solanum lycopersicum squamosa promoter-binding-like protein 12 (LOC101246055), transcript variant X6
sly-miR5303	101264865	XM_004248292.3	mRNA	PREDICTED: Solanum lycopersicum transcription factor bHLH123-like (LOC101264865)
sly-miR164a-5p	101252831	XM_004249542.3	mRNA	PREDICTED: Solanum lycopersicum cactin (LOC101252831)
sly-miR6024	101252606	XM_004244173.3	mRNA	PREDICTED: Solanum lycopersicum uncharacterized LOC101252606 (LOC101252606), transcript variant X1
sly-miR5303	101268104	XM_004239361.3	mRNA	PREDICTED: Solanum lycopersicum LEAF RUST 10 DISEASE-RESISTANCE LOCUS RECEPTOR-LIKE PROTEIN KINASE-like 1.1 (LOC101268104)
sly-miR5303	101263923	NM_001279091.2	mRNA	Solanum lycopersicum L-lactate dehydrogenase (ldh2)
sly-miR396b	101261277	XM_004249065.3	mRNA	PREDICTED: Solanum lycopersicum DNA (cytosine-5)-methyltransferase DRM1 (LOC101261277)
sly-miR5303	101253583	XM_010322075.2	mRNA	PREDICTED: Solanum lycopersicum probable protein phosphatase 2C 55 (LOC101253583), transcript variant X2
sly-miR156a	101261007	XM_004236023.2	mRNA	PREDICTED: Solanum lycopersicum squamosa promoter-binding-like protein (LOC101261007)
sly-miR156e-5p	101257198	XM_010327183.2	mRNA	PREDICTED: Solanum lycopersicum uncharacterized LOC101257198 (LOC101257198), transcript variant X8
sly-miR396a-3p	109118690	XM_019215232.1	mRNA	PREDICTED: Solanum lycopersicum uncharacterized LOC109118690 (LOC109118690), transcript variant X3
sly-miR396b	101260915	XM_004252707.3	mRNA	PREDICTED: Solanum lycopersicum scopoletin glucosyltransferase-like (LOC101260915), transcript variant X1
sly-miR164b-5p	101261342	XM_019214651.1	mRNA	PREDICTED: Solanum lycopersicum NAC domain-containing protein 21/22 (LOC101261342), transcript variant X2
sly-miR156e-5p	101262615	XM_004238983.3	mRNA	PREDICTED: Solanum lycopersicum squamosa promoter-binding-like protein 6 (LOC101262615)
sly-miR5303	101255967	XM_004252181.3	mRNA	PREDICTED: Solanum lycopersicum probable DNA double-strand break repair Rad50 ATPase (LOC101255967), transcript variant X3
sly-miR169d	101265980	XM_010313911.2	mRNA	PREDICTED: Solanum lycopersicum nuclear transcription factor Y subunit A-10-like (LOC101265980), transcript variant X2
sly-miR5303	101245650	XM_019214054.1	mRNA	PREDICTED: Solanum lycopersicum AF4/FMR2 family member 4 (LOC101245650), transcript variant X5
sly-miR156d-5p	101246669	NM_001320680.1	mRNA	Solanum lycopersicum squamosa promoter binding-like protein 3 (SBP3)
sly-miR156c	101246055	XM_010322702.2	mRNA	PREDICTED: Solanum lycopersicum squamosa promoter-binding-like protein 12 (LOC101246055), transcript variant X1
sly-miR169b	101247462	XM_019213207.1	mRNA	PREDICTED: Solanum lycopersicum nuclear transcription factor Y subunit A-9 (LOC101247462), transcript variant X1
sly-miR1917	101259864	XM_019215391.1	mRNA	PREDICTED: Solanum lycopersicum 6,7-dimethyl-8-ribityllumazine synthase, chloroplastic (LOC101259864), transcript variant X2
sly-miR164a-5p	101261342	XM_004243945.2	mRNA	PREDICTED: Solanum lycopersicum NAC domain-containing protein 21/22 (LOC101261342), transcript variant X1
sly-miR164b-5p	101261342	XM_004243945.2	mRNA	PREDICTED: Solanum lycopersicum NAC domain-containing protein 21/22 (LOC101261342), transcript variant X1
sly-miR156c	101246055	XM_010322703.2	mRNA	PREDICTED: Solanum lycopersicum squamosa promoter-binding-like protein 12 (LOC101246055), transcript variant X3
sly-miR390b-5p	101268564	XM_004237174.1	mRNA	PREDICTED: Solanum lycopersicum probable LRR receptor-like serine/threonine-protein kinase RPK1 (LOC101268564)
sly-miR169e-3p	101267034	XM_010324841.2	mRNA	PREDICTED: Solanum lycopersicum chaperone protein ClpB1-like (LOC101267034)
sly-miR6024	101246181	XM_004247831.3	mRNA	PREDICTED: Solanum lycopersicum disease resistance protein RPP13-like (LOC101246181)
sly-miR169c	101247294	XM_010315461.2	mRNA	PREDICTED: Solanum lycopersicum nuclear transcription factor Y subunit A-7-like (LOC101247294), transcript variant X4
sly-miR482b	109118728	XM_019213274.1	mRNA	PREDICTED: Solanum lycopersicum disease resistance protein RPP13-like (LOC109118728)
sly-miR6024	101252606	XM_010326059.2	mRNA	PREDICTED: Solanum lycopersicum uncharacterized LOC101252606 (LOC101252606), transcript variant X2
sly-miR319c-3p	100037511	XM_010320926.2	mRNA	PREDICTED: Solanum lycopersicum GAMyb-like1 (LOC100037511), transcript variant X1
sly-miR9472-3p	101257658	XM_004238119.3	mRNA	PREDICTED: Solanum lycopersicum uncharacterized LOC101257658 (LOC101257658)
sly-miR5303	101255622	XM_010327713.2	mRNA	PREDICTED: Solanum lycopersicum uncharacterized LOC101255622 (LOC101255622), transcript variant X3
sly-miR390a-5p	101245637	XM_004236567.3	mRNA	PREDICTED: Solanum lycopersicum leucine-rich repeat receptor-like tyrosine-protein kinase PXC3 (LOC101245637), transcript variant X1
sly-miR5303	101265644	XM_004240147.2	mRNA	PREDICTED: Solanum lycopersicum exocyst complex component EXO70A1 (LOC101265644)
sly-miR156d-5p	101251286	XM_019214096.1	mRNA	PREDICTED: Solanum lycopersicum teosinte glume architecture 1 (LOC101251286), transcript variant X3
sly-miR156a	101262615	XM_004238983.3	mRNA	PREDICTED: Solanum lycopersicum squamosa promoter-binding-like protein 6 (LOC101262615)
sly-miR5303	104644457	XM_010314255.2	mRNA	PREDICTED: Solanum lycopersicum F-box protein At5g65850-like (LOC104644457), transcript variant X3
sly-miR156d-5p	101251286	XM_010322715.2	mRNA	PREDICTED: Solanum lycopersicum teosinte glume architecture 1 (LOC101251286), transcript variant X1
sly-miR6024	101249231	XM_004250361.3	mRNA	PREDICTED: Solanum lycopersicum putative late blight resistance protein homolog R1B-16 (LOC101249231)
sly-miR482b	101255563	XM_010315680.2	mRNA	PREDICTED: Solanum lycopersicum putative late blight resistance protein homolog R1B-8 (LOC101255563)
sly-miR156a	101251286	XM_010322716.2	mRNA	PREDICTED: Solanum lycopersicum teosinte glume architecture 1 (LOC101251286), transcript variant X4
sly-miR169d	101247462	XM_010326192.2	mRNA	PREDICTED: Solanum lycopersicum nuclear transcription factor Y subunit A-9 (LOC101247462), transcript variant X2
sly-miR5303	101247294	XM_010315459.2	mRNA	PREDICTED: Solanum lycopersicum nuclear transcription factor Y subunit A-7-like (LOC101247294), transcript variant X2
sly-miR156e-5p	101246055	XM_010322705.2	mRNA	PREDICTED: Solanum lycopersicum squamosa promoter-binding-like protein 12 (LOC101246055), transcript variant X4
sly-miR396a-5p	101245462	XM_010323466.2	mRNA	PREDICTED: Solanum lycopersicum ubiquitin-activating enzyme E1 1 (LOC101245462), transcript variant X2
sly-miR399	101250073	XM_010318451.2	mRNA	PREDICTED: Solanum lycopersicum probable ubiquitin-conjugating enzyme E2 24 (LOC101250073), transcript variant X3
sly-miR5303	101256438	XM_004249697.3	mRNA	PREDICTED: Solanum lycopersicum trans-resveratrol di-O-methyltransferase-like (LOC101256438)
sly-miR5303	101249399	XM_004246535.3	mRNA	PREDICTED: Solanum lycopersicum serine/threonine-protein kinase SRPK (LOC101249399)
sly-miR156a	101253448	XM_019212258.1	mRNA	PREDICTED: Solanum lycopersicum cationic amino acid transporter 1 (LOC101253448), transcript variant X3
sly-miR5303	101254104	XM_004241875.3	mRNA	PREDICTED: Solanum lycopersicum RING-H2 finger protein ATL3-like (LOC101254104)
sly-miR482a	101262610	XM_004237154.3	mRNA	PREDICTED: Solanum lycopersicum TMV resistance protein N-like (LOC101262610)
sly-miR169c	101246742	XM_010326711.2	mRNA	PREDICTED: Solanum lycopersicum nuclear transcription factor Y subunit A-8 (LOC101246742), transcript variant X2
sly-miR169d	101265980	XM_019216175.1	mRNA	PREDICTED: Solanum lycopersicum nuclear transcription factor Y subunit A-10-like (LOC101265980), transcript variant X3
sly-miR156a	101246055	XM_010322704.2	mRNA	PREDICTED: Solanum lycopersicum squamosa promoter-binding-like protein 12 (LOC101246055), transcript variant X2
sly-miR5303	104647800	XM_010323609.2	mRNA	PREDICTED: Solanum lycopersicum dentin sialophosphoprotein-like (LOC104647800)
sly-miR169b	101247294	XM_004251633.3	mRNA	PREDICTED: Solanum lycopersicum nuclear transcription factor Y subunit A-7-like (LOC101247294), transcript variant X1
sly-miR6024	101266073	XM_019216093.1	mRNA	PREDICTED: Solanum lycopersicum putative late blight resistance protein homolog R1B-12 (LOC101266073), transcript variant X2
sly-miR169c	101265980	XM_010313911.2	mRNA	PREDICTED: Solanum lycopersicum nuclear transcription factor Y subunit A-10-like (LOC101265980), transcript variant X2
sly-miR396b	101255598	XM_004240729.1	mRNA	PREDICTED: Solanum lycopersicum uncharacterized LOC101255598 (LOC101255598)
sly-miR169b	101247294	XM_010315462.2	mRNA	PREDICTED: Solanum lycopersicum nuclear transcription factor Y subunit A-7-like (LOC101247294), transcript variant X5
sly-miR156e-5p	101251739	XM_004250288.3	mRNA	PREDICTED: Solanum lycopersicum phosphatidylinositol 4-phosphate 5-kinase 2 (LOC101251739)
sly-miR169c	101265980	XM_010313912.2	mRNA	PREDICTED: Solanum lycopersicum nuclear transcription factor Y subunit A-10-like (LOC101265980), transcript variant X4
sly-miR482c	101248751	XM_004252090.3	mRNA	PREDICTED: Solanum lycopersicum probable disease resistance protein At4g27220 (LOC101248751)
sly-miR9470-3p	101252401	XR_741895.2	LncRNA	PREDICTED: Solanum lycopersicum uncharacterized LOC101252401 (LOC101252401), transcript variant X2
sly-miR482d-3p	101252491	XR_002028064.1	LncRNA	PREDICTED: Solanum lycopersicum uncharacterized LOC101252491 (LOC101252491)
sly-miR482b	101259993	XR_739443.2	LncRNA	PREDICTED: Solanum lycopersicum probable disease resistance protein At4g27220 (LOC101259993), transcript variant X3
sly-miR156d-5p	104649203	XR_743150.2	LncRNA	PREDICTED: Solanum lycopersicum uncharacterized LOC104649203 (LOC104649203), transcript variant X2
sly-miR9470-3p	101252401	XR_741896.2	LncRNA	PREDICTED: Solanum lycopersicum uncharacterized LOC101252401 (LOC101252401), transcript variant X3
sly-miR396a-3p	101248470	XR_183399.2	LncRNA	PREDICTED: Solanum lycopersicum uncharacterized LOC101248470 (LOC101248470)
sly-miR9470-3p	101252401	XR_741894.2	LncRNA	PREDICTED: Solanum lycopersicum uncharacterized LOC101252401 (LOC101252401), transcript variant X1
sly-miR482b	101259993	XR_739444.2	LncRNA	PREDICTED: Solanum lycopersicum probable disease resistance protein At4g27220 (LOC101259993), transcript variant X4
sly-miR9478-3p	101260738	XR_002028190.1	LncRNA	PREDICTED: Solanum lycopersicum uncharacterized LOC101260738 (LOC101260738), transcript variant X6
sly-miR482a	101262730	XR_742102.2	LncRNA	PREDICTED: Solanum lycopersicum putative late blight resistance protein homolog R1B-23 (LOC101262730), transcript variant X3
sly-miR169c	109120960	XR_002028384.1	LncRNA	PREDICTED: Solanum lycopersicum uncharacterized LOC109120960 (LOC109120960)
sly-miR9470-3p	101252401	XR_741900.2	LncRNA	PREDICTED: Solanum lycopersicum uncharacterized LOC101252401 (LOC101252401), transcript variant X7
sly-miR396a-5p	101248470	XR_183399.2	LncRNA	PREDICTED: Solanum lycopersicum uncharacterized LOC101248470 (LOC101248470)
sly-miR482c	101243759	XR_738323.2	LncRNA	PREDICTED: Solanum lycopersicum putative late blight resistance protein homolog R1A-3 (LOC101243759), transcript variant X4
sly-miR5303	104647618	XR_741726.2	LncRNA	PREDICTED: Solanum lycopersicum uncharacterized LOC104647618 (LOC104647618)
sly-miR482b	101259993	XR_739442.2	LncRNA	PREDICTED: Solanum lycopersicum probable disease resistance protein At4g27220 (LOC101259993), transcript variant X2
sly-miR1917	101248526	XR_743524.2	LncRNA	PREDICTED: Solanum lycopersicum sodium channel modifier 1 (LOC101248526), transcript variant X7
sly-miR9478-3p	101255949	XR_183241.3	LncRNA	PREDICTED: Solanum lycopersicum uncharacterized LOC101255949 (LOC101255949)
sly-miR1917	104646091	XR_002027226.1	LncRNA	PREDICTED: Solanum lycopersicum uncharacterized LOC104646091 (LOC104646091), transcript variant X1
sly-miR9478-3p	101260738	XR_002028188.1	LncRNA	PREDICTED: Solanum lycopersicum uncharacterized LOC101260738 (LOC101260738), transcript variant X4
sly-miR9478-3p	101260738	XR_002028187.1	LncRNA	PREDICTED: Solanum lycopersicum uncharacterized LOC101260738 (LOC101260738), transcript variant X3
sly-miR5302b-3p	101258025	XR_002026163.1	LncRNA	PREDICTED: Solanum lycopersicum uncharacterized LOC101258025 (LOC101258025), transcript variant X1
sly-miR156c	101268335	XR_002026094.1	LncRNA	PREDICTED: Solanum lycopersicum serine/threonine-protein kinase ATG1t (LOC101268335), transcript variant X2
sly-miR9478-3p	101260738	XR_002028186.1	LncRNA	PREDICTED: Solanum lycopersicum uncharacterized LOC101260738 (LOC101260738), transcript variant X2
sly-miR9470-3p	101252401	XR_741898.2	LncRNA	PREDICTED: Solanum lycopersicum uncharacterized LOC101252401 (LOC101252401), transcript variant X5
sly-miR1918	101248127	XR_002028596.1	LncRNA	PREDICTED: Solanum lycopersicum mediator of RNA polymerase II transcription subunit 19a (LOC101248127), transcript variant X2
sly-miR169b	109120960	XR_002028384.1	LncRNA	PREDICTED: Solanum lycopersicum uncharacterized LOC109120960 (LOC109120960)
sly-miR156d-5p	104649203	XR_743153.2	LncRNA	PREDICTED: Solanum lycopersicum uncharacterized LOC104649203 (LOC104649203), transcript variant X5
sly-miR6024	101243759	XR_738323.2	LncRNA	PREDICTED: Solanum lycopersicum putative late blight resistance protein homolog R1A-3 (LOC101243759), transcript variant X4
sly-miR9472-3p	104648987	XR_742948.1	LncRNA	PREDICTED: Solanum lycopersicum uncharacterized LOC104648987 (LOC104648987), transcript variant X1
sly-miR5303	101263241	XR_739455.2	LncRNA	PREDICTED: Solanum lycopersicum histone-lysine N-methyltransferase ATXR7 (LOC101263241), transcript variant X1
sly-miR1917	101254870	XR_738601.2	LncRNA	PREDICTED: Solanum lycopersicum uncharacterized LOC101254870 (LOC101254870), transcript variant X1
sly-miR1918	101248127	XR_002028595.1	LncRNA	PREDICTED: Solanum lycopersicum mediator of RNA polymerase II transcription subunit 19a (LOC101248127), transcript variant X1
sly-miR1917	101248526	XR_002028798.1	LncRNA	PREDICTED: Solanum lycopersicum sodium channel modifier 1 (LOC101248526), transcript variant X9
sly-miR156e-5p	101257198	XR_742905.2	LncRNA	PREDICTED: Solanum lycopersicum uncharacterized LOC101257198 (LOC101257198), transcript variant X10
sly-miR156b	101268335	XR_002026094.1	LncRNA	PREDICTED: Solanum lycopersicum serine/threonine-protein kinase ATG1t (LOC101268335), transcript variant X2
sly-miR9478-3p	101260738	XR_002028195.1	LncRNA	PREDICTED: Solanum lycopersicum uncharacterized LOC101260738 (LOC101260738), transcript variant X11
sly-miR5303	101263241	XR_739460.2	LncRNA	PREDICTED: Solanum lycopersicum histone-lysine N-methyltransferase ATXR7 (LOC101263241), transcript variant X8
sly-miR5303	101265173	XR_743399.2	LncRNA	PREDICTED: Solanum lycopersicum uncharacterized LOC101265173 (LOC101265173)
sly-miR156d-5p	104649203	XR_743149.2	LncRNA	PREDICTED: Solanum lycopersicum uncharacterized LOC104649203 (LOC104649203), transcript variant X1
sly-miR1917	543908	NR_131258.1	LncRNA	Solanum lycopersicum CTR1-like protein kinase (CTR4), transcript variant 2, non-coding RNA
sly-miR9478-3p	101260738	XR_002028191.1	LncRNA	PREDICTED: Solanum lycopersicum uncharacterized LOC101260738 (LOC101260738), transcript variant X7
sly-miR9478-3p	101260738	XR_002028194.1	LncRNA	PREDICTED: Solanum lycopersicum uncharacterized LOC101260738 (LOC101260738), transcript variant X10
sly-miR156d-5p	104649203	XR_002028461.1	LncRNA	PREDICTED: Solanum lycopersicum uncharacterized LOC104649203 (LOC104649203), transcript variant X6
sly-miR156e-5p	101257198	XR_742904.2	LncRNA	PREDICTED: Solanum lycopersicum uncharacterized LOC101257198 (LOC101257198), transcript variant X9
sly-miR5303	101263241	XR_002027687.1	LncRNA	PREDICTED: Solanum lycopersicum histone-lysine N-methyltransferase ATXR7 (LOC101263241), transcript variant X10
sly-miR319c-3p	104648942	XR_742876.2	LncRNA	PREDICTED: Solanum lycopersicum microRNA miR319a/b precursor (LOC104648942)
sly-miR9470-3p	101252401	XR_741899.2	LncRNA	PREDICTED: Solanum lycopersicum uncharacterized LOC101252401 (LOC101252401), transcript variant X6
sly-miR1917	101254870	XR_738603.2	LncRNA	PREDICTED: Solanum lycopersicum uncharacterized LOC101254870 (LOC101254870), transcript variant X2
sly-miR156a	101268335	XR_002026094.1	LncRNA	PREDICTED: Solanum lycopersicum serine/threonine-protein kinase ATG1t (LOC101268335), transcript variant X2
sly-miR1917	101248526	XR_743525.2	LncRNA	PREDICTED: Solanum lycopersicum sodium channel modifier 1 (LOC101248526), transcript variant X8
sly-miR482d-3p	101262730	XR_742102.2	LncRNA	PREDICTED: Solanum lycopersicum putative late blight resistance protein homolog R1B-23 (LOC101262730), transcript variant X3
sly-miR5303	101263241	XR_739461.2	LncRNA	PREDICTED: Solanum lycopersicum histone-lysine N-methyltransferase ATXR7 (LOC101263241), transcript variant X9
sly-miR9478-3p	101260738	XR_742164.2	LncRNA	PREDICTED: Solanum lycopersicum uncharacterized LOC101260738 (LOC101260738), transcript variant X1
sly-miR5302b-3p	101258025	XR_002026164.1	LncRNA	PREDICTED: Solanum lycopersicum uncharacterized LOC101258025 (LOC101258025), transcript variant X2
sly-miR6024	101262730	XR_742102.2	LncRNA	PREDICTED: Solanum lycopersicum putative late blight resistance protein homolog R1B-23 (LOC101262730), transcript variant X3
sly-miR1918	101255660	XR_740085.2	LncRNA	PREDICTED: Solanum lycopersicum uncharacterized LOC101255660 (LOC101255660)
sly-miR390a-5p	101245791	XR_002028063.1	LncRNA	PREDICTED: Solanum lycopersicum trans-acting siRNA 3-1 (TAS3-1)
sly-miR9470-3p	101249506	XR_002028765.1	LncRNA	PREDICTED: Solanum lycopersicum bifunctional protein FolD 2 (LOC101249506), transcript variant X4
sly-miR5302b-3p	101258025	XR_002026165.1	LncRNA	PREDICTED: Solanum lycopersicum uncharacterized LOC101258025 (LOC101258025), transcript variant X4
sly-miR399	104646139	XR_740288.2	LncRNA	PREDICTED: Solanum lycopersicum uncharacterized LOC104646139 (LOC104646139), transcript variant X2
sly-miR9472-3p	104648987	XR_742949.1	LncRNA	PREDICTED: Solanum lycopersicum uncharacterized LOC104648987 (LOC104648987), transcript variant X2
sly-miR5303	101248222	XR_742557.2	LncRNA	PREDICTED: Solanum lycopersicum transglutaminase-like and tetratricopeptide repeat-containing protein (LOC101248222), transcript variant X1
sly-miR1918	101255957	XR_002026738.1	LncRNA	PREDICTED: Solanum lycopersicum uncharacterized LOC101255957 (LOC101255957)
sly-miR169d	104646522	XR_740621.1	LncRNA	PREDICTED: Solanum lycopersicum uncharacterized LOC104646522 (LOC104646522)
sly-miR5302b-3p	101258025	XR_002026166.1	LncRNA	PREDICTED: Solanum lycopersicum uncharacterized LOC101258025 (LOC101258025), transcript variant X5
sly-miR396b	101248470	XR_183399.2	LncRNA	PREDICTED: Solanum lycopersicum uncharacterized LOC101248470 (LOC101248470)
sly-miR5303	101263241	XR_739458.2	LncRNA	PREDICTED: Solanum lycopersicum histone-lysine N-methyltransferase ATXR7 (LOC101263241), transcript variant X5
sly-miR5303	101263241	XR_739456.2	LncRNA	PREDICTED: Solanum lycopersicum histone-lysine N-methyltransferase ATXR7 (LOC101263241), transcript variant X3
sly-miR1918	101255521	XR_182285.3	LncRNA	PREDICTED: Solanum lycopersicum uncharacterized LOC101255521 (LOC101255521)
sly-miR9478-3p	101260738	XR_002028193.1	LncRNA	PREDICTED: Solanum lycopersicum uncharacterized LOC101260738 (LOC101260738), transcript variant X9
sly-miR397	101244455	XR_002026848.1	LncRNA	PREDICTED: Solanum lycopersicum serine carboxypeptidase-like 31 (LOC101244455), transcript variant X2
sly-miR156e-5p	101257198	XR_742902.2	LncRNA	PREDICTED: Solanum lycopersicum uncharacterized LOC101257198 (LOC101257198), transcript variant X5
sly-miR156e-5p	101257198	XR_742901.2	LncRNA	PREDICTED: Solanum lycopersicum uncharacterized LOC101257198 (LOC101257198), transcript variant X2
sly-miR164b-5p	101265344	XR_002027860.1	LncRNA	PREDICTED: Solanum lycopersicum uncharacterized LOC101265344 (LOC101265344), transcript variant X2
sly-miR5303	101263241	XR_739459.2	LncRNA	PREDICTED: Solanum lycopersicum histone-lysine N-methyltransferase ATXR7 (LOC101263241), transcript variant X7
sly-miR169d	109120960	XR_002028384.1	LncRNA	PREDICTED: Solanum lycopersicum uncharacterized LOC109120960 (LOC109120960)
sly-miR164a-5p	101265344	XR_002027860.1	LncRNA	PREDICTED: Solanum lycopersicum uncharacterized LOC101265344 (LOC101265344), transcript variant X2
sly-miR156e-5p	101257198	XR_002028395.1	LncRNA	PREDICTED: Solanum lycopersicum uncharacterized LOC101257198 (LOC101257198), transcript variant X3
sly-miR399	104646139	XR_002027182.1	LncRNA	PREDICTED: Solanum lycopersicum uncharacterized LOC104646139 (LOC104646139), transcript variant X1
sly-miR9470-3p	101252401	XR_741897.2	LncRNA	PREDICTED: Solanum lycopersicum uncharacterized LOC101252401 (LOC101252401), transcript variant X4
sly-miR156d-5p	104649203	XR_743151.2	LncRNA	PREDICTED: Solanum lycopersicum uncharacterized LOC104649203 (LOC104649203), transcript variant X3
sly-miR156e-5p	101256544	XR_002026148.1	LncRNA	PREDICTED: Solanum lycopersicum dephospho-CoA kinase (LOC101256544), transcript variant X1
sly-miR6022	104647014	XR_741215.1	LncRNA	PREDICTED: Solanum lycopersicum uncharacterized LOC104647014 (LOC104647014), transcript variant X1
sly-miR169e-3p	109120960	XR_002028384.1	LncRNA	PREDICTED: Solanum lycopersicum uncharacterized LOC109120960 (LOC109120960)
sly-miR156d-5p	104649203	XR_743152.2	LncRNA	PREDICTED: Solanum lycopersicum uncharacterized LOC104649203 (LOC104649203), transcript variant X4
sly-miR1918	101248127	XR_002028597.1	LncRNA	PREDICTED: Solanum lycopersicum mediator of RNA polymerase II transcription subunit 19a (LOC101248127), transcript variant X4
sly-miR6024	101260313	XR_002027302.1	LncRNA	PREDICTED: Solanum lycopersicum uncharacterized LOC101260313 (LOC101260313), transcript variant X2
sly-miR5303	101263241	XR_739457.2	LncRNA	PREDICTED: Solanum lycopersicum histone-lysine N-methyltransferase ATXR7 (LOC101263241), transcript variant X4
sly-miR390b-5p	101245791	XR_002028063.1	LncRNA	PREDICTED: Solanum lycopersicum trans-acting siRNA 3-1 (TAS3-1)
sly-miR5303	101264685	XR_743661.2	LncRNA	PREDICTED: Solanum lycopersicum stomatal closure-related actin-binding protein 3 (LOC101264685), transcript variant X2
